# Supplementary material for: A causal examination of the correlation between hormonal and reproductive factors and low back pain
Source: Front Endocrinol (Lausanne). 2024 May 10;15:1326761. doi: 10.3389/fendo.2024.1326761 (PMC11116661; doi:10.3389/fendo.2024.1326761)
Supplement: Supplementary Table S1 — SNPs of ANM for LBP in MR. [file Table_1.xlsx]

## Sheet: Sheet1
Supplementary Table 1 SNPs used as valid instrumental variables for ANM on LBP.
SNP	exposure	outcome	effect_allele.exposure	other_allele.exposure	beta.exposure	eaf.exposure	chr	pos	se.outcome	pval.exposure	id.exposure	R2	F	FMean
rs10476835	age at menopause	low back pain	A	G	0.0211285	0.48716	5	141675985	0.0137	1e-08	ukb-b-17422	0.00022306	32.0869	62.3899
rs10521305	age at menopause	low back pain	C	T	0.0543913	0.059401	16	53908484	0.0255	2.70023e-12	ukb-b-17422	0.000330588	47.5599	62.3899
rs10813912	age at menopause	low back pain	G	A	0.0248784	0.623209	9	32975210	0.0146	6.00067e-11	ukb-b-17422	0.000290676	41.8163	62.3899
rs10854167	age at menopause	low back pain	C	G	-0.0394814	0.21285	20	61533039	0.0165	1.9002e-18	ukb-b-17422	0.000522332	75.1594	62.3899
rs10937153	age at menopause	low back pain	A	G	0.0360705	0.240679	3	183562925	0.0146	7.39946e-17	ukb-b-17422	0.000475552	68.425	62.3899
rs11031005	age at menopause	low back pain	C	T	0.0545996	0.143527	11	30226356	0.0181	3.90032e-25	ukb-b-17422	0.000732919	105.484	62.3899
rs112190116	age at menopause	low back pain	T	C	0.142691	0.011146	7	144096158	0.0677	5.10035e-16	ukb-b-17422	0.000448822	64.5773	62.3899
rs112217463	age at menopause	low back pain	A	G	-0.0373438	0.373637	15	41438563	0.0148	1.50003e-22	ukb-b-17422	0.000652744	93.937	62.3899
rs11571818	age at menopause	low back pain	C	T	-0.112885	0.009415	13	32968810	0.0689	3.29997e-09	ukb-b-17422	0.000237692	34.1923	62.3899
rs11650324	age at menopause	low back pain	G	A	0.0390919	0.223193	17	5330186	0.0145	1.10002e-18	ukb-b-17422	0.000529904	76.2496	62.3899
rs12046563	age at menopause	low back pain	G	A	-0.0251841	0.239078	1	43137280	0.0183	5.49997e-09	ukb-b-17422	0.000230761	33.195	62.3899
rs12132692	age at menopause	low back pain	T	C	0.0402635	0.095686	1	169732743	0.0259	1.29999e-10	ukb-b-17422	0.000280557	40.3602	62.3899
rs12503643	age at menopause	low back pain	T	G	0.0467221	0.397102	4	185746088	0.0144	2.60016e-35	ukb-b-17422	0.00104525	150.482	62.3899
rs12609254	age at menopause	low back pain	T	C	-0.0338934	0.10754	19	46865945	0.0167	1.2e-08	ukb-b-17422	0.000220505	31.7194	62.3899
rs156520	age at menopause	low back pain	A	C	0.0224571	0.285356	4	155690081	0.014	4.90004e-08	ukb-b-17422	0.00020569	29.5879	62.3899
rs1565909	age at menopause	low back pain	T	C	0.0623334	0.4874	4	84400330	0.0135	3.50026e-64	ukb-b-17422	0.00194149	279.763	62.3899
rs1655907	age at menopause	low back pain	C	T	-0.0290465	0.844827	6	29918587	0.0176	1.09999e-08	ukb-b-17422	0.000221208	31.8206	62.3899
rs16991615	age at menopause	low back pain	A	G	0.243363	0.061435	20	5948227	0.0478	1e-200	ukb-b-17422	0.00682998	989.022	62.3899
rs1760940	age at menopause	low back pain	C	A	-0.0380724	0.249675	14	20938251	0.0165	4.40048e-19	ukb-b-17422	0.000543094	78.1486	62.3899
rs17646517	age at menopause	low back pain	G	C	-0.0715967	0.023116	3	44286015	0.0376	5.1e-09	ukb-b-17422	0.000231511	33.3029	62.3899
rs17650301	age at menopause	low back pain	C	A	-0.0401265	0.295896	17	62479273	0.0142	2.80027e-23	ukb-b-17422	0.000670916	96.554	62.3899
rs17680522	age at menopause	low back pain	G	A	0.0231515	0.292256	16	9069331	0.015	1.2e-08	ukb-b-17422	0.000221732	31.8959	62.3899
rs17820747	age at menopause	low back pain	C	A	0.0259694	0.237559	2	32701687	0.0159	2.1e-09	ukb-b-17422	0.000244305	35.1437	62.3899
rs17856037	age at menopause	low back pain	T	C	-0.0739792	0.025275	14	34985658	0.0626	2.90001e-10	ukb-b-17422	0.000269664	38.7927	62.3899
rs1790123	age at menopause	low back pain	T	C	0.0346952	0.80041	12	123659542	0.0178	4.70002e-14	ukb-b-17422	0.00038461	55.3347	62.3899
rs184540366	age at menopause	low back pain	T	G	-0.0848094	0.022361	12	66649478	0.0477	4.60045e-11	ukb-b-17422	0.000314476	45.2412	62.3899
rs200448	age at menopause	low back pain	C	T	-0.0214999	0.568616	1	6701978	0.0135	8.10009e-09	ukb-b-17422	0.00022677	32.6208	62.3899
rs2241522	age at menopause	low back pain	G	A	-0.0216094	0.338832	15	42127734	0.0138	2.90001e-08	ukb-b-17422	0.000209224	30.0963	62.3899
rs2277339	age at menopause	low back pain	G	T	-0.0780582	0.106126	12	57146069	0.0201	9.70063e-39	ukb-b-17422	0.00115602	166.448	62.3899
rs251723	age at menopause	low back pain	C	G	0.0517082	0.343901	16	11953080	0.0137	1.99986e-40	ukb-b-17422	0.00120657	173.735	62.3899
rs2519673	age at menopause	low back pain	A	G	-0.0267774	0.631019	7	105994726	0.0137	2.39994e-12	ukb-b-17422	0.000333898	48.0362	62.3899
rs2524119	age at menopause	low back pain	C	T	0.0237527	0.548225	6	31229404	0.015	1.2e-10	ukb-b-17422	0.000279471	40.2039	62.3899
rs2624847	age at menopause	low back pain	T	G	0.0268408	0.743348	3	50174197	0.0158	2.1e-10	ukb-b-17422	0.000274889	39.5446	62.3899
rs2688194	age at menopause	low back pain	C	T	0.0440712	0.083337	5	154257868	0.0207	3.59998e-11	ukb-b-17422	0.000296748	42.69	62.3899
rs28416520	age at menopause	low back pain	A	G	-0.0356415	0.455502	12	130823657	0.0136	1.20005e-21	ukb-b-17422	0.000630128	90.6802	62.3899
rs2844466	age at menopause	low back pain	C	T	-0.0472066	0.358718	6	31601012	0.0138	8.30042e-35	ukb-b-17422	0.00102527	147.602	62.3899
rs28797500	age at menopause	low back pain	C	T	-0.0846069	0.777853	8	37884310	0.0158	3.80014e-81	ukb-b-17422	0.00247389	356.669	62.3899
rs2941506	age at menopause	low back pain	G	A	0.0373779	0.684301	17	37833035	0.0146	5.19996e-21	ukb-b-17422	0.000603643	86.8666	62.3899
rs299168	age at menopause	low back pain	A	G	0.0506456	0.097587	19	56317058	0.0217	8.00018e-16	ukb-b-17422	0.000451763	65.0006	62.3899
rs34811474	age at menopause	low back pain	A	G	-0.0238895	0.231433	4	25408838	0.0161	4.49997e-08	ukb-b-17422	0.000203026	29.2045	62.3899
rs349306	age at menopause	low back pain	A	G	0.0525066	0.871745	19	950694	0.0168	8.60003e-21	ukb-b-17422	0.000616484	88.7155	62.3899
rs34962991	age at menopause	low back pain	A	G	-0.0983543	0.363977	19	55827175	0.015	2.89734e-145	ukb-b-17422	0.00447882	647.028	62.3899
rs3803756	age at menopause	low back pain	T	A	-0.0247507	0.640107	17	55363674	0.014	1.2e-10	ukb-b-17422	0.000282248	40.6035	62.3899
rs4049337	age at menopause	low back pain	C	G	-0.0257386	0.698593	7	56162172	0.0157	1.5e-10	ukb-b-17422	0.000278983	40.1337	62.3899
rs419128	age at menopause	low back pain	A	G	-0.0347717	0.346747	5	6739791	0.0147	2.19989e-19	ukb-b-17422	0.000547742	78.8178	62.3899
rs4408133	age at menopause	low back pain	C	G	0.0316029	0.334777	1	242049649	0.014	6.89922e-16	ukb-b-17422	0.000444843	64.0045	62.3899
rs4491723	age at menopause	low back pain	G	A	0.0310704	0.26152	2	152280246	0.0149	1.10002e-13	ukb-b-17422	0.000372878	53.6463	62.3899
rs4495657	age at menopause	low back pain	C	T	0.0328462	0.59515	1	180949131	0.0142	2.39994e-18	ukb-b-17422	0.000519901	74.8095	62.3899
rs4668354	age at menopause	low back pain	G	C	0.0347835	0.624972	2	171814750	0.0148	5.60015e-20	ukb-b-17422	0.000567154	81.6126	62.3899
rs4679121	age at menopause	low back pain	T	C	-0.038058	0.104812	3	126160601	0.0199	3.09999e-10	ukb-b-17422	0.000271799	39.0999	62.3899
rs4716056	age at menopause	low back pain	G	A	0.0214312	0.373622	6	16278390	0.0135	1.6e-08	ukb-b-17422	0.000214977	30.924	62.3899
rs4782369	age at menopause	low back pain	C	G	0.0300142	0.325618	16	88531861	0.0145	2.09991e-14	ukb-b-17422	0.000395638	56.922	62.3899
rs4821798	age at menopause	low back pain	C	T	-0.0434503	0.307942	22	39021165	0.0142	1.20005e-27	ukb-b-17422	0.000804687	115.821	62.3899
rs4886238	age at menopause	low back pain	A	G	0.0379851	0.327255	13	61113739	0.0143	6.29941e-22	ukb-b-17422	0.000635321	91.4281	62.3899
rs507926	age at menopause	low back pain	C	T	0.0298505	0.833471	3	9008174	0.0189	1.5e-09	ukb-b-17422	0.000247351	35.5821	62.3899
rs536092	age at menopause	low back pain	T	C	0.0238492	0.382668	20	48501351	0.0135	3.89996e-10	ukb-b-17422	0.000268731	38.6585	62.3899
rs55707872	age at menopause	low back pain	C	A	0.0353746	0.314362	1	46680167	0.0146	5.70033e-19	ukb-b-17422	0.000539434	77.6216	62.3899
rs55848327	age at menopause	low back pain	A	G	0.0251522	0.768098	15	63819427	0.0148	8.79995e-09	ukb-b-17422	0.000225374	32.4199	62.3899
rs58279426	age at menopause	low back pain	C	T	0.0675842	0.478628	5	176448139	0.0135	1.50003e-74	ukb-b-17422	0.00227964	328.6	62.3899
rs6011452	age at menopause	low back pain	A	C	-0.0490561	0.221177	20	61289445	0.017	2.80027e-28	ukb-b-17422	0.000829077	119.334	62.3899
rs60907808	age at menopause	low back pain	G	A	-0.0443796	0.143874	19	23104068	0.0211	3.19963e-17	ukb-b-17422	0.000485196	69.8132	62.3899
rs6139074	age at menopause	low back pain	C	A	-0.0306464	0.206738	20	63244	0.0169	1.80011e-11	ukb-b-17422	0.000308053	44.317	62.3899
rs61870304	age at menopause	low back pain	G	A	-0.0368462	0.114382	10	126680627	0.0209	1.7e-09	ukb-b-17422	0.000275055	39.5685	62.3899
rs62156695	age at menopause	low back pain	G	A	-0.0640509	0.103904	2	67649768	0.0233	2.70023e-26	ukb-b-17422	0.000763954	109.954	62.3899
rs62445870	age at menopause	low back pain	T	C	0.0745712	0.022584	7	50514904	0.0498	1.89998e-09	ukb-b-17422	0.000245501	35.3158	62.3899
rs6435156	age at menopause	low back pain	T	C	-0.0263107	0.255236	2	203425475	0.0147	4.49997e-10	ukb-b-17422	0.000263182	37.8599	62.3899
rs6470643	age at menopause	low back pain	C	A	-0.0282893	0.217487	8	129621777	0.0184	2.39999e-10	ukb-b-17422	0.000272395	39.1857	62.3899
rs6500437	age at menopause	low back pain	C	T	-0.0354601	0.315452	16	89789898	0.0139	4.60045e-19	ukb-b-17422	0.000543059	78.1436	62.3899
rs6584351	age at menopause	low back pain	G	A	0.0204696	0.511463	10	101970997	0.0138	2.59998e-08	ukb-b-17422	0.000209392	30.1205	62.3899
rs6667957	age at menopause	low back pain	C	T	-0.0259762	0.43005	1	244613791	0.0146	4.30031e-12	ukb-b-17422	0.000330778	47.5873	62.3899
rs6736096	age at menopause	low back pain	C	T	0.0201113	0.51589	2	216958369	0.0135	4.70002e-08	ukb-b-17422	0.000202028	29.0609	62.3899
rs6830848	age at menopause	low back pain	T	G	-0.0347717	0.469038	4	48690408	0.0135	3.59998e-21	ukb-b-17422	0.000602217	86.6613	62.3899
rs6912979	age at menopause	low back pain	C	T	-0.0255493	0.28336	6	160120799	0.0143	4.30002e-10	ukb-b-17422	0.000265111	38.1376	62.3899
rs6961014	age at menopause	low back pain	G	C	-0.029044	0.787705	7	128692710	0.0159	1.2e-10	ukb-b-17422	0.000282128	40.5863	62.3899
rs7087644	age at menopause	low back pain	G	A	-0.0839477	0.040862	10	97826334	0.0377	1.99986e-19	ukb-b-17422	0.000552393	79.4874	62.3899
rs7125555	age at menopause	low back pain	T	C	-0.0276469	0.484015	11	32549463	0.0138	6.4998e-14	ukb-b-17422	0.000381785	54.9281	62.3899
rs72708144	age at menopause	low back pain	C	T	0.0587965	0.041604	1	149815740	0.0521	1.7e-10	ukb-b-17422	0.000275685	39.6591	62.3899
rs72814771	age at menopause	low back pain	G	T	0.0493593	0.09862	5	173471004	0.0255	2.90001e-15	ukb-b-17422	0.000433153	62.3217	62.3899
rs72827480	age at menopause	low back pain	C	T	0.0270835	0.402064	2	121146501	0.0137	6.00067e-13	ukb-b-17422	0.000352687	50.7403	62.3899
rs73037453	age at menopause	low back pain	T	C	-0.0264143	0.190997	19	33464225	0.0182	1.7e-08	ukb-b-17422	0.000215618	31.0162	62.3899
rs746748	age at menopause	low back pain	T	C	0.0474397	0.068678	20	25282967	0.0358	7.50067e-11	ukb-b-17422	0.000287893	41.4159	62.3899
rs74701710	age at menopause	low back pain	A	G	-0.0483435	0.056067	10	13208912	0.0345	1.79999e-09	ukb-b-17422	0.000247374	35.5854	62.3899
rs74742883	age at menopause	low back pain	G	T	-0.0310808	0.218286	7	99785765	0.0162	2.99985e-12	ukb-b-17422	0.000329677	47.4287	62.3899
rs75770066	age at menopause	low back pain	G	A	0.231048	0.030813	12	66704225	0.04	8.09096e-105	ukb-b-17422	0.00318842	460.016	62.3899
rs7589040	age at menopause	low back pain	T	C	-0.0315167	0.209818	2	135682208	0.015	2.39994e-12	ukb-b-17422	0.000329368	47.3843	62.3899
rs7661090	age at menopause	low back pain	T	C	-0.0352894	0.106995	4	13571901	0.0265	3.2e-09	ukb-b-17422	0.000237978	34.2334	62.3899
rs76928871	age at menopause	low back pain	G	A	0.043013	0.192314	2	48005821	0.0204	4.30031e-20	ukb-b-17422	0.000574755	82.7071	62.3899
rs77100210	age at menopause	low back pain	C	A	0.113128	0.051115	12	10875928	0.0339	5.60015e-41	ukb-b-17422	0.00124146	178.765	62.3899
rs7778113	age at menopause	low back pain	T	G	0.0279687	0.345864	7	5448087	0.0136	9.3994e-13	ukb-b-17422	0.000353955	50.9228	62.3899
rs7779	age at menopause	low back pain	C	G	0.0398625	0.072772	1	246930564	0.0278	1.7e-08	ukb-b-17422	0.000214442	30.847	62.3899
rs77952879	age at menopause	low back pain	C	G	-0.0421247	0.078277	8	103636045	0.0227	1.29999e-09	ukb-b-17422	0.000256058	36.8349	62.3899
rs78080415	age at menopause	low back pain	C	T	0.0298435	0.144619	6	111537016	0.0224	1.29999e-08	ukb-b-17422	0.000220351	31.6972	62.3899
rs7827991	age at menopause	low back pain	A	C	0.041731	0.078386	8	81754701	0.0317	1.29999e-09	ukb-b-17422	0.000251614	36.1955	62.3899
rs78385274	age at menopause	low back pain	C	G	-0.0593868	0.105585	2	67531571	0.0233	4.60045e-23	ukb-b-17422	0.000666118	95.8629	62.3899
rs7845046	age at menopause	low back pain	A	T	-0.0492105	0.948961	8	48926264	0.0301	4.39997e-09	ukb-b-17422	0.000234583	33.7449	62.3899
rs809673	age at menopause	low back pain	G	A	-0.0417213	0.397602	2	27656036	0.0137	1.69981e-28	ukb-b-17422	0.00083383	120.019	62.3899
rs888368	age at menopause	low back pain	G	A	0.0221884	0.505234	15	86302283	0.0135	1.7e-09	ukb-b-17422	0.000246136	35.4072	62.3899
rs9307242	age at menopause	low back pain	C	T	-0.0271568	0.354717	4	100934530	0.0136	1.20005e-12	ukb-b-17422	0.000337613	48.5709	62.3899
rs9313736	age at menopause	low back pain	A	G	-0.0314315	0.385808	5	175948316	0.0139	8.00018e-17	ukb-b-17422	0.000468205	67.3673	62.3899
rs9358956	age at menopause	low back pain	C	G	-0.0658709	0.828667	6	10887253	0.0176	1.59993e-40	ukb-b-17422	0.00123208	177.412	62.3899
rs9438982	age at menopause	low back pain	A	C	-0.0471437	0.681683	1	39358143	0.0142	7.39946e-33	ukb-b-17422	0.000964539	138.851	62.3899
rs9607474	age at menopause	low back pain	T	C	-0.032426	0.117784	22	22336708	0.0209	1.5e-08	ukb-b-17422	0.000218513	31.4328	62.3899
rs9613667	age at menopause	low back pain	C	A	-0.0232454	0.348026	22	29127412	0.0148	2e-09	ukb-b-17422	0.000245214	35.2747	62.3899
rs9788714	age at menopause	low back pain	A	G	-0.0429278	0.381174	15	89781855	0.0138	1.80011e-29	ukb-b-17422	0.000869359	125.137	62.3899
rs9818740	age at menopause	low back pain	A	G	-0.0278441	0.274865	3	135939586	0.0158	1.69981e-11	ukb-b-17422	0.000309054	44.461	62.3899
rs9915489	age at menopause	low back pain	T	A	0.043559	0.3405	17	41173226	0.0139	7.19946e-29	ukb-b-17422	0.000852153	122.659	62.3899
