# Supplementary material for: A causal examination of the correlation between hormonal and reproductive factors and low back pain
Source: Front Endocrinol (Lausanne). 2024 May 10;15:1326761. doi: 10.3389/fendo.2024.1326761 (PMC11116661; doi:10.3389/fendo.2024.1326761)
Supplement: Supplementary Table S3 — SNPs of LMC for LBP in MR. [file Table_3.xlsx]

## Sheet: Sheet1
Supplementary Table 3 SNPs used as valid instrumental variables for LMC on LBP
SNP	exposure	outcome	effect_allele.exposure	other_allele.exposure	beta.exposure	eaf.exposure	chr	pos	se.outcome	pval.exposure	id.exposure	R2	F	FMean
rs10186145	length of menstrual cycle	low back pain	G	A	0.0445272	0.508797	2	227781150	0.0136	1.03727e-09	ukb-a-351	0.000991029	30.0014	62.3899
rs11031006	length of menstrual cycle	low back pain	A	G	0.13515	0.143581	11	30226528	0.0181	1.14762e-39	ukb-a-351	0.00449206	136.466	62.3899
rs11856909	length of menstrual cycle	low back pain	G	A	0.040376	0.595153	15	67378033	0.0138	4.80485e-08	ukb-a-351	0.00078559	23.7773	62.3899
rs13261573	length of menstrual cycle	low back pain	A	G	0.0560627	0.249164	8	25248615	0.0151	1.72385e-11	ukb-a-351	0.001176	35.6077	62.3899
rs4929958	length of menstrual cycle	low back pain	C	T	-0.0453302	0.723951	11	2146053	0.0155	2.47988e-08	ukb-a-351	0.000821298	24.8589	62.3899
rs6670899	length of menstrual cycle	low back pain	A	C	0.0480518	0.397193	1	199891438	0.0135	1.0539e-10	ukb-a-351	0.00110568	33.4761	62.3899
