# Supplementary material for: A causal examination of the correlation between hormonal and reproductive factors and low back pain
Source: Front Endocrinol (Lausanne). 2024 May 10;15:1326761. doi: 10.3389/fendo.2024.1326761 (PMC11116661; doi:10.3389/fendo.2024.1326761)
Supplement: Supplementary Table S4 — SNPs of AFB for LBP in MR. [file Table_4.xlsx]

## Sheet: Sheet1
Supplementary Table 4 SNPs used as valid instrumental variables for AFB on LBP
SNP	exposure	outcome	effect_allele.exposure	other_allele.exposure	beta.exposure	eaf.exposure	chr	pos	se.outcome	pval.exposure	id.exposure	R2	F	FMean
rs10266297	age at first birth	low back pain	T	C	-0.0189957	0.594105	7	114143407	0.0136	2.59998e-08	ukb-b-12405	0.000174027	29.6761	62.3899
rs10496880	age at first birth	low back pain	C	T	-0.0367118	0.067389	2	142237435	0.0289	3.59998e-08	ukb-b-12405	0.000169407	28.8881	62.3899
rs10733289	age at first birth	low back pain	A	G	0.019313	0.585875	9	14775859	0.014	1.5e-08	ukb-b-12405	0.000180995	30.8645	62.3899
rs11938781	age at first birth	low back pain	C	T	-0.0265831	0.165449	4	17924734	0.022	4.09996e-09	ukb-b-12405	0.000195145	33.278	62.3899
rs12089815	age at first birth	low back pain	A	G	0.0197559	0.548572	1	91189933	0.014	4.49997e-09	ukb-b-12405	0.000193306	32.9643	62.3899
rs12250380	age at first birth	low back pain	G	A	0.021759	0.582487	10	106587950	0.0146	1.5e-10	ukb-b-12405	0.000230284	39.2716	62.3899
rs12435203	age at first birth	low back pain	A	G	-0.0214009	0.296743	14	103225591	0.0148	6.4e-09	ukb-b-12405	0.000191156	32.5976	62.3899
rs12555870	age at first birth	low back pain	G	A	0.0190603	0.433071	9	23347724	0.0136	1.7e-08	ukb-b-12405	0.000178393	30.4207	62.3899
rs1401989	age at first birth	low back pain	T	C	-0.0196202	0.337093	12	103501562	0.0135	2.69998e-08	ukb-b-12405	0.000172044	29.3378	62.3899
rs17314832	age at first birth	low back pain	T	C	0.020121	0.359071	4	140946939	0.0141	7.79992e-09	ukb-b-12405	0.000186346	31.7771	62.3899
rs1941954	age at first birth	low back pain	C	A	0.0214822	0.674338	18	35159596	0.0154	1.79999e-09	ukb-b-12405	0.00020269	34.5648	62.3899
rs2135029	age at first birth	low back pain	A	G	0.0190354	0.613536	5	155856538	0.0138	3.09999e-08	ukb-b-12405	0.000171832	29.3016	62.3899
rs2456973	age at first birth	low back pain	C	A	0.0212665	0.340416	12	56416928	0.0145	1.5e-09	ukb-b-12405	0.000203096	34.6341	62.3899
rs2570497	age at first birth	low back pain	T	C	-0.0227656	0.64167	2	104441546	0.0142	8.00018e-11	ukb-b-12405	0.000238332	40.6444	62.3899
rs2645977	age at first birth	low back pain	A	G	0.0204994	0.356233	12	84009188	0.0136	4e-09	ukb-b-12405	0.000192741	32.868	62.3899
rs2708146	age at first birth	low back pain	G	A	-0.0203535	0.451309	2	58955953	0.0139	1.6e-09	ukb-b-12405	0.000205168	34.9875	62.3899
rs35489785	age at first birth	low back pain	G	C	0.0210722	0.739992	16	62187036	0.0158	3.09999e-08	ukb-b-12405	0.000170869	29.1375	62.3899
rs362307	age at first birth	low back pain	T	C	-0.0381364	0.074445	4	3241845	0.0269	2.80001e-09	ukb-b-12405	0.000200423	34.1781	62.3899
rs3791129	age at first birth	low back pain	A	G	0.0218304	0.734586	1	44480093	0.0156	1.09999e-08	ukb-b-12405	0.000185832	31.6895	62.3899
rs4305732	age at first birth	low back pain	G	A	0.0235975	0.631155	6	152240448	0.014	1.20005e-11	ukb-b-12405	0.000259264	44.2149	62.3899
rs55773130	age at first birth	low back pain	C	T	0.0272199	0.182317	7	2070554	0.0151	3.29997e-10	ukb-b-12405	0.00022091	37.6726	62.3899
rs6446187	age at first birth	low back pain	A	C	-0.0342304	0.512398	3	49907111	0.0138	1.29987e-24	ukb-b-12405	0.0005855	99.8839	62.3899
rs6574760	age at first birth	low back pain	C	A	-0.0188257	0.409601	14	84376231	0.0135	3.29997e-08	ukb-b-12405	0.000171411	29.2299	62.3899
rs704061	age at first birth	low back pain	C	T	-0.0189629	0.455548	12	89771903	0.0139	1.6e-08	ukb-b-12405	0.000178375	30.4176	62.3899
rs8110682	age at first birth	low back pain	C	T	0.023022	0.388185	19	13285293	0.0153	8.30042e-11	ukb-b-12405	0.000251753	42.9337	62.3899
rs896686	age at first birth	low back pain	G	T	0.0262649	0.171302	18	53123031	0.0165	5.30005e-09	ukb-b-12405	0.000195858	33.3995	62.3899
rs909001	age at first birth	low back pain	G	C	-0.0269563	0.171359	1	32196647	0.0163	1.29999e-09	ukb-b-12405	0.000206359	35.1907	62.3899
rs9372625	age at first birth	low back pain	A	G	0.0239841	0.380982	6	98344031	0.0145	3.59998e-12	ukb-b-12405	0.000271322	46.2718	62.3899
rs951807	age at first birth	low back pain	C	T	-0.0251286	0.593902	2	60513389	0.0143	1.69981e-13	ukb-b-12405	0.000304588	51.9468	62.3899
rs9882678	age at first birth	low back pain	T	G	-0.0259519	0.822358	3	74878121	0.0195	3.69999e-09	ukb-b-12405	0.000196777	33.5563	62.3899
rs9901404	age at first birth	low back pain	G	A	0.0199698	0.525182	17	21213782	0.0135	4.09996e-08	ukb-b-12405	0.000198891	33.9168	62.3899
rs9980269	age at first birth	low back pain	A	G	0.022712	0.216419	21	33231144	0.0159	3.50002e-08	ukb-b-12405	0.000174952	29.8339	62.3899
