# Supplementary material for: A causal examination of the correlation between hormonal and reproductive factors and low back pain
Source: Front Endocrinol (Lausanne). 2024 May 10;15:1326761. doi: 10.3389/fendo.2024.1326761 (PMC11116661; doi:10.3389/fendo.2024.1326761)
Supplement: Supplementary Table S5 — SNPs of ALB for LBP in MR. [file Table_5.xlsx]

## Sheet: Sheet1
Supplementary Table 5 SNPs used as valid instrumental variables for ALB on LBP
SNP	exposure	outcome	effect_allele.exposure	other_allele.exposure	beta.exposure	eaf.exposure	chr	pos	se.outcome	pval.exposure	id.exposure	R2	F	FMean
rs10964737	Age at last live birth	low back pain	C	T	0.0863379	0.01222	9	2093264	0.106	2.90001e-08	ukb-b-8727	0.000179955	30.6422	62.3899
rs12250380	Age at last live birth	low back pain	G	A	0.0201909	0.5825	10	106587950	0.0146	4.20001e-09	ukb-b-8727	0.000198287	33.7642	62.3899
rs1267490	Age at last live birth	low back pain	A	G	-0.024378	0.814111	6	14717463	0.0258	2.1e-08	ukb-b-8727	0.000179872	30.628	62.3899
rs2208082	Age at last live birth	low back pain	A	G	0.0190597	0.568997	20	14761085	0.0138	2.90001e-08	ukb-b-8727	0.000178177	30.3394	62.3899
rs359253	Age at last live birth	low back pain	A	G	-0.0222912	0.639341	2	60481956	0.0143	2.39999e-10	ukb-b-8727	0.000229153	39.0214	62.3899
rs6446187	Age at last live birth	low back pain	A	C	-0.0291866	0.512378	3	49907111	0.0138	6.20012e-18	ukb-b-8727	0.000425668	72.4991	62.3899
