# Supplementary material for: A causal examination of the correlation between hormonal and reproductive factors and low back pain
Source: Front Endocrinol (Lausanne). 2024 May 10;15:1326761. doi: 10.3389/fendo.2024.1326761 (PMC11116661; doi:10.3389/fendo.2024.1326761)
Supplement: Supplementary Table S6 — SNPs of AFS for LBP in MR. [file Table_6.xlsx]

## Sheet: Sheet1
Supplementary Table 6 SNPs used as valid instrumental variables for AFS on LBP
SNP	exposure	outcome	effect_allele.exposure	other_allele.exposure	beta.exposure	eaf.exposure	chr	pos	se.outcome	pval.exposure	id.exposure	R2	F	FMean
rs1000586	Age first had sexual intercourse	low back pain	C	T	-0.0129893	0.356215	5	76938952	0.0138	1.2e-08	ukb-b-6591	7.73846e-05	31.4558	62.3899
rs10085776	Age first had sexual intercourse	low back pain	C	T	-0.013742	0.565458	7	104441909	0.0135	2.99999e-10	ukb-b-6591	9.2803e-05	37.7237	62.3899
rs10104523	Age first had sexual intercourse	low back pain	C	T	-0.0125544	0.522362	8	73889570	0.0136	6.29999e-09	ukb-b-6591	7.86488e-05	31.9697	62.3899
rs10137475	Age first had sexual intercourse	low back pain	A	G	0.0132976	0.577345	14	58797953	0.0135	1.09999e-09	ukb-b-6591	8.62974e-05	35.0791	62.3899
rs10144067	Age first had sexual intercourse	low back pain	T	C	-0.0141806	0.591023	14	93885198	0.0137	1.5e-10	ukb-b-6591	9.72126e-05	39.5164	62.3899
rs10204104	Age first had sexual intercourse	low back pain	A	C	-0.0163744	0.831892	2	174209822	0.0189	1.5e-08	ukb-b-6591	7.49922e-05	30.4832	62.3899
rs10492794	Age first had sexual intercourse	low back pain	T	C	0.0161576	0.178188	16	12639850	0.0196	1.2e-08	ukb-b-6591	7.64601e-05	31.0799	62.3899
rs10750367	Age first had sexual intercourse	low back pain	G	A	-0.0152168	0.554253	11	127449675	0.0143	3.59998e-12	ukb-b-6591	0.000114412	46.5088	62.3899
rs10880088	Age first had sexual intercourse	low back pain	T	C	0.0161646	0.216086	12	41905897	0.0167	8e-10	ukb-b-6591	8.85228e-05	35.9837	62.3899
rs10994777	Age first had sexual intercourse	low back pain	A	G	0.0188266	0.161939	10	63233988	0.0213	1.40001e-10	ukb-b-6591	9.62057e-05	39.1071	62.3899
rs11030102	Age first had sexual intercourse	low back pain	G	C	-0.0141577	0.261081	11	27681596	0.0156	8.19993e-09	ukb-b-6591	7.7337e-05	31.4365	62.3899
rs11030402	Age first had sexual intercourse	low back pain	G	A	0.0131312	0.368192	11	28676170	0.014	4.49997e-09	ukb-b-6591	8.02229e-05	32.6096	62.3899
rs11111153	Age first had sexual intercourse	low back pain	C	A	-0.0139553	0.245107	12	102476087	0.0141	2.59998e-08	ukb-b-6591	7.20692e-05	29.295	62.3899
rs11123817	Age first had sexual intercourse	low back pain	T	C	0.0150766	0.401206	2	100835032	0.0137	6.59933e-12	ukb-b-6591	0.000109215	44.3958	62.3899
rs11188601	Age first had sexual intercourse	low back pain	C	T	-0.0172077	0.364739	10	97856899	0.0144	1.59993e-14	ukb-b-6591	0.000137218	55.7805	62.3899
rs112633616	Age first had sexual intercourse	low back pain	C	A	0.0403127	0.033261	12	23238326	0.0668	3.10027e-11	ukb-b-6591	0.00010451	42.4831	62.3899
rs113338260	Age first had sexual intercourse	low back pain	C	T	-0.0156495	0.215732	5	46004640	0.0166	2.5e-09	ukb-b-6591	8.28724e-05	33.6867	62.3899
rs113367286	Age first had sexual intercourse	low back pain	T	C	0.0198309	0.278201	7	140144414	0.0147	1.99986e-16	ukb-b-6591	0.000157939	64.2053	62.3899
rs1139897	Age first had sexual intercourse	low back pain	A	G	0.0175687	0.223525	16	720986	0.0141	1.20005e-11	ukb-b-6591	0.000107143	43.5534	62.3899
rs1156981	Age first had sexual intercourse	low back pain	G	A	-0.0227567	0.901596	1	88829969	0.0244	2.90001e-10	ukb-b-6591	9.18911e-05	37.353	62.3899
rs11678980	Age first had sexual intercourse	low back pain	A	G	-0.0123757	0.461083	2	162101261	0.014	2.90001e-08	ukb-b-6591	7.6115e-05	30.9397	62.3899
rs11729080	Age first had sexual intercourse	low back pain	A	G	0.0229745	0.171149	4	112503872	0.0197	9.20026e-16	ukb-b-6591	0.000149752	60.8766	62.3899
rs11770163	Age first had sexual intercourse	low back pain	C	G	-0.0130247	0.331573	7	116417848	0.0141	1.40001e-08	ukb-b-6591	7.51967e-05	30.5664	62.3899
rs12147463	Age first had sexual intercourse	low back pain	A	G	-0.020875	0.193433	14	41059928	0.0188	3.90032e-14	ukb-b-6591	0.000135973	55.2746	62.3899
rs12204714	Age first had sexual intercourse	low back pain	T	C	0.0292636	0.632102	6	152235339	0.014	4.30031e-39	ukb-b-6591	0.000398291	161.952	62.3899
rs12448731	Age first had sexual intercourse	low back pain	T	C	-0.0174598	0.141723	16	49622284	0.0183	1.89998e-08	ukb-b-6591	7.41611e-05	30.1454	62.3899
rs12468863	Age first had sexual intercourse	low back pain	T	C	0.0135539	0.517874	2	26940294	0.0136	4.09996e-10	ukb-b-6591	9.17367e-05	37.2903	62.3899
rs12505942	Age first had sexual intercourse	low back pain	C	T	0.0160611	0.342778	4	140906390	0.0142	1.69981e-12	ukb-b-6591	0.000116227	47.2464	62.3899
rs12511982	Age first had sexual intercourse	low back pain	A	G	0.0126559	0.550535	4	60736871	0.0136	5.89997e-09	ukb-b-6591	7.92678e-05	32.2214	62.3899
rs12523097	Age first had sexual intercourse	low back pain	C	T	-0.0160994	0.297727	5	167411400	0.0168	1.10002e-11	ukb-b-6591	0.000108386	44.0588	62.3899
rs12523398	Age first had sexual intercourse	low back pain	A	T	0.0225484	0.173891	5	45119647	0.02	2.99985e-15	ukb-b-6591	0.000146075	59.3816	62.3899
rs12671608	Age first had sexual intercourse	low back pain	C	T	-0.017507	0.139057	7	153524115	0.0191	2.19999e-08	ukb-b-6591	7.33873e-05	29.8308	62.3899
rs12701263	Age first had sexual intercourse	low back pain	T	C	0.0144102	0.400041	7	32962089	0.0139	6.09958e-11	ukb-b-6591	9.96773e-05	40.5184	62.3899
rs12795483	Age first had sexual intercourse	low back pain	G	A	0.0129681	0.518144	11	79883503	0.0135	2.19999e-09	ukb-b-6591	8.39751e-05	34.135	62.3899
rs12826060	Age first had sexual intercourse	low back pain	G	T	-0.0130686	0.412502	12	24195419	0.0143	2.5e-09	ukb-b-6591	8.27791e-05	33.6488	62.3899
rs12907546	Age first had sexual intercourse	low back pain	A	G	-0.0228102	0.211749	15	47684280	0.0162	7.39946e-18	ukb-b-6591	0.00017369	70.6093	62.3899
rs1295220	Age first had sexual intercourse	low back pain	T	C	-0.0186416	0.25348	5	154890837	0.0149	6.70039e-14	ukb-b-6591	0.000131517	53.4627	62.3899
rs12970816	Age first had sexual intercourse	low back pain	A	G	-0.0152412	0.395202	18	50023859	0.014	5.50047e-12	ukb-b-6591	0.000111045	45.1397	62.3899
rs13009008	Age first had sexual intercourse	low back pain	G	A	0.0182638	0.672296	2	174043233	0.0139	1.59993e-15	ukb-b-6591	0.000146979	59.749	62.3899
rs13289229	Age first had sexual intercourse	low back pain	T	G	0.0178001	0.178174	9	86224419	0.0194	4.49997e-10	ukb-b-6591	9.27896e-05	37.7183	62.3899
rs1368546	Age first had sexual intercourse	low back pain	C	T	0.015985	0.55706	2	104057364	0.0136	1.59993e-13	ukb-b-6591	0.000126096	51.2589	62.3899
rs1391075	Age first had sexual intercourse	low back pain	C	A	-0.0153773	0.643432	12	84052203	0.0136	8.49963e-12	ukb-b-6591	0.000108501	44.1057	62.3899
rs1392816	Age first had sexual intercourse	low back pain	T	C	0.0175184	0.387907	1	66481188	0.0142	3.80014e-15	ukb-b-6591	0.000145735	59.2434	62.3899
rs140098	Age first had sexual intercourse	low back pain	C	T	-0.0123554	0.547765	22	30126644	0.0135	1.5e-08	ukb-b-6591	7.56314e-05	30.7431	62.3899
rs141547796	Age first had sexual intercourse	low back pain	A	G	0.0334614	0.082193	6	50615935	0.0184	2.80027e-17	ukb-b-6591	0.000168929	68.6737	62.3899
rs1585634	Age first had sexual intercourse	low back pain	C	G	-0.0155686	0.802142	8	54396376	0.017	1e-08	ukb-b-6591	7.69368e-05	31.2737	62.3899
rs159428	Age first had sexual intercourse	low back pain	C	T	-0.0133188	0.526473	20	31099311	0.0141	7.19996e-10	ukb-b-6591	8.84466e-05	35.9527	62.3899
rs16948048	Age first had sexual intercourse	low back pain	G	A	-0.0166924	0.36754	17	47440466	0.0136	8.99912e-14	ukb-b-6591	0.00012954	52.6592	62.3899
rs17164088	Age first had sexual intercourse	low back pain	G	A	-0.012374	0.422075	4	2675893	0.0139	1.40001e-08	ukb-b-6591	7.46984e-05	30.3638	62.3899
rs1812249	Age first had sexual intercourse	low back pain	A	G	-0.0148834	0.215227	1	112284581	0.0151	1.40001e-08	ukb-b-6591	7.48299e-05	30.4173	62.3899
rs182353	Age first had sexual intercourse	low back pain	T	C	-0.013024	0.468089	8	115396892	0.0137	1.7e-09	ukb-b-6591	8.44668e-05	34.3349	62.3899
rs1931263	Age first had sexual intercourse	low back pain	T	G	-0.0121295	0.4895	1	96175101	0.0136	1.79999e-08	ukb-b-6591	7.35299e-05	29.8888	62.3899
rs2025151	Age first had sexual intercourse	low back pain	G	C	0.0150046	0.196133	9	99161512	0.0178	3.29997e-08	ukb-b-6591	7.09927e-05	28.8574	62.3899
rs206005	Age first had sexual intercourse	low back pain	T	A	-0.0144473	0.760199	6	164427025	0.0175	1.2e-08	ukb-b-6591	7.60995e-05	30.9334	62.3899
rs2084572	Age first had sexual intercourse	low back pain	G	A	0.014725	0.450207	3	17315758	0.0138	1e-11	ukb-b-6591	0.000107338	43.6326	62.3899
rs2093623	Age first had sexual intercourse	low back pain	A	G	0.0150008	0.496285	10	10922977	0.0135	5.50047e-12	ukb-b-6591	0.000112506	45.7337	62.3899
rs2130893	Age first had sexual intercourse	low back pain	C	G	0.0149124	0.285354	10	134039132	0.0143	1.5e-09	ukb-b-6591	9.06985e-05	36.8682	62.3899
rs2174752	Age first had sexual intercourse	low back pain	T	G	-0.0143345	0.45124	13	69332015	0.0136	3.90032e-11	ukb-b-6591	0.000101762	41.3658	62.3899
rs2176337	Age first had sexual intercourse	low back pain	T	A	-0.017784	0.315293	9	108959330	0.0143	1.9002e-14	ukb-b-6591	0.000136555	55.5111	62.3899
rs2188151	Age first had sexual intercourse	low back pain	T	G	-0.0222145	0.424889	3	50201924	0.0144	2.49977e-24	ukb-b-6591	0.000241174	98.05	62.3899
rs2274568	Age first had sexual intercourse	low back pain	A	G	-0.0137862	0.580677	1	110612925	0.0139	2.99999e-10	ukb-b-6591	9.25555e-05	37.6231	62.3899
rs2382440	Age first had sexual intercourse	low back pain	C	G	-0.0173228	0.155948	9	14140575	0.0193	6.29999e-09	ukb-b-6591	7.89978e-05	32.1116	62.3899
rs239190	Age first had sexual intercourse	low back pain	T	C	0.0151426	0.532174	6	101129067	0.0135	2.60016e-12	ukb-b-6591	0.000114174	46.4121	62.3899
rs2406374	Age first had sexual intercourse	low back pain	T	C	0.0147643	0.314035	5	106936435	0.0155	1.89998e-10	ukb-b-6591	9.39152e-05	38.1759	62.3899
rs2535593	Age first had sexual intercourse	low back pain	C	T	0.0125197	0.460207	17	5621920	0.0136	8.30004e-09	ukb-b-6591	7.7875e-05	31.6552	62.3899
rs2612030	Age first had sexual intercourse	low back pain	C	T	0.0242699	0.838125	3	53773437	0.0222	1.29987e-16	ukb-b-6591	0.000159829	64.9735	62.3899
rs2613765	Age first had sexual intercourse	low back pain	A	G	0.01255	0.473384	19	5066330	0.0135	6.49995e-09	ukb-b-6591	7.85281e-05	31.9206	62.3899
rs2625223	Age first had sexual intercourse	low back pain	T	C	0.0124972	0.48174	1	204903874	0.0136	1e-08	ukb-b-6591	7.79859e-05	31.7002	62.3899
rs2744450	Age first had sexual intercourse	low back pain	G	A	0.017081	0.802128	6	52951766	0.018	2.80001e-10	ukb-b-6591	9.26157e-05	37.6476	62.3899
rs293736	Age first had sexual intercourse	low back pain	C	A	-0.0140549	0.722176	20	31925189	0.0147	5.69994e-09	ukb-b-6591	7.92681e-05	32.2215	62.3899
rs2974311	Age first had sexual intercourse	low back pain	A	G	0.0138488	0.497467	8	42455166	0.0135	1.40001e-10	ukb-b-6591	9.58922e-05	38.9796	62.3899
rs298247	Age first had sexual intercourse	low back pain	C	G	0.016312	0.167472	2	157233542	0.0167	1.5e-08	ukb-b-6591	7.41969e-05	30.1599	62.3899
rs3007104	Age first had sexual intercourse	low back pain	A	G	-0.0154973	0.42401	14	47367434	0.0142	1.39991e-12	ukb-b-6591	0.000117309	47.6866	62.3899
rs30266	Age first had sexual intercourse	low back pain	A	G	-0.012649	0.328425	5	103972357	0.015	3.69999e-08	ukb-b-6591	7.05786e-05	28.6891	62.3899
rs341521	Age first had sexual intercourse	low back pain	A	G	-0.0152941	0.702818	13	60399045	0.0156	1.09999e-10	ukb-b-6591	9.77109e-05	39.719	62.3899
rs34517439	Age first had sexual intercourse	low back pain	A	C	-0.0197888	0.121862	1	78450517	0.0204	2.90001e-09	ukb-b-6591	8.38108e-05	34.0682	62.3899
rs34606772	Age first had sexual intercourse	low back pain	T	C	-0.0127837	0.416265	3	24908376	0.0136	6.4e-09	ukb-b-6591	7.94198e-05	32.2831	62.3899
rs34811474	Age first had sexual intercourse	low back pain	A	G	0.015285	0.2308	4	25408838	0.0161	2.30001e-09	ukb-b-6591	8.29537e-05	33.7198	62.3899
rs35128508	Age first had sexual intercourse	low back pain	A	G	0.0146939	0.273405	18	42722340	0.0156	1.29999e-09	ukb-b-6591	8.57834e-05	34.8701	62.3899
rs35408390	Age first had sexual intercourse	low back pain	T	C	-0.0121304	0.44275	2	86471782	0.0135	2.19999e-08	ukb-b-6591	7.26087e-05	29.5143	62.3899
rs35851551	Age first had sexual intercourse	low back pain	G	A	-0.0264733	0.101404	7	31330785	0.0286	2.09991e-13	ukb-b-6591	0.000127722	51.9199	62.3899
rs359239	Age first had sexual intercourse	low back pain	T	C	-0.0189754	0.573829	2	60474600	0.0138	4.79954e-18	ukb-b-6591	0.000176108	71.5924	62.3899
rs369230	Age first had sexual intercourse	low back pain	T	G	-0.0184886	0.692409	16	89645437	0.0141	3.90032e-15	ukb-b-6591	0.000145604	59.1902	62.3899
rs3741499	Age first had sexual intercourse	low back pain	C	T	-0.0161594	0.649467	12	56474379	0.0144	8.69961e-13	ukb-b-6591	0.000118896	48.3315	62.3899
rs3758790	Age first had sexual intercourse	low back pain	G	A	0.0153546	0.359414	11	105850090	0.0136	8.9002e-12	ukb-b-6591	0.000108562	44.1305	62.3899
rs3789045	Age first had sexual intercourse	low back pain	T	C	0.0149923	0.209024	1	204586812	0.0161	1.5e-08	ukb-b-6591	7.43235e-05	30.2114	62.3899
rs3896224	Age first had sexual intercourse	low back pain	G	A	0.0213629	0.414575	10	106467853	0.0135	3.69999e-22	ukb-b-6591	0.000221526	90.0603	62.3899
rs4075359	Age first had sexual intercourse	low back pain	C	T	0.0188718	0.625175	8	9487813	0.0192	2.90001e-17	ukb-b-6591	0.000166912	67.8534	62.3899
rs4443996	Age first had sexual intercourse	low back pain	C	A	-0.0167341	0.476487	10	134191005	0.0143	1.10002e-14	ukb-b-6591	0.000139705	56.7919	62.3899
rs4602427	Age first had sexual intercourse	low back pain	G	C	-0.0162149	0.803857	3	117474457	0.0164	2.5e-09	ukb-b-6591	8.29106e-05	33.7022	62.3899
rs4702	Age first had sexual intercourse	low back pain	A	G	0.0167404	0.556374	15	91426560	0.0136	1.29987e-14	ukb-b-6591	0.000138339	56.2365	62.3899
rs4727799	Age first had sexual intercourse	low back pain	T	C	-0.0208488	0.647272	7	114110568	0.0144	2.80027e-20	ukb-b-6591	0.000198481	80.6896	62.3899
rs4735438	Age first had sexual intercourse	low back pain	T	C	-0.0144891	0.587017	8	97829917	0.0136	3.90032e-11	ukb-b-6591	0.000101788	41.3764	62.3899
rs4755749	Age first had sexual intercourse	low back pain	G	A	0.0157811	0.403067	11	43865501	0.0137	7.29962e-13	ukb-b-6591	0.000119842	48.716	62.3899
rs4800204	Age first had sexual intercourse	low back pain	T	C	-0.0127969	0.570335	18	22647270	0.0135	4.60002e-09	ukb-b-6591	8.02601e-05	32.6247	62.3899
rs4805761	Age first had sexual intercourse	low back pain	G	A	0.0165446	0.843347	19	32951800	0.0195	2.59998e-08	ukb-b-6591	7.23249e-05	29.3989	62.3899
rs4873133	Age first had sexual intercourse	low back pain	T	C	-0.0180907	0.292431	8	51127054	0.0155	2.49977e-14	ukb-b-6591	0.000135436	55.0559	62.3899
rs4937872	Age first had sexual intercourse	low back pain	G	A	-0.0160337	0.407721	11	112827715	0.0146	3.90032e-13	ukb-b-6591	0.000124161	50.4723	62.3899
rs4952343	Age first had sexual intercourse	low back pain	G	A	0.0138227	0.446361	2	32858637	0.0137	2.99999e-10	ukb-b-6591	9.44341e-05	38.3868	62.3899
rs4961705	Age first had sexual intercourse	low back pain	C	G	0.0134658	0.348007	9	16347927	0.0145	5e-09	ukb-b-6591	8.22859e-05	33.4483	62.3899
rs55659265	Age first had sexual intercourse	low back pain	A	G	-0.0244268	0.066555	2	142247852	0.0289	1.5e-08	ukb-b-6591	7.41366e-05	30.1354	62.3899
rs56306056	Age first had sexual intercourse	low back pain	A	G	0.0160763	0.214739	2	184416610	0.0172	8.60003e-10	ukb-b-6591	8.7162e-05	35.4305	62.3899
rs56392241	Age first had sexual intercourse	low back pain	C	A	-0.0135943	0.393183	3	131968209	0.014	8.60003e-10	ukb-b-6591	8.81853e-05	35.8465	62.3899
rs57537843	Age first had sexual intercourse	low back pain	A	G	-0.0160011	0.381196	2	22558973	0.0137	6.00067e-13	ukb-b-6591	0.00012079	49.1016	62.3899
rs6011138	Age first had sexual intercourse	low back pain	C	T	0.0188511	0.13593	20	62440700	0.0204	2.30001e-09	ukb-b-6591	8.34772e-05	33.9325	62.3899
rs61746970	Age first had sexual intercourse	low back pain	A	G	-0.0316935	0.039278	19	51132746	0.0346	2.39999e-08	ukb-b-6591	7.58084e-05	30.8151	62.3899
rs61864459	Age first had sexual intercourse	low back pain	T	G	0.0161278	0.169827	10	120013564	0.019	2.1e-08	ukb-b-6591	7.33425e-05	29.8126	62.3899
rs62134195	Age first had sexual intercourse	low back pain	T	C	0.033951	0.040972	2	45062249	0.0323	6.90001e-10	ukb-b-6591	9.05844e-05	36.8218	62.3899
rs62370848	Age first had sexual intercourse	low back pain	C	A	0.0170776	0.198707	5	124228322	0.0175	3.59998e-10	ukb-b-6591	9.28727e-05	37.7521	62.3899
rs62439690	Age first had sexual intercourse	low back pain	A	G	-0.0162081	0.262405	7	21417556	0.0168	6.29941e-11	ukb-b-6591	0.000101691	41.3372	62.3899
rs6486065	Age first had sexual intercourse	low back pain	G	T	0.0161936	0.708967	11	12870969	0.0168	1e-11	ukb-b-6591	0.000108214	43.989	62.3899
rs6517512	Age first had sexual intercourse	low back pain	G	A	-0.029508	0.955633	21	40512129	0.0389	1.79999e-08	ukb-b-6591	7.38347e-05	30.0127	62.3899
rs6549670	Age first had sexual intercourse	low back pain	G	A	-0.0182814	0.83866	3	74936132	0.0205	4.70002e-10	ukb-b-6591	9.04434e-05	36.7645	62.3899
rs6564268	Age first had sexual intercourse	low back pain	G	C	0.0283611	0.056059	16	75606878	0.0284	1.5e-09	ukb-b-6591	8.51268e-05	34.6032	62.3899
rs6586405	Age first had sexual intercourse	low back pain	A	C	-0.0130845	0.326953	1	234739101	0.0146	1.5e-08	ukb-b-6591	7.53486e-05	30.6281	62.3899
rs66906321	Age first had sexual intercourse	low back pain	C	T	-0.0181218	0.818851	2	630070	0.0184	2e-10	ukb-b-6591	9.74257e-05	39.603	62.3899
rs6692613	Age first had sexual intercourse	low back pain	T	C	-0.012697	0.530087	1	7524974	0.0136	4.20001e-09	ukb-b-6591	8.0315e-05	32.6471	62.3899
rs6719762	Age first had sexual intercourse	low back pain	C	T	-0.0233857	0.473304	2	60166832	0.0139	3.19963e-27	ukb-b-6591	0.000272666	110.857	62.3899
rs6748341	Age first had sexual intercourse	low back pain	G	C	0.0167655	0.316337	2	225377574	0.0148	5.40008e-13	ukb-b-6591	0.000121578	49.422	62.3899
rs6763967	Age first had sexual intercourse	low back pain	A	G	-0.0140945	0.264904	3	60884616	0.0154	7.90005e-09	ukb-b-6591	7.73681e-05	31.4491	62.3899
rs67723420	Age first had sexual intercourse	low back pain	A	T	0.0145464	0.376012	3	35775115	0.0143	7.50067e-11	ukb-b-6591	9.92931e-05	40.3622	62.3899
rs6939048	Age first had sexual intercourse	low back pain	A	G	0.0143527	0.627277	6	26327953	0.0146	1.29999e-10	ukb-b-6591	9.63258e-05	39.1559	62.3899
rs6966769	Age first had sexual intercourse	low back pain	G	A	0.0185136	0.11444	7	1299334	0.0188	4.90004e-08	ukb-b-6591	6.94716e-05	28.2391	62.3899
rs6966898	Age first had sexual intercourse	low back pain	T	C	-0.0138863	0.333033	7	135221170	0.0146	1.6e-09	ukb-b-6591	8.56633e-05	34.8213	62.3899
rs6973256	Age first had sexual intercourse	low back pain	T	C	0.0141037	0.59757	7	133055603	0.0136	2.1e-10	ukb-b-6591	9.56699e-05	38.8892	62.3899
rs6978112	Age first had sexual intercourse	low back pain	T	C	-0.0170735	0.411515	7	1966841	0.0138	7.39946e-15	ukb-b-6591	0.000141187	57.3945	62.3899
rs702	Age first had sexual intercourse	low back pain	T	A	0.0205228	0.838619	4	28710551	0.0246	2.60016e-12	ukb-b-6591	0.000114004	46.3428	62.3899
rs7025089	Age first had sexual intercourse	low back pain	A	C	0.0160854	0.680645	9	134881443	0.0146	3.59998e-12	ukb-b-6591	0.000112483	45.7245	62.3899
rs705240	Age first had sexual intercourse	low back pain	T	C	-0.0160808	0.184196	3	118457615	0.0153	7.00003e-09	ukb-b-6591	7.77162e-05	31.5906	62.3899
rs7085104	Age first had sexual intercourse	low back pain	G	A	-0.0146038	0.328663	10	104628873	0.0144	2e-10	ukb-b-6591	9.41138e-05	38.2566	62.3899
rs710289	Age first had sexual intercourse	low back pain	G	A	-0.0159545	0.415982	14	98535256	0.0137	3.19963e-13	ukb-b-6591	0.000123679	50.2763	62.3899
rs71433405	Age first had sexual intercourse	low back pain	T	C	0.0261044	0.066007	13	97130945	0.0349	2.99999e-09	ukb-b-6591	8.40216e-05	34.1539	62.3899
rs714393	Age first had sexual intercourse	low back pain	T	C	0.0141564	0.456816	2	212698718	0.0136	6.09958e-11	ukb-b-6591	9.94544e-05	40.4278	62.3899
rs7156339	Age first had sexual intercourse	low back pain	T	C	-0.0236699	0.163624	14	103366698	0.0163	4.90004e-16	ukb-b-6591	0.000153346	62.3377	62.3899
rs7167444	Age first had sexual intercourse	low back pain	T	G	-0.0141521	0.253197	15	97495941	0.0143	1.7e-08	ukb-b-6591	7.57419e-05	30.788	62.3899
rs7188873	Age first had sexual intercourse	low back pain	G	A	-0.0172874	0.622795	16	24727064	0.014	8.60003e-15	ukb-b-6591	0.000140414	57.0802	62.3899
rs7236339	Age first had sexual intercourse	low back pain	A	G	-0.0204944	0.22753	18	77579773	0.0157	2.49977e-15	ukb-b-6591	0.000147646	60.0202	62.3899
rs72674824	Age first had sexual intercourse	low back pain	C	T	0.0147127	0.24179	8	95489281	0.0141	5.60003e-09	ukb-b-6591	7.93675e-05	32.2619	62.3899
rs72822625	Age first had sexual intercourse	low back pain	A	G	0.0215117	0.094583	5	167757575	0.0174	5.49997e-09	ukb-b-6591	7.92576e-05	32.2172	62.3899
rs72887338	Age first had sexual intercourse	low back pain	C	T	-0.0164161	0.386847	6	67536056	0.0142	1.29987e-13	ukb-b-6591	0.000127843	51.9692	62.3899
rs72996415	Age first had sexual intercourse	low back pain	C	T	0.0254579	0.064661	6	105265993	0.03	1.5e-08	ukb-b-6591	7.83947e-05	31.8664	62.3899
rs7381195	Age first had sexual intercourse	low back pain	A	T	-0.014635	0.611957	5	60030791	0.0141	3.80014e-11	ukb-b-6591	0.000101722	41.3497	62.3899
rs74583305	Age first had sexual intercourse	low back pain	T	C	0.0437545	0.020359	8	143419130	0.0614	1.09999e-08	ukb-b-6591	7.63658e-05	31.0416	62.3899
rs7476	Age first had sexual intercourse	low back pain	C	A	-0.0139275	0.312212	11	46342834	0.0172	2.59998e-09	ukb-b-6591	8.33068e-05	33.8633	62.3899
rs75082770	Age first had sexual intercourse	low back pain	G	A	-0.0352385	0.037667	2	185915324	0.0407	6.29999e-10	ukb-b-6591	9.00225e-05	36.5934	62.3899
rs75783371	Age first had sexual intercourse	low back pain	C	T	0.018662	0.139303	13	28109961	0.0173	3.2e-09	ukb-b-6591	8.35136e-05	33.9473	62.3899
rs76513770	Age first had sexual intercourse	low back pain	C	T	0.0256106	0.127724	16	72505534	0.0182	2.39994e-15	ukb-b-6591	0.000146149	59.4117	62.3899
rs767943	Age first had sexual intercourse	low back pain	A	C	-0.0186374	0.264898	6	23446691	0.0158	3.59998e-14	ukb-b-6591	0.000135278	54.9918	62.3899
rs77214504	Age first had sexual intercourse	low back pain	T	A	0.0348552	0.047379	1	75316394	0.0509	7.10068e-12	ukb-b-6591	0.000109666	44.5791	62.3899
rs7729019	Age first had sexual intercourse	low back pain	T	C	0.0126365	0.613575	5	155844242	0.0138	1.09999e-08	ukb-b-6591	7.5721e-05	30.7795	62.3899
rs7785195	Age first had sexual intercourse	low back pain	A	G	0.0158783	0.659377	7	3424686	0.0147	2.99985e-12	ukb-b-6591	0.000113252	46.037	62.3899
rs7804551	Age first had sexual intercourse	low back pain	G	A	0.0208069	0.15369	7	99119110	0.0163	3.29989e-12	ukb-b-6591	0.000112621	45.7806	62.3899
rs7815125	Age first had sexual intercourse	low back pain	A	T	0.0187851	0.826612	8	87680112	0.0197	4.30031e-11	ukb-b-6591	0.000101153	41.1182	62.3899
rs783544	Age first had sexual intercourse	low back pain	C	A	0.0164657	0.750616	15	83240293	0.016	4.00037e-11	ukb-b-6591	0.000101503	41.2604	62.3899
rs784255	Age first had sexual intercourse	low back pain	T	G	-0.0142825	0.475487	18	53403228	0.0135	4.40048e-11	ukb-b-6591	0.00010175	41.3609	62.3899
rs7857266	Age first had sexual intercourse	low back pain	T	C	0.0131398	0.395169	9	96381765	0.0138	3.69999e-09	ukb-b-6591	8.25324e-05	33.5485	62.3899
rs7868984	Age first had sexual intercourse	low back pain	C	T	0.0138367	0.415886	9	23357826	0.0137	2.69998e-10	ukb-b-6591	9.3018e-05	37.8111	62.3899
rs7909331	Age first had sexual intercourse	low back pain	G	A	-0.0167017	0.164505	10	11205224	0.0192	9.20005e-09	ukb-b-6591	7.66786e-05	31.1688	62.3899
rs7911962	Age first had sexual intercourse	low back pain	T	C	0.0135852	0.384406	10	9968483	0.0152	1.09999e-09	ukb-b-6591	8.73467e-05	35.5056	62.3899
rs79231171	Age first had sexual intercourse	low back pain	A	C	0.0224426	0.077097	2	213841704	0.0354	2.69998e-08	ukb-b-6591	7.16754e-05	29.1349	62.3899
rs79269403	Age first had sexual intercourse	low back pain	A	G	0.0202286	0.230853	3	108036819	0.0158	3.50026e-15	ukb-b-6591	0.000145314	59.0721	62.3899
rs794375	Age first had sexual intercourse	low back pain	C	T	0.0155464	0.42645	7	75147801	0.0135	1.29987e-12	ukb-b-6591	0.00011823	48.061	62.3899
rs8003519	Age first had sexual intercourse	low back pain	G	A	-0.0149416	0.581483	14	93826672	0.0136	9.3994e-12	ukb-b-6591	0.000108661	44.1707	62.3899
rs800532	Age first had sexual intercourse	low back pain	G	A	-0.0156462	0.776043	8	116842110	0.0154	1.5e-09	ukb-b-6591	8.50939e-05	34.5898	62.3899
rs803679	Age first had sexual intercourse	low back pain	A	G	0.0197133	0.792617	1	44349405	0.0163	1.10002e-13	ukb-b-6591	0.000127757	51.9342	62.3899
rs807478	Age first had sexual intercourse	low back pain	G	A	0.0142362	0.497201	19	36252494	0.0135	4.60045e-11	ukb-b-6591	0.000101332	41.1909	62.3899
rs8096225	Age first had sexual intercourse	low back pain	C	A	-0.0132106	0.694761	18	36921851	0.0158	1.79999e-08	ukb-b-6591	7.40202e-05	30.0881	62.3899
rs8133065	Age first had sexual intercourse	low back pain	G	C	0.013895	0.283251	21	31422507	0.0165	8.60003e-09	ukb-b-6591	7.83945e-05	31.8663	62.3899
rs838039	Age first had sexual intercourse	low back pain	A	G	0.0147669	0.686798	2	140342288	0.0138	2.1e-10	ukb-b-6591	9.38128e-05	38.1343	62.3899
rs9491228	Age first had sexual intercourse	low back pain	C	T	-0.0141344	0.528945	6	125061384	0.0147	6.70039e-11	ukb-b-6591	9.95559e-05	40.469	62.3899
rs9536961	Age first had sexual intercourse	low back pain	G	A	0.0130856	0.348212	13	55678332	0.014	1.2e-08	ukb-b-6591	7.77262e-05	31.5947	62.3899
rs9538248	Age first had sexual intercourse	low back pain	A	C	-0.0156218	0.320928	13	59492828	0.0148	1.29987e-11	ukb-b-6591	0.000106369	43.2389	62.3899
rs9809849	Age first had sexual intercourse	low back pain	A	G	-0.0141765	0.425234	3	3726156	0.0142	8.69961e-11	ukb-b-6591	9.82397e-05	39.9339	62.3899
rs9866968	Age first had sexual intercourse	low back pain	A	G	0.0244328	0.349391	3	85683470	0.0139	6.29941e-27	ukb-b-6591	0.000271399	110.341	62.3899
rs9873182	Age first had sexual intercourse	low back pain	G	C	-0.0257397	0.841159	3	88250597	0.0177	2.29985e-18	ukb-b-6591	0.000177043	71.9726	62.3899
rs9886840	Age first had sexual intercourse	low back pain	G	A	0.0125283	0.580117	9	124602728	0.0138	1e-08	ukb-b-6591	7.64642e-05	31.0816	62.3899
rs9891146	Age first had sexual intercourse	low back pain	C	T	0.0142035	0.734943	17	65988049	0.0148	6.29999e-09	ukb-b-6591	7.85984e-05	31.9492	62.3899
rs9904818	Age first had sexual intercourse	low back pain	C	G	0.0223466	0.090226	17	77793292	0.0254	3.29997e-09	ukb-b-6591	8.19819e-05	33.3247	62.3899
rs9923553	Age first had sexual intercourse	low back pain	G	A	-0.0143033	0.290128	16	5825579	0.0156	1.7e-09	ukb-b-6591	8.42698e-05	34.2548	62.3899
rs993700	Age first had sexual intercourse	low back pain	C	T	0.0162142	0.77749	4	67825894	0.016	3.79997e-10	ukb-b-6591	9.09631e-05	36.9758	62.3899
