# Supplementary material for: A causal examination of the correlation between hormonal and reproductive factors and low back pain
Source: Front Endocrinol (Lausanne). 2024 May 10;15:1326761. doi: 10.3389/fendo.2024.1326761 (PMC11116661; doi:10.3389/fendo.2024.1326761)
Supplement: Supplementary Table S7 — SNPs of BMI for LBP in MR. [file Table_7.xlsx]

## Sheet: Sheet1
Supplementary Table 7 SNPs used as valid instrumental variables for BMI on LBP
SNP	exposure	outcome	effect_allele.exposure	other_allele.exposure	beta.exposure	eaf.exposure	chr	pos	se.outcome	pval.exposure	id.exposure	R2	F	FMean
rs10009336	Body mass index	low back pain	T	C	-0.014	0.1638	4	44480783	0.0182	2.19999e-10	ieu-b-40	5.36921e-05	42.6748	62.3899
rs1006896	Body mass index	low back pain	C	A	-0.0234	0.1061	3	88104411	0.0223	5.50047e-18	ieu-b-40	0.000103864	71.8701	62.3899
rs10132280	Body mass index	low back pain	A	C	-0.0223	0.3017	14	25928179	0.0141	5.60015e-35	ieu-b-40	0.000209535	164.85	62.3899
rs10169594	Body mass index	low back pain	C	T	0.0121	0.3596	2	41637688	0.014	1.99986e-11	ieu-b-40	6.74329e-05	46.2425	62.3899
rs10182181	Body mass index	low back pain	G	A	0.0325	0.4753	2	25150296	0.0137	6.70039e-90	ieu-b-40	0.000526836	417.532	62.3899
rs10192119	Body mass index	low back pain	G	T	0.0166	0.1673	2	164581241	0.0168	2.99985e-14	ieu-b-40	7.67769e-05	61.0705	62.3899
rs10197031	Body mass index	low back pain	C	T	0.0166	0.2834	2	105454590	0.0142	1.9002e-18	ieu-b-40	0.000111924	77.4015	62.3899
rs10243319	Body mass index	low back pain	C	T	-0.0107	0.3939	7	147674678	0.0136	1.2e-09	ieu-b-40	5.46673e-05	37.7736	62.3899
rs10247983	Body mass index	low back pain	A	G	0.0201	0.9213	7	114590228	0.0244	1.7e-09	ieu-b-40	5.85865e-05	39.3964	62.3899
rs10248136	Body mass index	low back pain	T	C	-0.0097	0.5142	7	39077397	0.0135	2e-08	ieu-b-40	4.70071e-05	32.2902	62.3899
rs10269783	Body mass index	low back pain	A	G	0.0133	0.3896	7	49616203	0.0135	1.39991e-15	ieu-b-40	8.41331e-05	66.5169	62.3899
rs10408324	Body mass index	low back pain	T	C	-0.0124	0.2744	19	51774806	0.0146	9.49948e-11	ieu-b-40	6.12287e-05	42.2954	62.3899
rs10478110	Body mass index	low back pain	C	A	0.01	0.4348	5	112445734	0.0135	9.59997e-09	ieu-b-40	4.91498e-05	33.4451	62.3899
rs1048932	Body mass index	low back pain	A	C	-0.016	0.4162	11	115044850	0.0136	3.80014e-22	ieu-b-40	0.000124405	98.9344	62.3899
rs10492229	Body mass index	low back pain	T	C	0.0142	0.2268	12	110602173	0.0152	7.70016e-14	ieu-b-40	7.07199e-05	56.2152	62.3899
rs10510419	Body mass index	low back pain	T	G	-0.0177	0.1416	3	12426936	0.0192	2.19989e-14	ieu-b-40	7.61604e-05	60.1192	62.3899
rs10518694	Body mass index	low back pain	A	C	0.0146	0.1424	15	53072673	0.0219	3.29997e-09	ieu-b-40	5.20632e-05	35.9542	62.3899
rs1064213	Body mass index	low back pain	A	G	0.012	0.492	2	198950240	0.0138	2.39994e-12	ieu-b-40	7.19816e-05	49.8562	62.3899
rs10733051	Body mass index	low back pain	G	A	-0.0097	0.4802	1	167280354	0.0136	2.90001e-09	ieu-b-40	4.69712e-05	36.7297	62.3899
rs10742752	Body mass index	low back pain	C	T	0.0124	0.6159	11	45438374	0.0136	1.10002e-13	ieu-b-40	7.27491e-05	57.6726	62.3899
rs10747488	Body mass index	low back pain	A	C	-0.0123	0.7601	1	98299475	0.0145	1.2e-09	ieu-b-40	5.51749e-05	38.0337	62.3899
rs10750215	Body mass index	low back pain	T	G	0.0108	0.3883	11	122505344	0.0139	1.29999e-10	ieu-b-40	5.54094e-05	43.7145	62.3899
rs1075901	Body mass index	low back pain	C	T	0.0121	0.5639	17	15943910	0.0138	1.20005e-13	ieu-b-40	7.20094e-05	57.2362	62.3899
rs10768994	Body mass index	low back pain	C	T	-0.0114	0.4337	11	43936945	0.0137	6.4003e-12	ieu-b-40	6.38375e-05	50.5423	62.3899
rs10795422	Body mass index	low back pain	G	A	0.0139	0.6905	10	16759312	0.0151	9.30037e-14	ieu-b-40	8.25817e-05	57.16	62.3899
rs10811871	Body mass index	low back pain	G	A	-0.0108	0.3829	9	23200766	0.0139	1.6e-09	ieu-b-40	5.51212e-05	37.8358	62.3899
rs10858334	Body mass index	low back pain	G	C	0.0143	0.1415	9	137989785	0.0255	2.69998e-08	ieu-b-40	4.9682e-05	33.4196	62.3899
rs10867256	Body mass index	low back pain	T	C	-0.0118	0.553	9	81367391	0.0139	8.69961e-12	ieu-b-40	6.88377e-05	47.4663	62.3899
rs10878946	Body mass index	low back pain	T	C	-0.0141	0.714	12	69642315	0.0141	3.59998e-13	ieu-b-40	8.11956e-05	55.6807	62.3899
rs10914462	Body mass index	low back pain	G	A	-0.0112	0.4255	1	32125943	0.0136	1.5e-10	ieu-b-40	6.13276e-05	42.3067	62.3899
rs10915840	Body mass index	low back pain	A	G	-0.0118	0.283	1	225668524	0.0161	1.29999e-09	ieu-b-40	5.65067e-05	38.7011	62.3899
rs10920678	Body mass index	low back pain	G	A	-0.0155	0.5709	1	190239907	0.0135	1.50003e-21	ieu-b-40	0.00011771	92.8393	62.3899
rs10938397	Body mass index	low back pain	G	A	0.0324	0.4317	4	45182527	0.0135	3.40017e-86	ieu-b-40	0.000515086	408.94	62.3899
rs10942267	Body mass index	low back pain	G	A	-0.0156	0.3088	5	80841914	0.0163	3.90032e-17	ieu-b-40	0.000103887	71.5939	62.3899
rs10953740	Body mass index	low back pain	G	A	-0.0153	0.5534	7	113460282	0.0135	1e-18	ieu-b-40	0.00011571	79.203	62.3899
rs10962550	Body mass index	low back pain	C	G	0.0182	0.1801	9	16720329	0.0179	6.20012e-16	ieu-b-40	9.78244e-05	67.5619	62.3899
rs10968114	Body mass index	low back pain	C	A	-0.0113	0.4681	9	27800007	0.0135	6.09958e-11	ieu-b-40	6.35851e-05	43.6236	62.3899
rs10971709	Body mass index	low back pain	T	C	0.0132	0.2062	9	33804813	0.0175	6.19998e-10	ieu-b-40	5.70398e-05	39.2633	62.3899
rs10984756	Body mass index	low back pain	G	C	0.0174	0.1048	9	122651784	0.0246	1.09999e-09	ieu-b-40	5.6808e-05	39.1949	62.3899
rs11030618	Body mass index	low back pain	T	C	0.011	0.5679	11	29243293	0.0135	2.39999e-10	ieu-b-40	5.93843e-05	40.9778	62.3899
rs11066188	Body mass index	low back pain	A	G	-0.012	0.4181	12	112610714	0.0139	8.10028e-13	ieu-b-40	7.00682e-05	55.5507	62.3899
rs11084553	Body mass index	low back pain	G	A	-0.021	0.1518	19	31019780	0.0201	1.80011e-18	ieu-b-40	0.000113563	78.4927	62.3899
rs11105839	Body mass index	low back pain	A	T	-0.0109	0.3799	12	91237920	0.0141	1.09999e-10	ieu-b-40	5.59776e-05	43.7529	62.3899
rs11115176	Body mass index	low back pain	C	T	-0.0121	0.2399	12	82465797	0.0162	2e-10	ieu-b-40	5.33951e-05	42.3116	62.3899
rs11118308	Body mass index	low back pain	G	A	-0.0101	0.4703	1	219633869	0.0136	4.79999e-10	ieu-b-40	5.0825e-05	40.3888	62.3899
rs1112613	Body mass index	low back pain	A	G	-0.0133	0.1762	13	53651850	0.017	3.40001e-09	ieu-b-40	5.13524e-05	35.066	62.3899
rs11150911	Body mass index	low back pain	C	A	-0.0133	0.7191	18	73498528	0.0147	4.70002e-13	ieu-b-40	7.14619e-05	55.8667	62.3899
rs11165643	Body mass index	low back pain	T	C	0.0206	0.5828	1	96924097	0.0138	1.39991e-35	ieu-b-40	0.000206361	163.607	62.3899
rs11170468	Body mass index	low back pain	C	A	-0.0123	0.2326	12	39430048	0.0173	1.89998e-10	ieu-b-40	5.40097e-05	42.9542	62.3899
rs11173522	Body mass index	low back pain	A	C	0.0128	0.2078	12	60953472	0.0171	1.09999e-09	ieu-b-40	5.39424e-05	37.3081	62.3899
rs11251352	Body mass index	low back pain	G	A	0.0109	0.5988	10	2585792	0.0135	7.00003e-10	ieu-b-40	5.70855e-05	39.437	62.3899
rs11496125	Body mass index	low back pain	T	C	0.0169	0.4212	7	103417557	0.0136	2.99985e-22	ieu-b-40	0.000139258	95.3454	62.3899
rs11505821	Body mass index	low back pain	T	A	0.0311	0.0601	7	76818677	0.0282	2.70023e-19	ieu-b-40	0.000109271	82.8718	62.3899
rs11538	Body mass index	low back pain	G	A	0.0135	0.1805	22	18220831	0.0171	3.29997e-09	ieu-b-40	5.39167e-05	37.3311	62.3899
rs1158805	Body mass index	low back pain	A	C	-0.0137	0.3766	18	40736590	0.0136	1.20005e-14	ieu-b-40	8.81289e-05	60.9706	62.3899
rs11609659	Body mass index	low back pain	C	T	-0.0154	0.2371	12	108296260	0.0155	2.19989e-14	ieu-b-40	8.57967e-05	58.276	62.3899
rs11611246	Body mass index	low back pain	T	G	0.024	0.21	12	939480	0.0165	5.00035e-32	ieu-b-40	0.000191117	149.065	62.3899
rs11615578	Body mass index	low back pain	T	C	0.013	0.2474	12	121714935	0.0162	8.10028e-11	ieu-b-40	6.29333e-05	42.1315	62.3899
rs11656076	Body mass index	low back pain	A	G	-0.0142	0.2254	17	31464270	0.0153	5.60015e-12	ieu-b-40	7.04106e-05	48.6769	62.3899
rs11672660	Body mass index	low back pain	T	C	-0.034	0.2049	19	46180184	0.0155	1.69981e-60	ieu-b-40	0.000376662	289.545	62.3899
rs11713193	Body mass index	low back pain	A	G	0.0239	0.5073	3	49924424	0.0138	2.39994e-44	ieu-b-40	0.000285544	197.698	62.3899
rs11736228	Body mass index	low back pain	T	A	-0.0139	0.2587	4	147376805	0.016	4.10015e-12	ieu-b-40	7.41054e-05	51.2535	62.3899
rs11738695	Body mass index	low back pain	A	C	0.0097	0.586	5	108699161	0.0137	2e-08	ieu-b-40	4.56532e-05	31.5651	62.3899
rs11739877	Body mass index	low back pain	T	C	0.0117	0.6118	5	105876806	0.0135	6.59933e-11	ieu-b-40	6.5023e-05	45.0338	62.3899
rs11781699	Body mass index	low back pain	C	T	0.0132	0.1896	8	118863061	0.015	3.09999e-10	ieu-b-40	5.35446e-05	42.0155	62.3899
rs11855853	Body mass index	low back pain	T	C	-0.0145	0.2649	15	78012618	0.0165	2.39994e-13	ieu-b-40	8.18831e-05	55.8949	62.3899
rs1187352	Body mass index	low back pain	C	T	0.0119	0.6518	9	87293457	0.0145	6.00067e-11	ieu-b-40	6.42787e-05	44.26	62.3899
rs11880870	Body mass index	low back pain	G	A	-0.0189	0.4801	19	18830704	0.0135	1e-28	ieu-b-40	0.000178322	127.942	62.3899
rs11889536	Body mass index	low back pain	G	A	-0.0189	0.1493	2	220163543	0.0309	6.4003e-15	ieu-b-40	9.07381e-05	62.522	62.3899
rs11908637	Body mass index	low back pain	A	G	-0.012	0.236	20	47428485	0.0151	4.90004e-09	ieu-b-40	5.19276e-05	35.9067	62.3899
rs11945861	Body mass index	low back pain	A	G	-0.0148	0.2369	4	65700865	0.0161	5.00035e-13	ieu-b-40	7.91954e-05	54.0511	62.3899
rs11951673	Body mass index	low back pain	T	C	-0.0123	0.3941	5	95861012	0.0147	1.10002e-13	ieu-b-40	7.22516e-05	57.2474	62.3899
rs12041258	Body mass index	low back pain	C	T	-0.0146	0.2287	1	195047936	0.0158	9.49948e-13	ieu-b-40	7.52013e-05	51.7875	62.3899
rs12044597	Body mass index	low back pain	G	A	0.0143	0.5029	1	1708801	0.0135	1.69981e-18	ieu-b-40	0.000102242	80.6894	62.3899
rs12049202	Body mass index	low back pain	T	C	0.024	0.203	1	77967523	0.015	1e-28	ieu-b-40	0.000186383	128.92	62.3899
rs12098284	Body mass index	low back pain	T	C	0.0178	0.1241	10	76047464	0.026	1.80011e-11	ieu-b-40	6.88805e-05	47.2666	62.3899
rs12150665	Body mass index	low back pain	C	T	-0.0162	0.4058	17	34914787	0.014	1.59993e-22	ieu-b-40	0.000126562	100.693	62.3899
rs1218822	Body mass index	low back pain	A	G	0.0168	0.6663	13	28011963	0.0143	1.9002e-22	ieu-b-40	0.000125509	99.7556	62.3899
rs12299814	Body mass index	low back pain	A	C	-0.0157	0.2525	12	90216146	0.0142	5.19996e-15	ieu-b-40	9.30469e-05	64.0185	62.3899
rs12328930	Body mass index	low back pain	C	T	0.0098	0.4235	2	175079125	0.014	1.79999e-08	ieu-b-40	4.68959e-05	32.384	62.3899
rs12334877	Body mass index	low back pain	A	G	-0.0144	0.198	8	67194171	0.0159	7.70016e-11	ieu-b-40	6.58559e-05	45.0364	62.3899
rs12364470	Body mass index	low back pain	G	T	0.0178	0.1626	11	134601012	0.0162	1.10002e-15	ieu-b-40	8.62827e-05	67.9456	62.3899
rs12369179	Body mass index	low back pain	T	C	-0.0359	0.08782	12	122963550	0.0244	2.49977e-31	ieu-b-40	0.000206487	139.254	62.3899
rs12416812	Body mass index	low back pain	A	G	0.0111	0.5088	11	888632	0.0136	6.09958e-12	ieu-b-40	6.15859e-05	48.8613	62.3899
rs1241986	Body mass index	low back pain	A	G	-0.0139	0.8479	18	6873954	0.0177	1.09999e-08	ieu-b-40	4.98349e-05	34.2759	62.3899
rs12422552	Body mass index	low back pain	C	G	-0.0134	0.2663	12	14413931	0.0165	1.59993e-11	ieu-b-40	7.01664e-05	48.386	62.3899
rs12429545	Body mass index	low back pain	A	G	0.0316	0.1248	13	54102206	0.0196	9.60064e-38	ieu-b-40	0.000218135	169.946	62.3899
rs12448257	Body mass index	low back pain	A	G	0.0184	0.218	16	3599655	0.0184	8.10028e-20	ieu-b-40	0.000115433	90.0047	62.3899
rs12546578	Body mass index	low back pain	A	T	0.0146	0.7246	8	85085268	0.0154	1e-13	ieu-b-40	8.50742e-05	58.6373	62.3899
rs12564992	Body mass index	low back pain	G	A	0.0196	0.1144	1	174478100	0.0247	5.30029e-14	ieu-b-40	7.78405e-05	61.8971	62.3899
rs12593036	Body mass index	low back pain	G	A	-0.0154	0.2993	15	81058652	0.0151	3.80014e-16	ieu-b-40	9.94742e-05	68.2513	62.3899
rs12602912	Body mass index	low back pain	T	C	0.0176	0.2048	17	65870073	0.0158	9.8992e-18	ieu-b-40	0.000100893	78.4531	62.3899
rs1260326	Body mass index	low back pain	C	T	0.0105	0.5973	2	27730940	0.0142	3.89996e-10	ieu-b-40	5.30375e-05	41.608	62.3899
rs12629015	Body mass index	low back pain	G	A	-0.0135	0.1852	3	119618053	0.0154	2.1e-09	ieu-b-40	5.50034e-05	38.0126	62.3899
rs1266874	Body mass index	low back pain	G	A	0.014	0.3558	6	51779638	0.0136	9.79941e-15	ieu-b-40	8.98489e-05	62.0928	62.3899
rs12675063	Body mass index	low back pain	T	A	0.0156	0.1131	8	132879047	0.0272	1.29999e-09	ieu-b-40	4.88221e-05	38.5601	62.3899
rs1268065	Body mass index	low back pain	A	G	-0.0102	0.4794	6	126042783	0.0135	1e-09	ieu-b-40	5.19317e-05	39.4506	62.3899
rs12680842	Body mass index	low back pain	G	A	-0.0133	0.3205	8	95582606	0.0137	4.40048e-14	ieu-b-40	7.70461e-05	60.2969	62.3899
rs12718572	Body mass index	low back pain	T	C	-0.0117	0.4024	7	50573325	0.0146	2.99985e-11	ieu-b-40	6.5837e-05	45.2015	62.3899
rs12762034	Body mass index	low back pain	C	T	0.024	0.07583	10	33969931	0.0229	7.29962e-14	ieu-b-40	8.07319e-05	55.8863	62.3899
rs12779328	Body mass index	low back pain	T	C	0.0105	0.2833	10	12943973	0.0162	4.49997e-08	ieu-b-40	4.47706e-05	30.9259	62.3899
rs1285997	Body mass index	low back pain	G	C	0.0142	0.7153	14	91513029	0.0153	1.20005e-13	ieu-b-40	8.21263e-05	56.1982	62.3899
rs12888545	Body mass index	low back pain	G	A	0.0136	0.2519	14	88308044	0.0159	9.09913e-12	ieu-b-40	6.97101e-05	48.0059	62.3899
rs12888955	Body mass index	low back pain	A	G	-0.0178	0.6513	14	103256877	0.0139	1.39991e-22	ieu-b-40	0.000143914	99.5808	62.3899
rs12905439	Body mass index	low back pain	G	C	-0.0118	0.3393	15	99521883	0.0143	1.40001e-10	ieu-b-40	6.24284e-05	42.1545	62.3899
rs12914489	Body mass index	low back pain	A	G	0.0165	0.1103	15	74187937	0.0196	3.79997e-10	ieu-b-40	5.34339e-05	42.4952	62.3899
rs12922346	Body mass index	low back pain	C	G	0.0136	0.2657	16	82438337	0.0169	1e-11	ieu-b-40	7.21727e-05	49.053	62.3899
rs12933482	Body mass index	low back pain	G	A	0.0186	0.1048	16	72189604	0.0286	4.90004e-11	ieu-b-40	6.49138e-05	44.8892	62.3899
rs12936083	Body mass index	low back pain	G	A	0.0139	0.3267	17	4801887	0.0137	4.10015e-13	ieu-b-40	8.49997e-05	53.8615	62.3899
rs12939549	Body mass index	low back pain	G	A	-0.018	0.4335	17	78611724	0.0142	2.70023e-28	ieu-b-40	0.000159134	126.365	62.3899
rs1296328	Body mass index	low back pain	C	A	-0.0179	0.5657	4	137083193	0.0135	4.90004e-24	ieu-b-40	0.000157439	107.624	62.3899
rs12981256	Body mass index	low back pain	A	G	0.0142	0.5325	19	1865901	0.0136	1.10002e-15	ieu-b-40	0.000100394	68.1066	62.3899
rs13021737	Body mass index	low back pain	G	A	0.0574	0.8319	2	632348	0.0184	7.49894e-157	ieu-b-40	0.000921494	728.22	62.3899
rs13069244	Body mass index	low back pain	A	G	0.0187	0.07747	3	180441172	0.032	2.99999e-09	ieu-b-40	4.99836e-05	39.5552	62.3899
rs13107325	Body mass index	low back pain	T	C	0.047	0.07373	4	103188709	0.0582	1.10002e-47	ieu-b-40	0.000301722	239.049	62.3899
rs13110266	Body mass index	low back pain	A	G	-0.0117	0.4065	4	162129844	0.0137	1.9002e-12	ieu-b-40	6.60515e-05	52.2558	62.3899
rs13132853	Body mass index	low back pain	G	A	-0.0142	0.3452	4	38680015	0.0139	4.70002e-15	ieu-b-40	9.11562e-05	62.2235	62.3899
rs13147390	Body mass index	low back pain	C	T	0.0103	0.3569	4	80712000	0.0147	1e-08	ieu-b-40	4.87001e-05	33.1678	62.3899
rs13174863	Body mass index	low back pain	G	A	0.0192	0.1548	5	139080745	0.019	2.90001e-16	ieu-b-40	9.64635e-05	74.6468	62.3899
rs13184896	Body mass index	low back pain	T	G	-0.0133	0.4346	5	122734005	0.0136	3.29989e-16	ieu-b-40	8.69318e-05	69.1014	62.3899
rs13191362	Body mass index	low back pain	G	A	-0.0236	0.1198	6	163033350	0.0283	5.90065e-21	ieu-b-40	0.000117461	93.1216	62.3899
rs1320903	Body mass index	low back pain	A	G	0.0216	0.3174	3	131758077	0.0148	9.20026e-32	ieu-b-40	0.000202167	139.83	62.3899
rs1321432	Body mass index	low back pain	C	A	0.0201	0.6321	20	6614691	0.0144	3.50026e-29	ieu-b-40	0.000187905	129.017	62.3899
rs13250058	Body mass index	low back pain	T	G	0.0112	0.6771	8	112270826	0.0145	2.90001e-10	ieu-b-40	5.48513e-05	43.218	62.3899
rs13263601	Body mass index	low back pain	C	A	0.0154	0.3478	8	14095900	0.0153	2.19989e-17	ieu-b-40	0.000107592	73.8372	62.3899
rs1327259	Body mass index	low back pain	G	A	-0.0155	0.3872	6	51177811	0.0136	1.69981e-18	ieu-b-40	0.000114011	78.2115	62.3899
rs13287131	Body mass index	low back pain	C	T	0.0123	0.2491	9	92119579	0.0151	6.80002e-10	ieu-b-40	5.65973e-05	38.7038	62.3899
rs13329567	Body mass index	low back pain	T	C	-0.0293	0.2308	15	68104367	0.0184	1e-50	ieu-b-40	0.000304818	242.084	62.3899
rs1365466	Body mass index	low back pain	T	C	-0.0137	0.7406	18	36182440	0.0171	3.29989e-13	ieu-b-40	7.21149e-05	57.1094	62.3899
rs1371108	Body mass index	low back pain	A	C	0.0119	0.3247	2	81816251	0.0148	8.99912e-11	ieu-b-40	6.21016e-05	42.5185	62.3899
rs1409818	Body mass index	low back pain	T	C	0.0201	0.1156	20	21381121	0.0273	2.49977e-12	ieu-b-40	8.26092e-05	57.0862	62.3899
rs1412235	Body mass index	low back pain	C	G	0.0246	0.3175	9	28410996	0.0139	6.00067e-45	ieu-b-40	0.000262269	207.285	62.3899
rs1421334	Body mass index	low back pain	C	A	-0.0125	0.5431	8	30865733	0.0138	1e-12	ieu-b-40	7.75445e-05	52.7858	62.3899
rs1430387	Body mass index	low back pain	C	T	-0.0114	0.4295	18	58227112	0.0135	5.79963e-11	ieu-b-40	6.36881e-05	43.9045	62.3899
rs1431659	Body mass index	low back pain	G	A	-0.0196	0.7344	8	73439070	0.0158	6.00067e-24	ieu-b-40	0.000149866	103.384	62.3899
rs1436344	Body mass index	low back pain	C	G	0.0141	0.5922	3	104606144	0.014	4.10015e-16	ieu-b-40	9.60249e-05	66.457	62.3899
rs1445652	Body mass index	low back pain	A	G	0.0123	0.1855	2	155668460	0.0199	4.30002e-08	ieu-b-40	4.57167e-05	31.1877	62.3899
rs1452075	Body mass index	low back pain	T	C	0.0141	0.7277	3	62481063	0.0149	1.29987e-14	ieu-b-40	7.87895e-05	61.7543	62.3899
rs1465900	Body mass index	low back pain	C	A	-0.0125	0.2188	11	76473138	0.0166	4.79999e-10	ieu-b-40	5.34145e-05	41.652	62.3899
rs1472169	Body mass index	low back pain	T	C	-0.0139	0.3772	9	37209396	0.0146	2.80027e-15	ieu-b-40	9.07778e-05	62.6372	62.3899
rs1476322	Body mass index	low back pain	A	G	0.0101	0.569	3	161446055	0.0135	5e-09	ieu-b-40	5.00337e-05	34.6511	62.3899
rs1477199	Body mass index	low back pain	G	A	0.0228	0.1451	16	53712135	0.0213	9.3994e-22	ieu-b-40	0.000128968	102.471	62.3899
rs1492767	Body mass index	low back pain	T	C	0.0094	0.4957	4	55221467	0.0137	1e-08	ieu-b-40	4.41767e-05	35.0849	62.3899
rs1503526	Body mass index	low back pain	C	T	0.014	0.4838	5	63020706	0.0137	5.50047e-17	ieu-b-40	9.78971e-05	73.1701	62.3899
rs1522569	Body mass index	low back pain	G	T	-0.0164	0.1819	4	171632637	0.0245	2.90001e-13	ieu-b-40	8.00492e-05	55.204	62.3899
rs1528435	Body mass index	low back pain	T	C	0.0164	0.6331	2	181550962	0.0141	9.09913e-23	ieu-b-40	0.00012495	99.2475	62.3899
rs1535660	Body mass index	low back pain	C	T	-0.0147	0.8554	9	10371073	0.0216	5.19996e-09	ieu-b-40	5.34567e-05	36.9204	62.3899
rs1538247	Body mass index	low back pain	C	T	0.0108	0.3181	6	153395344	0.0145	1e-08	ieu-b-40	5.06013e-05	34.5485	62.3899
rs1552893	Body mass index	low back pain	G	A	-0.0126	0.2777	3	194851700	0.0161	8.10028e-11	ieu-b-40	6.3689e-05	44.0317	62.3899
rs156201	Body mass index	low back pain	C	G	0.0123	0.7606	6	104847441	0.014	5.80003e-10	ieu-b-40	5.50961e-05	38.1194	62.3899
rs1656377	Body mass index	low back pain	C	T	0.0099	0.5885	3	158285280	0.0136	1.6e-08	ieu-b-40	4.74697e-05	32.8484	62.3899
rs1681740	Body mass index	low back pain	C	A	-0.0115	0.3933	10	118564313	0.0141	1.09999e-10	ieu-b-40	6.31137e-05	42.507	62.3899
rs16849710	Body mass index	low back pain	G	A	-0.0116	0.515	1	202106797	0.0135	6.00067e-11	ieu-b-40	6.72194e-05	44.7864	62.3899
rs16851483	Body mass index	low back pain	T	G	0.0369	0.06928	3	141275436	0.0314	3.19963e-26	ieu-b-40	0.000175594	121.588	62.3899
rs16871902	Body mass index	low back pain	A	G	0.0125	0.4877	5	3488462	0.0135	4.60045e-13	ieu-b-40	7.80777e-05	53.9425	62.3899
rs16903285	Body mass index	low back pain	C	T	0.0331	0.1407	5	87978252	0.0218	7.59976e-38	ieu-b-40	0.000264926	182.302	62.3899
rs17001561	Body mass index	low back pain	A	G	0.0151	0.1573	4	77096118	0.0211	3.80014e-11	ieu-b-40	6.04485e-05	48.0187	62.3899
rs17014375	Body mass index	low back pain	G	T	0.0172	0.1348	1	209543560	0.0222	1.10002e-11	ieu-b-40	6.9007e-05	47.6771	62.3899
rs17033117	Body mass index	low back pain	T	C	0.0137	0.1872	3	35443653	0.0181	8.9e-10	ieu-b-40	5.71164e-05	39.5189	62.3899
rs17056301	Body mass index	low back pain	C	T	0.0118	0.2636	5	158271680	0.0163	2.39999e-09	ieu-b-40	5.40572e-05	37.1978	62.3899
rs17113297	Body mass index	low back pain	T	C	0.0166	0.2082	10	102395982	0.0161	2.09991e-15	ieu-b-40	9.08537e-05	62.3635	62.3899
rs17119937	Body mass index	low back pain	C	T	0.0212	0.06905	8	14502274	0.0301	5.60003e-09	ieu-b-40	5.77819e-05	38.6161	62.3899
rs17203016	Body mass index	low back pain	G	A	0.015	0.196	2	208255518	0.0168	2.09991e-13	ieu-b-40	7.09128e-05	55.7606	62.3899
rs17207196	Body mass index	low back pain	T	C	-0.0221	0.4118	7	75101065	0.0135	2.09991e-35	ieu-b-40	0.000236606	158.301	62.3899
rs17238110	Body mass index	low back pain	G	A	-0.0353	0.1634	15	62150364	0.0219	1.99986e-12	ieu-b-40	0.000340682	264.29	62.3899
rs17311369	Body mass index	low back pain	T	C	-0.0104	0.3278	15	47709199	0.0148	3.09999e-08	ieu-b-40	4.76655e-05	32.0852	62.3899
rs17399237	Body mass index	low back pain	C	T	-0.0129	0.5497	2	35471626	0.0138	6.70039e-14	ieu-b-40	8.23829e-05	56.927	62.3899
rs17405819	Body mass index	low back pain	C	T	-0.0215	0.301	8	76806584	0.0149	4.30031e-33	ieu-b-40	0.000194514	154.764	62.3899
rs17424296	Body mass index	low back pain	A	G	-0.0108	0.3659	5	60838903	0.0144	2.39999e-09	ieu-b-40	5.4125e-05	37.0432	62.3899
rs17425707	Body mass index	low back pain	C	T	0.0167	0.1003	1	57874879	0.027	4.39997e-09	ieu-b-40	5.0334e-05	34.6751	62.3899
rs17446257	Body mass index	low back pain	A	G	0.0153	0.1292	13	40749213	0.0185	2.90001e-09	ieu-b-40	5.26737e-05	36.3798	62.3899
rs17499593	Body mass index	low back pain	G	C	0.0125	0.1897	2	172649755	0.0202	1.09999e-08	ieu-b-40	4.80356e-05	33.2259	62.3899
rs17513613	Body mass index	low back pain	C	T	0.0186	0.3236	19	30286822	0.0142	3.59998e-26	ieu-b-40	0.00015145	119.599	62.3899
rs175165	Body mass index	low back pain	G	T	-0.0103	0.3941	22	20116015	0.0136	5.19996e-09	ieu-b-40	5.06654e-05	34.9884	62.3899
rs17535749	Body mass index	low back pain	A	G	0.015	0.1023	3	10027724	0.0243	2.5e-08	ieu-b-40	4.13256e-05	32.1128	62.3899
rs17551974	Body mass index	low back pain	A	C	-0.0141	0.1782	2	142293146	0.0165	1.89998e-10	ieu-b-40	5.82294e-05	40.2454	62.3899
rs17663412	Body mass index	low back pain	A	C	0.0157	0.1139	5	167595121	0.0254	6.1e-09	ieu-b-40	4.97549e-05	34.3831	62.3899
rs17710386	Body mass index	low back pain	C	T	0.0126	0.3319	18	63461201	0.0139	1e-12	ieu-b-40	7.04076e-05	55.19	62.3899
rs17724992	Body mass index	low back pain	G	A	-0.0183	0.2596	19	18454825	0.0162	1e-22	ieu-b-40	0.000128737	101.181	62.3899
rs17789218	Body mass index	low back pain	C	T	0.013	0.2392	6	100600097	0.0166	7.39946e-12	ieu-b-40	6.15104e-05	48.8362	62.3899
rs17806379	Body mass index	low back pain	T	C	-0.0258	0.1789	20	51107290	0.0187	1.50003e-30	ieu-b-40	0.000195558	134.969	62.3899
rs1784460	Body mass index	low back pain	A	T	0.0132	0.4035	11	118938371	0.0149	8.99912e-14	ieu-b-40	8.38749e-05	57.043	62.3899
rs1804528	Body mass index	low back pain	A	G	0.0109	0.3507	4	146056320	0.0138	2.99999e-08	ieu-b-40	5.41083e-05	28.0758	62.3899
rs1830074	Body mass index	low back pain	C	T	0.0115	0.288	7	6718674	0.0145	1.40001e-09	ieu-b-40	5.42373e-05	37.4208	62.3899
rs1836303	Body mass index	low back pain	G	A	0.0116	0.3873	15	46539116	0.0145	5.30029e-11	ieu-b-40	6.38618e-05	44.0029	62.3899
rs1843328	Body mass index	low back pain	A	C	-0.0099	0.5085	12	17111188	0.0135	7.90005e-09	ieu-b-40	4.89908e-05	33.6491	62.3899
rs1863652	Body mass index	low back pain	A	G	-0.0115	0.3449	4	95991417	0.0148	1.40001e-10	ieu-b-40	5.97622e-05	41.39	62.3899
rs1884389	Body mass index	low back pain	T	C	-0.0103	0.4289	20	1410582	0.0136	4e-09	ieu-b-40	5.19724e-05	35.5337	62.3899
rs1885728	Body mass index	low back pain	A	G	0.0108	0.6787	6	5977833	0.0145	1e-08	ieu-b-40	5.08705e-05	34.7114	62.3899
rs1891216	Body mass index	low back pain	G	T	0.0107	0.3759	1	7728391	0.0137	2.39999e-09	ieu-b-40	5.37185e-05	36.8033	62.3899
rs1896767	Body mass index	low back pain	A	G	-0.0109	0.5376	16	62838304	0.0135	2.39999e-10	ieu-b-40	5.90691e-05	40.5391	62.3899
rs1927790	Body mass index	low back pain	C	T	0.0148	0.4109	13	96922191	0.0135	1.80011e-19	ieu-b-40	0.000106042	84.2408	62.3899
rs1928295	Body mass index	low back pain	C	T	-0.0141	0.4461	9	120378483	0.0135	5.40008e-18	ieu-b-40	9.82498e-05	77.9833	62.3899
rs1937683	Body mass index	low back pain	T	C	0.0109	0.6699	10	53679060	0.0143	3.2e-09	ieu-b-40	5.25459e-05	36.3919	62.3899
rs1948080	Body mass index	low back pain	G	T	-0.0137	0.3749	9	11852043	0.0147	1.10002e-14	ieu-b-40	8.79703e-05	60.7604	62.3899
rs1982441	Body mass index	low back pain	T	G	0.0175	0.1381	8	28021769	0.0174	7.00003e-12	ieu-b-40	7.29049e-05	50.1406	62.3899
rs1982725	Body mass index	low back pain	T	C	0.0097	0.4778	19	30618771	0.0135	3.29997e-08	ieu-b-40	4.69523e-05	32.0771	62.3899
rs1993709	Body mass index	low back pain	G	A	0.0331	0.8177	1	72838529	0.0195	1.9002e-57	ieu-b-40	0.000326638	256.821	62.3899
rs2007231	Body mass index	low back pain	T	C	-0.0104	0.6387	1	115266306	0.0147	5.19996e-09	ieu-b-40	4.99185e-05	34.5437	62.3899
rs200810	Body mass index	low back pain	C	T	-0.0136	0.3716	6	97922184	0.0138	5.50047e-16	ieu-b-40	8.63813e-05	68.5665	62.3899
rs2009416	Body mass index	low back pain	T	C	-0.0121	0.361	5	92415111	0.0136	1.10002e-11	ieu-b-40	6.75474e-05	46.7283	62.3899
rs2033529	Body mass index	low back pain	G	A	0.0205	0.2936	6	40348653	0.0143	1.9002e-30	ieu-b-40	0.000174319	138.104	62.3899
rs2051559	Body mass index	low back pain	C	T	0.0176	0.1308	4	3298800	0.0217	5.00035e-12	ieu-b-40	7.04341e-05	48.554	62.3899
rs2065418	Body mass index	low back pain	G	T	-0.0166	0.3623	11	30422068	0.0147	3.59998e-20	ieu-b-40	0.00012733	88.0861	62.3899
rs208015	Body mass index	low back pain	C	T	-0.0356	0.9216	17	46252346	0.0214	1.39991e-25	ieu-b-40	0.000183142	126.679	62.3899
rs2124499	Body mass index	low back pain	C	G	-0.0123	0.3718	3	123093541	0.0141	3.40017e-13	ieu-b-40	7.0672e-05	55.5488	62.3899
rs2143253	Body mass index	low back pain	A	G	-0.0188	0.1189	20	41987392	0.0225	1.10002e-12	ieu-b-40	7.40547e-05	50.7133	62.3899
rs215634	Body mass index	low back pain	G	A	-0.0152	0.6212	7	32369148	0.0151	2.60016e-17	ieu-b-40	0.000108732	74.0867	62.3899
rs2162524	Body mass index	low back pain	C	T	0.0155	0.3321	2	230817437	0.0147	4.10015e-17	ieu-b-40	0.00010658	73.6863	62.3899
rs217671	Body mass index	low back pain	G	A	0.0144	0.2719	14	62360464	0.0166	1.29987e-13	ieu-b-40	8.21023e-05	56.7746	62.3899
rs2228213	Body mass index	low back pain	A	G	-0.0139	0.3481	6	12124855	0.0142	4.60045e-16	ieu-b-40	8.76889e-05	69.7708	62.3899
rs2235564	Body mass index	low back pain	T	C	0.0131	0.3466	1	6713114	0.0142	3.69999e-13	ieu-b-40	7.77285e-05	53.7567	62.3899
rs2246012	Body mass index	low back pain	C	T	0.0158	0.1628	6	131898208	0.016	3.10027e-13	ieu-b-40	6.80499e-05	54.1439	62.3899
rs2283093	Body mass index	low back pain	T	C	0.0127	0.2066	7	126721231	0.0173	3.09999e-09	ieu-b-40	5.28762e-05	36.5801	62.3899
rs2285178	Body mass index	low back pain	C	T	0.0112	0.3109	22	38205989	0.0144	9.40005e-09	ieu-b-40	5.37488e-05	34.3079	62.3899
rs2306537	Body mass index	low back pain	G	A	0.0133	0.3092	12	133423695	0.0154	8.69961e-13	ieu-b-40	7.55658e-05	52.2895	62.3899
rs2307111	Body mass index	low back pain	C	T	-0.0265	0.3962	5	75003678	0.0137	1.59993e-58	ieu-b-40	0.000335992	267.348	62.3899
rs2317299	Body mass index	low back pain	C	T	-0.0106	0.5597	2	236903093	0.0136	1.29999e-09	ieu-b-40	5.53791e-05	37.548	62.3899
rs2325036	Body mass index	low back pain	C	A	-0.0181	0.3845	3	85819412	0.0136	3.59998e-27	ieu-b-40	0.000155064	122.654	62.3899
rs2357760	Body mass index	low back pain	A	G	0.0145	0.6754	6	120213880	0.0143	6.79986e-17	ieu-b-40	9.21883e-05	72.9323	62.3899
rs2361988	Body mass index	low back pain	C	T	-0.0155	0.2539	16	398151	0.0168	5.19996e-15	ieu-b-40	9.10234e-05	62.8345	62.3899
rs2365389	Body mass index	low back pain	T	C	-0.0174	0.4143	3	61236462	0.0136	1.29987e-25	ieu-b-40	0.000146933	115.157	62.3899
rs2367112	Body mass index	low back pain	G	T	-0.0119	0.4919	5	64168193	0.0135	2.29985e-13	ieu-b-40	7.07864e-05	56.2298	62.3899
rs2423668	Body mass index	low back pain	C	T	-0.0105	0.5505	20	12430673	0.0136	2.80001e-08	ieu-b-40	5.45627e-05	28.7752	62.3899
rs2425840	Body mass index	low back pain	C	A	0.0119	0.4059	20	44904838	0.0143	1.59993e-11	ieu-b-40	6.82971e-05	46.5598	62.3899
rs2429150	Body mass index	low back pain	C	A	0.0111	0.4164	12	2152655	0.0135	2.69998e-10	ieu-b-40	5.98828e-05	41.0985	62.3899
rs2479958	Body mass index	low back pain	G	A	-0.0154	0.5075	13	111984244	0.0135	1.50003e-17	ieu-b-40	0.000118553	78.7603	62.3899
rs2481665	Body mass index	low back pain	C	T	-0.0161	0.4408	1	62594677	0.0141	7.19946e-23	ieu-b-40	0.000127788	101.636	62.3899
rs2543132	Body mass index	low back pain	C	G	0.0146	0.8134	8	15536311	0.0185	5.00035e-11	ieu-b-40	6.4707e-05	44.5423	62.3899
rs2600226	Body mass index	low back pain	T	C	-0.0116	0.6697	3	12928762	0.0141	3.69999e-10	ieu-b-40	5.95299e-05	40.7972	62.3899
rs2605603	Body mass index	low back pain	A	G	-0.0103	0.4887	11	93221105	0.0135	2.5e-10	ieu-b-40	5.30179e-05	41.9317	62.3899
rs2608703	Body mass index	low back pain	A	C	0.0142	0.4546	12	41846769	0.0136	1.9002e-16	ieu-b-40	9.99888e-05	68.669	62.3899
rs262130	Body mass index	low back pain	T	C	0.0127	0.1969	6	142853486	0.0167	1.79999e-08	ieu-b-40	5.10097e-05	34.6649	62.3899
rs2693826	Body mass index	low back pain	A	G	-0.0137	0.4421	2	6160943	0.0135	1.99986e-15	ieu-b-40	9.25866e-05	63.9653	62.3899
rs2694047	Body mass index	low back pain	G	A	0.0188	0.747	8	116750548	0.0149	3.90032e-21	ieu-b-40	0.000133594	92.2313	62.3899
rs273504	Body mass index	low back pain	G	A	0.0153	0.4266	19	18215247	0.0135	4.40048e-18	ieu-b-40	0.000114523	79.1064	62.3899
rs2791653	Body mass index	low back pain	G	A	-0.0141	0.7577	1	11129848	0.0162	1.29987e-13	ieu-b-40	7.29993e-05	58.0583	62.3899
rs2820311	Body mass index	low back pain	G	A	0.0235	0.3369	1	201841476	0.0148	4.10015e-38	ieu-b-40	0.000246744	170.758	62.3899
rs2832283	Body mass index	low back pain	A	G	0.0115	0.2208	21	30690558	0.0154	5.80003e-09	ieu-b-40	4.55065e-05	36.0575	62.3899
rs2836964	Body mass index	low back pain	C	T	-0.011	0.3576	21	40631006	0.016	1.29999e-09	ieu-b-40	5.55928e-05	38.4919	62.3899
rs2861683	Body mass index	low back pain	C	A	-0.0144	0.407	2	67836507	0.0137	1.29987e-16	ieu-b-40	0.000100093	69.1874	62.3899
rs2868975	Body mass index	low back pain	A	G	-0.0143	0.178	3	116935323	0.016	2.19999e-10	ieu-b-40	5.98403e-05	41.3289	62.3899
rs287104	Body mass index	low back pain	A	G	0.0115	0.6604	19	34290995	0.0136	4.40048e-11	ieu-b-40	5.93199e-05	46.7056	62.3899
rs2875762	Body mass index	low back pain	C	G	0.0139	0.2473	6	124925032	0.0217	1.20005e-11	ieu-b-40	7.19293e-05	49.2893	62.3899
rs2907948	Body mass index	low back pain	A	G	-0.0141	0.2427	7	150638484	0.0181	1.29987e-13	ieu-b-40	7.30812e-05	58.0525	62.3899
rs2931434	Body mass index	low back pain	T	C	-0.0104	0.3168	5	73159098	0.0147	1.40001e-08	ieu-b-40	4.68198e-05	32.3382	62.3899
rs2943465	Body mass index	low back pain	C	T	0.0248	0.9444	12	19265921	0.0252	2e-10	ieu-b-40	6.45898e-05	44.3467	62.3899
rs294704	Body mass index	low back pain	T	G	-0.0113	0.7239	5	152519088	0.016	4e-09	ieu-b-40	5.10425e-05	35.2229	62.3899
rs3007105	Body mass index	low back pain	T	C	0.0142	0.4697	14	47367616	0.0142	1.10002e-17	ieu-b-40	0.00010045	78.9098	62.3899
rs326896	Body mass index	low back pain	T	C	-0.0128	0.3925	4	112669571	0.0144	2.80027e-13	ieu-b-40	7.81332e-05	53.9413	62.3899
rs331966	Body mass index	low back pain	C	A	0.0112	0.3792	4	143675717	0.0141	3.2e-10	ieu-b-40	5.9059e-05	40.587	62.3899
rs33500	Body mass index	low back pain	T	C	-0.0167	0.8082	3	42427191	0.0174	4.30031e-14	ieu-b-40	8.6463e-05	59.6212	62.3899
rs339991	Body mass index	low back pain	G	A	0.0124	0.5631	15	60913637	0.0139	1.20005e-12	ieu-b-40	7.56556e-05	51.9395	62.3899
rs349088	Body mass index	low back pain	A	C	-0.0128	0.4976	11	84814393	0.014	1.80011e-13	ieu-b-40	8.19181e-05	56.0693	62.3899
rs3731695	Body mass index	low back pain	C	T	0.0116	0.5582	2	203820275	0.0136	7.89951e-13	ieu-b-40	6.63684e-05	52.6721	62.3899
rs3732084	Body mass index	low back pain	C	T	0.0107	0.6139	2	207174316	0.0135	1.09999e-09	ieu-b-40	5.42744e-05	37.5469	62.3899
rs3736485	Body mass index	low back pain	G	A	-0.0134	0.5443	15	51748610	0.0137	2.49977e-16	ieu-b-40	8.90752e-05	70.4115	62.3899
rs3749897	Body mass index	low back pain	T	C	0.0122	0.4172	6	42532102	0.0135	8.4004e-12	ieu-b-40	7.23792e-05	46.1973	62.3899
rs3754963	Body mass index	low back pain	T	A	-0.0123	0.2574	2	166185707	0.0147	3.29997e-10	ieu-b-40	5.78367e-05	39.9983	62.3899
rs3764835	Body mass index	low back pain	A	G	-0.0141	0.1528	2	159519368	0.0174	3.09999e-09	ieu-b-40	5.14728e-05	35.4925	62.3899
rs3772882	Body mass index	low back pain	A	C	0.0127	0.3661	3	81808602	0.0136	6.59933e-13	ieu-b-40	7.48614e-05	51.8012	62.3899
rs3800229	Body mass index	low back pain	T	G	0.0175	0.7123	6	108996963	0.014	1.39991e-22	ieu-b-40	0.000125519	99.4826	62.3899
rs3800637	Body mass index	low back pain	C	T	0.0115	0.336	7	137403432	0.0143	5.1e-10	ieu-b-40	5.9011e-05	40.2478	62.3899
rs3806114	Body mass index	low back pain	A	G	-0.0113	0.6773	6	20482335	0.0158	3.40001e-10	ieu-b-40	5.58171e-05	43.4757	62.3899
rs3806572	Body mass index	low back pain	A	G	-0.0145	0.2788	2	55238677	0.0157	1.59993e-14	ieu-b-40	8.45502e-05	58.1453	62.3899
rs3807645	Body mass index	low back pain	A	G	-0.0166	0.221	7	77830091	0.0168	2.39994e-15	ieu-b-40	9.48803e-05	64.8173	62.3899
rs380857	Body mass index	low back pain	A	C	-0.0151	0.8878	9	101491066	0.0176	3.59998e-08	ieu-b-40	4.54247e-05	31.4128	62.3899
rs3814883	Body mass index	low back pain	T	C	0.0232	0.4764	16	29994922	0.0137	1.10002e-40	ieu-b-40	0.00026852	184.125	62.3899
rs3828783	Body mass index	low back pain	A	G	-0.0165	0.1809	6	33767727	0.0162	5.60015e-15	ieu-b-40	8.06814e-05	63.9651	62.3899
rs3829849	Body mass index	low back pain	T	C	0.0098	0.3589	9	129390800	0.014	5.89997e-09	ieu-b-40	4.41958e-05	35.0864	62.3899
rs38314	Body mass index	low back pain	A	G	-0.012	0.4912	7	70067315	0.0135	4.70002e-12	ieu-b-40	7.19777e-05	49.6523	62.3899
rs3844598	Body mass index	low back pain	G	A	0.0095	0.521	5	140992235	0.0136	3.79997e-08	ieu-b-40	4.50454e-05	31.1143	62.3899
rs3904244	Body mass index	low back pain	A	T	0.0155	0.1377	10	27361527	0.0159	4.30002e-10	ieu-b-40	5.7054e-05	39.4367	62.3899
rs391300	Body mass index	low back pain	C	T	-0.0119	0.6275	17	2216258	0.0139	3.10027e-12	ieu-b-40	6.62009e-05	52.3762	62.3899
rs3935648	Body mass index	low back pain	G	C	-0.0125	0.2328	17	79085335	0.0177	6.80002e-09	ieu-b-40	5.58138e-05	35.1256	62.3899
rs3977755	Body mass index	low back pain	T	C	-0.0135	0.2804	10	104420210	0.0167	5.90065e-13	ieu-b-40	7.35473e-05	53.8058	62.3899
rs40067	Body mass index	low back pain	A	G	-0.0266	0.1713	5	107439012	0.0166	7.10068e-30	ieu-b-40	0.000200885	136.97	62.3899
rs4012234	Body mass index	low back pain	G	T	0.0141	0.5924	20	32553047	0.0141	9.8992e-16	ieu-b-40	9.60102e-05	66.2199	62.3899
rs4072917	Body mass index	low back pain	A	G	0.0115	0.4694	8	143300279	0.0136	6.89922e-11	ieu-b-40	6.58773e-05	45.1104	62.3899
rs4148155	Body mass index	low back pain	G	A	-0.0188	0.1127	4	89054667	0.0259	5.00035e-13	ieu-b-40	7.06871e-05	56.1922	62.3899
rs4148866	Body mass index	low back pain	T	C	0.0098	0.4068	12	123425575	0.0139	4e-08	ieu-b-40	4.63515e-05	31.3544	62.3899
rs4237643	Body mass index	low back pain	G	T	-0.0223	0.6938	11	43648368	0.0146	4.30031e-33	ieu-b-40	0.00021129	146.347	62.3899
rs427943	Body mass index	low back pain	C	A	0.017	0.5669	21	46570896	0.0137	7.29962e-23	ieu-b-40	0.000141913	101.07	62.3899
rs429343	Body mass index	low back pain	G	A	-0.015	0.5813	2	147903382	0.0136	6.79986e-18	ieu-b-40	0.000109526	75.509	62.3899
rs4307239	Body mass index	low back pain	G	A	0.0115	0.4578	7	24354300	0.0136	3.90032e-11	ieu-b-40	6.5654e-05	45.1261	62.3899
rs4358081	Body mass index	low back pain	C	A	0.0097	0.4631	2	29100642	0.0136	1.5e-08	ieu-b-40	4.67888e-05	32.2874	62.3899
rs4414033	Body mass index	low back pain	A	G	0.0129	0.627	1	156406853	0.0137	1.39991e-12	ieu-b-40	7.78369e-05	52.3646	62.3899
rs4430672	Body mass index	low back pain	C	T	-0.0127	0.8004	14	63094407	0.0166	3.89996e-09	ieu-b-40	5.15353e-05	35.6333	62.3899
rs4482463	Body mass index	low back pain	A	C	-0.0331	0.9213	2	205375909	0.0286	2.80027e-23	ieu-b-40	0.000158877	100.969	62.3899
rs4495304	Body mass index	low back pain	C	T	-0.0194	0.067	6	31080718	0.025	5e-09	ieu-b-40	4.70533e-05	36.4308	62.3899
rs4516268	Body mass index	low back pain	A	C	-0.0217	0.1925	17	1846831	0.0155	5.19996e-25	ieu-b-40	0.000146394	115.172	62.3899
rs4518345	Body mass index	low back pain	A	G	-0.0117	0.2842	5	27185904	0.0158	1e-09	ieu-b-40	5.56952e-05	38.3542	62.3899
rs4556997	Body mass index	low back pain	A	C	0.0197	0.1349	2	100814858	0.0197	6.90081e-17	ieu-b-40	9.05818e-05	71.8351	62.3899
rs4589691	Body mass index	low back pain	G	C	0.0141	0.1579	2	144051398	0.0193	4.70002e-09	ieu-b-40	5.28706e-05	36.3901	62.3899
rs4639527	Body mass index	low back pain	G	A	0.0172	0.3012	2	416815	0.0139	3.29989e-20	ieu-b-40	0.000124536	86.1527	62.3899
rs4653017	Body mass index	low back pain	T	C	0.0122	0.6818	1	33776728	0.0143	4.49987e-11	ieu-b-40	6.45813e-05	44.3299	62.3899
rs4660443	Body mass index	low back pain	T	C	0.0164	0.2218	1	39591779	0.0172	6.79986e-15	ieu-b-40	9.28476e-05	63.8137	62.3899
rs4722398	Body mass index	low back pain	T	C	0.0158	0.1336	7	3125220	0.0269	3.59998e-10	ieu-b-40	5.77922e-05	40.0238	62.3899
rs4740619	Body mass index	low back pain	C	T	-0.0186	0.4521	9	15634326	0.0135	2.29985e-30	ieu-b-40	0.000171392	136.193	62.3899
rs4757144	Body mass index	low back pain	A	G	0.0169	0.5878	11	13331226	0.0135	5.60015e-22	ieu-b-40	0.000138402	95.5214	62.3899
rs4783830	Body mass index	low back pain	A	G	-0.0105	0.3074	16	54255346	0.0145	2.39999e-08	ieu-b-40	4.69456e-05	31.7144	62.3899
rs4786903	Body mass index	low back pain	G	A	0.0125	0.7368	16	6697104	0.0158	3.50002e-10	ieu-b-40	6.06018e-05	41.22	62.3899
rs4800191	Body mass index	low back pain	C	G	0.0103	0.6369	18	22461398	0.0142	2.5e-09	ieu-b-40	4.90684e-05	38.5378	62.3899
rs4813619	Body mass index	low back pain	T	G	-0.0108	0.5101	20	2815715	0.0136	2.30001e-09	ieu-b-40	5.82962e-05	36.3065	62.3899
rs4818225	Body mass index	low back pain	G	A	0.0117	0.6606	21	42629895	0.0137	2.30001e-10	ieu-b-40	6.13836e-05	42.2512	62.3899
rs4820408	Body mass index	low back pain	G	T	-0.0151	0.592	22	40604945	0.0138	2.09991e-19	ieu-b-40	0.000110145	87.4851	62.3899
rs4842491	Body mass index	low back pain	T	C	0.0098	0.7138	12	89905537	0.0147	4e-08	ieu-b-40	3.92399e-05	31.2091	62.3899
rs4851029	Body mass index	low back pain	G	T	0.0121	0.5247	2	104159785	0.0135	1.69981e-12	ieu-b-40	7.30264e-05	50.3736	62.3899
rs4858193	Body mass index	low back pain	C	T	-0.0129	0.2779	3	20441050	0.0154	1.59993e-11	ieu-b-40	6.67875e-05	45.8759	62.3899
rs4864201	Body mass index	low back pain	C	T	-0.0141	0.6469	4	130731284	0.0139	1.50003e-16	ieu-b-40	9.08245e-05	72.2358	62.3899
rs4880341	Body mass index	low back pain	T	C	-0.0118	0.5606	10	133992689	0.0135	1.10002e-11	ieu-b-40	6.85973e-05	47.2675	62.3899
rs4906908	Body mass index	low back pain	G	T	0.0103	0.5253	15	27040082	0.0135	2.5e-09	ieu-b-40	5.29092e-05	36.5803	62.3899
rs491711	Body mass index	low back pain	C	A	-0.0115	0.316	11	28742220	0.016	1.09999e-09	ieu-b-40	5.71701e-05	39.1701	62.3899
rs4929923	Body mass index	low back pain	C	T	0.0181	0.6376	11	8639200	0.0141	7.19946e-27	ieu-b-40	0.000151399	120.37	62.3899
rs4936175	Body mass index	low back pain	C	T	0.0122	0.4445	11	132641959	0.0141	1.39991e-12	ieu-b-40	7.35031e-05	50.9095	62.3899
rs4937870	Body mass index	low back pain	G	A	-0.0109	0.3172	11	112826709	0.0138	8.79995e-09	ieu-b-40	5.14647e-05	35.16	62.3899
rs4952843	Body mass index	low back pain	G	A	-0.0131	0.3807	2	46957845	0.0143	6.79986e-14	ieu-b-40	8.09201e-05	56.0401	62.3899
rs4954638	Body mass index	low back pain	C	A	-0.0118	0.2492	2	137435455	0.0142	2.90001e-09	ieu-b-40	5.21034e-05	35.9516	62.3899
rs4968656	Body mass index	low back pain	G	A	0.0116	0.3216	17	61616959	0.0147	8.19993e-10	ieu-b-40	5.87148e-05	39.6437	62.3899
rs4981693	Body mass index	low back pain	A	G	0.0206	0.771	14	29680331	0.0144	6.90081e-24	ieu-b-40	0.000149849	103.279	62.3899
rs4986044	Body mass index	low back pain	T	C	-0.0164	0.4687	17	21261560	0.0135	3.29989e-23	ieu-b-40	0.000133953	105.464	62.3899
rs538579	Body mass index	low back pain	C	G	0.0137	0.3228	3	62711674	0.0153	1.29987e-13	ieu-b-40	8.20581e-05	56.4976	62.3899
rs543874	Body mass index	low back pain	G	A	0.0475	0.1952	1	177889480	0.0177	1.1995e-122	ieu-b-40	0.0007089	564.331	62.3899
rs559231	Body mass index	low back pain	T	G	0.0135	0.3956	18	39644247	0.0137	2.39994e-14	ieu-b-40	8.71522e-05	59.7177	62.3899
rs577525	Body mass index	low back pain	C	T	0.0166	0.5676	10	99769388	0.0136	9.70063e-22	ieu-b-40	0.000135262	93.4261	62.3899
rs592483	Body mass index	low back pain	T	C	-0.0147	0.5716	11	69445173	0.0137	1.99986e-18	ieu-b-40	0.000105829	82.7535	62.3899
rs6050446	Body mass index	low back pain	G	A	0.0343	0.97001	20	25195509	0.0448	4.40048e-13	ieu-b-40	6.84496e-05	52.4555	62.3899
rs6235	Body mass index	low back pain	G	C	0.0175	0.2702	5	95728898	0.0149	1.50003e-19	ieu-b-40	0.00012078	83.5544	62.3899
rs6265	Body mass index	low back pain	T	C	-0.0412	0.1951	11	27679916	0.0186	1e-86	ieu-b-40	0.000533118	424.298	62.3899
rs6443750	Body mass index	low back pain	C	T	0.0148	0.8068	3	181329682	0.0167	3.19963e-12	ieu-b-40	6.82852e-05	53.0499	62.3899
rs6448587	Body mass index	low back pain	C	A	-0.0167	0.1891	4	28561990	0.0161	2.29985e-13	ieu-b-40	8.55306e-05	59.1149	62.3899
rs645040	Body mass index	low back pain	T	G	0.0171	0.7762	3	135926622	0.0191	2.49977e-18	ieu-b-40	0.000101591	80.8318	62.3899
rs6461115	Body mass index	low back pain	G	A	-0.0144	0.2285	7	2103668	0.0147	1.20005e-13	ieu-b-40	7.31101e-05	57.8879	62.3899
rs6471941	Body mass index	low back pain	A	G	0.0156	0.1684	8	62117973	0.0144	3.10027e-13	ieu-b-40	6.8161e-05	54.1224	62.3899
rs6500208	Body mass index	low back pain	A	G	0.014	0.2006	16	49011249	0.0146	4.10015e-12	ieu-b-40	6.2861e-05	49.1559	62.3899
rs6512302	Body mass index	low back pain	C	G	0.0142	0.7511	20	62691550	0.0165	2.09991e-12	ieu-b-40	7.53927e-05	51.7271	62.3899
rs6545714	Body mass index	low back pain	A	G	-0.0191	0.6139	2	59307725	0.0137	9.09913e-31	ieu-b-40	0.000172939	137.228	62.3899
rs6556301	Body mass index	low back pain	T	G	-0.0111	0.3596	5	176527577	0.014	4.09996e-10	ieu-b-40	5.67475e-05	41.6972	62.3899
rs6561943	Body mass index	low back pain	T	C	0.0119	0.2595	13	58356761	0.0153	4.20001e-10	ieu-b-40	5.44235e-05	43.2118	62.3899
rs657452	Body mass index	low back pain	G	A	-0.0188	0.6216	1	49589847	0.0136	7.19946e-29	ieu-b-40	0.000166268	127.689	62.3899
rs6587552	Body mass index	low back pain	G	A	-0.0173	0.7591	1	151018861	0.0151	1.59993e-17	ieu-b-40	0.000109461	75.5056	62.3899
rs6591407	Body mass index	low back pain	A	C	-0.0118	0.1861	11	56914157	0.0195	1.89998e-08	ieu-b-40	4.21805e-05	33.503	62.3899
rs6593688	Body mass index	low back pain	G	A	0.0137	0.3733	1	96322205	0.0139	8.60003e-15	ieu-b-40	8.78191e-05	60.7565	62.3899
rs663129	Body mass index	low back pain	A	G	0.0545	0.2301	18	57838401	0.0175	1.59956e-178	ieu-b-40	0.00105238	831.148	62.3899
rs6673081	Body mass index	low back pain	C	T	-0.01	0.5534	1	154989595	0.0138	1.79999e-08	ieu-b-40	4.94297e-05	33.5059	62.3899
rs6692586	Body mass index	low back pain	G	A	-0.0192	0.832	1	23299906	0.0211	1.10002e-16	ieu-b-40	0.000103054	71.2093	62.3899
rs6712	Body mass index	low back pain	C	G	0.0138	0.1368	22	50637922	0.0199	4.39997e-08	ieu-b-40	4.49765e-05	30.9662	62.3899
rs6764533	Body mass index	low back pain	A	G	0.0116	0.359	3	196088464	0.0147	1.40001e-10	ieu-b-40	6.19296e-05	42.7855	62.3899
rs6772756	Body mass index	low back pain	G	A	-0.0104	0.3372	3	182312152	0.0141	4e-08	ieu-b-40	4.83467e-05	32.9599	62.3899
rs6785245	Body mass index	low back pain	C	T	0.0132	0.3969	3	82647990	0.0141	4.00037e-14	ieu-b-40	8.34158e-05	57.7492	62.3899
rs6804842	Body mass index	low back pain	G	A	0.0156	0.572	3	25106437	0.0135	3.59998e-21	ieu-b-40	0.000119157	94.047	62.3899
rs6841761	Body mass index	low back pain	T	G	-0.0131	0.5252	4	25423538	0.0139	6.4003e-16	ieu-b-40	8.5587e-05	67.917	62.3899
rs685870	Body mass index	low back pain	C	T	0.012	0.7035	11	64111928	0.0146	2.39999e-10	ieu-b-40	6.00733e-05	41.3582	62.3899
rs6985109	Body mass index	low back pain	A	G	-0.0177	0.5338	8	10761585	0.0221	1.50003e-26	ieu-b-40	0.000155929	123.826	62.3899
rs7024334	Body mass index	low back pain	G	T	-0.0138	0.7742	9	109072075	0.0165	3.10027e-12	ieu-b-40	6.65833e-05	52.1002	62.3899
rs7025938	Body mass index	low back pain	G	C	0.0166	0.3187	9	103088321	0.0138	3.69999e-19	ieu-b-40	0.000119665	82.7676	62.3899
rs7037266	Body mass index	low back pain	A	C	-0.0112	0.3739	9	6942940	0.0138	3.50002e-10	ieu-b-40	5.87307e-05	40.6206	62.3899
rs705217	Body mass index	low back pain	G	T	-0.0102	0.3652	1	34581472	0.0141	9.29994e-09	ieu-b-40	4.8239e-05	33.2193	62.3899
rs705704	Body mass index	low back pain	A	G	-0.0131	0.3304	12	56435412	0.0145	1.9002e-13	ieu-b-40	7.59326e-05	56.4674	62.3899
rs7084454	Body mass index	low back pain	A	G	0.0193	0.335	10	21821274	0.0146	4.00037e-25	ieu-b-40	0.000165963	112.635	62.3899
rs709400	Body mass index	low back pain	G	A	-0.015	0.3818	14	104149475	0.0147	4.60045e-19	ieu-b-40	0.000106213	84.4883	62.3899
rs7102454	Body mass index	low back pain	C	T	0.0158	0.3435	11	65594820	0.015	2.39994e-18	ieu-b-40	0.000112592	77.8244	62.3899
rs7117238	Body mass index	low back pain	A	G	-0.0131	0.168	11	78040259	0.017	2.5e-09	ieu-b-40	4.79739e-05	37.8473	62.3899
rs7124681	Body mass index	low back pain	A	C	0.0263	0.4133	11	47529947	0.0142	3.19963e-58	ieu-b-40	0.000335446	266.928	62.3899
rs7138803	Body mass index	low back pain	A	G	0.03	0.3772	12	50247468	0.0139	2.29985e-71	ieu-b-40	0.000422856	336.561	62.3899
rs7144011	Body mass index	low back pain	T	G	0.0282	0.2136	14	79940383	0.0158	5.19996e-47	ieu-b-40	0.000267161	212.213	62.3899
rs7148846	Body mass index	low back pain	G	T	0.0124	0.1896	14	40133821	0.0158	2.19999e-08	ieu-b-40	4.7251e-05	32.5073	62.3899
rs7172627	Body mass index	low back pain	G	A	0.0117	0.4719	15	31877690	0.0136	1.10002e-11	ieu-b-40	6.82288e-05	47.1122	62.3899
rs7181498	Body mass index	low back pain	C	T	-0.0163	0.6309	15	95271404	0.0136	1e-19	ieu-b-40	0.00012374	85.5121	62.3899
rs7196720	Body mass index	low back pain	C	T	-0.0129	0.5068	16	24534662	0.0135	7.29962e-14	ieu-b-40	8.31896e-05	57.394	62.3899
rs7206608	Body mass index	low back pain	G	C	0.0132	0.3146	16	82872628	0.0141	1.29987e-12	ieu-b-40	7.51416e-05	51.7807	62.3899
rs7222349	Body mass index	low back pain	A	G	0.0115	0.3441	17	42304644	0.0147	3.29997e-10	ieu-b-40	5.96964e-05	41.3251	62.3899
rs7239575	Body mass index	low back pain	C	T	-0.0202	0.4832	18	21120035	0.0135	7.39946e-32	ieu-b-40	0.00020379	141.115	62.3899
rs7318817	Body mass index	low back pain	T	C	-0.0155	0.6071	13	28617708	0.0138	2.70023e-18	ieu-b-40	0.000114613	79.3119	62.3899
rs7334078	Body mass index	low back pain	C	T	-0.0121	0.2882	13	99120484	0.0156	2.19999e-10	ieu-b-40	6.00693e-05	41.3525	62.3899
rs7358465	Body mass index	low back pain	T	C	0.0103	0.6781	11	89990280	0.015	2.99999e-08	ieu-b-40	4.63147e-05	31.8166	62.3899
rs7488867	Body mass index	low back pain	T	C	-0.0204	0.2639	12	103699685	0.0147	8.4004e-24	ieu-b-40	0.000161684	102.806	62.3899
rs7498665	Body mass index	low back pain	G	A	0.0271	0.4038	16	28883241	0.0137	5.60015e-60	ieu-b-40	0.000353612	279.557	62.3899
rs7519259	Body mass index	low back pain	A	G	0.0125	0.5356	1	66434743	0.0136	3.80014e-13	ieu-b-40	7.77289e-05	52.9655	62.3899
rs7535528	Body mass index	low back pain	A	G	-0.0152	0.3741	1	2444414	0.0142	1.39991e-16	ieu-b-40	0.000108196	68.4808	62.3899
rs754635	Body mass index	low back pain	G	C	0.0198	0.8873	3	42305131	0.0227	2.19989e-13	ieu-b-40	7.8407e-05	54.132	62.3899
rs7550711	Body mass index	low back pain	T	C	0.0649	0.03058	1	110082886	0.029	3.19963e-38	ieu-b-40	0.000249729	192.135	62.3899
rs7551507	Body mass index	low back pain	T	C	-0.0184	0.5633	1	74995225	0.0135	9.30037e-30	ieu-b-40	0.000166567	132.372	62.3899
rs7557796	Body mass index	low back pain	C	T	-0.016	0.6524	2	86766153	0.0138	2.29985e-19	ieu-b-40	0.000116108	80.4042	62.3899
rs756717	Body mass index	low back pain	A	G	-0.0148	0.3973	16	72996162	0.0138	5.40008e-18	ieu-b-40	0.000104899	80.9881	62.3899
rs7599312	Body mass index	low back pain	A	G	-0.0186	0.2652	2	213413231	0.0148	6.90081e-24	ieu-b-40	0.000134834	105.295	62.3899
rs7615297	Body mass index	low back pain	G	C	-0.0149	0.1465	3	156299313	0.0183	5.69994e-10	ieu-b-40	5.55193e-05	38.2942	62.3899
rs7626079	Body mass index	low back pain	T	C	0.011	0.3434	3	66427259	0.0146	1.6e-09	ieu-b-40	5.45653e-05	37.7923	62.3899
rs7637852	Body mass index	low back pain	G	A	-0.0139	0.6951	3	44041777	0.0137	1.69981e-13	ieu-b-40	8.18963e-05	56.6616	62.3899
rs7640424	Body mass index	low back pain	T	C	-0.0136	0.2969	3	107820063	0.0141	2.29985e-14	ieu-b-40	7.72209e-05	61.0564	62.3899
rs765875	Body mass index	low back pain	T	C	-0.0121	0.4808	6	143185683	0.0137	2.99985e-12	ieu-b-40	7.30971e-05	50.5108	62.3899
rs7683836	Body mass index	low back pain	A	G	-0.0114	0.5405	4	180167906	0.0135	6.29941e-11	ieu-b-40	6.45537e-05	44.349	62.3899
rs7685048	Body mass index	low back pain	T	C	-0.0101	0.4654	4	95027784	0.0139	4.09996e-09	ieu-b-40	5.07608e-05	35.1483	62.3899
rs768840	Body mass index	low back pain	A	G	0.0114	0.4183	14	73143457	0.0141	2e-10	ieu-b-40	6.32451e-05	42.8502	62.3899
rs769449	Body mass index	low back pain	A	G	-0.0254	0.1161	19	45410002	0.0185	2.29985e-20	ieu-b-40	0.000132414	75.0693	62.3899
rs7694732	Body mass index	low back pain	G	A	-0.0099	0.4378	4	115124089	0.0136	8.70001e-09	ieu-b-40	4.82466e-05	33.3217	62.3899
rs7703576	Body mass index	low back pain	C	T	0.0103	0.2885	5	144543996	0.0143	4.79999e-08	ieu-b-40	4.35537e-05	30.0889	62.3899
rs7704281	Body mass index	low back pain	A	G	0.0271	0.04531	5	50591460	0.0353	6.4998e-11	ieu-b-40	6.35368e-05	50.1072	62.3899
rs7715256	Body mass index	low back pain	T	G	-0.0166	0.5781	5	153537893	0.0138	2.19989e-24	ieu-b-40	0.000134418	106.917	62.3899
rs7724675	Body mass index	low back pain	A	G	-0.0119	0.2238	5	130440010	0.0153	9.49992e-09	ieu-b-40	4.91992e-05	34.0458	62.3899
rs7730004	Body mass index	low back pain	T	C	0.0148	0.6693	5	43191033	0.0136	9.09913e-16	ieu-b-40	9.69635e-05	66.927	62.3899
rs7730898	Body mass index	low back pain	A	G	0.0168	0.729	5	170459675	0.0144	4.49987e-20	ieu-b-40	0.000111518	88.4407	62.3899
rs774246	Body mass index	low back pain	G	A	0.0153	0.1444	7	26990816	0.0209	5.39995e-10	ieu-b-40	5.7843e-05	39.9612	62.3899
rs7761673	Body mass index	low back pain	A	T	-0.0126	0.2058	6	70357368	0.019	1.89998e-09	ieu-b-40	5.18975e-05	35.9001	62.3899
rs7780752	Body mass index	low back pain	C	T	0.0139	0.36	7	93241640	0.0153	1e-14	ieu-b-40	8.90312e-05	61.5107	62.3899
rs7788008	Body mass index	low back pain	A	G	-0.0157	0.4445	7	112972483	0.0138	1.10002e-19	ieu-b-40	0.000121726	84.0512	62.3899
rs7811342	Body mass index	low back pain	C	T	-0.0197	0.1058	7	138794618	0.0179	1.10002e-11	ieu-b-40	7.34316e-05	49.6627	62.3899
rs7819514	Body mass index	low back pain	A	G	-0.0107	0.3216	8	93204442	0.0139	5.69994e-09	ieu-b-40	4.99574e-05	34.2201	62.3899
rs7826312	Body mass index	low back pain	C	T	0.0104	0.5879	8	32400115	0.0137	4.90004e-10	ieu-b-40	5.24086e-05	41.1608	62.3899
rs7844647	Body mass index	low back pain	C	T	-0.0123	0.2681	8	34503776	0.0158	2.80027e-11	ieu-b-40	5.9373e-05	47.1272	62.3899
rs7869771	Body mass index	low back pain	C	A	-0.014	0.2647	9	94180627	0.0167	4.90004e-13	ieu-b-40	7.62965e-05	51.8424	62.3899
rs7871866	Body mass index	low back pain	C	G	0.0187	0.1531	9	131027982	0.0171	2.29985e-14	ieu-b-40	9.06819e-05	61.986	62.3899
rs7899106	Body mass index	low back pain	G	A	0.0331	0.04777	10	87410904	0.0329	1e-18	ieu-b-40	9.96743e-05	79.1181	62.3899
rs7903146	Body mass index	low back pain	T	C	-0.0181	0.2912	10	114758349	0.017	1.29987e-23	ieu-b-40	0.000135239	107.614	62.3899
rs7925214	Body mass index	low back pain	T	C	0.0147	0.5133	11	130794253	0.0136	4.40048e-17	ieu-b-40	0.000107969	73.1675	62.3899
rs7970953	Body mass index	low back pain	A	G	0.0135	0.29	12	24075508	0.0147	9.79941e-14	ieu-b-40	7.50506e-05	59.1754	62.3899
rs7983065	Body mass index	low back pain	T	C	-0.0148	0.4503	13	33380786	0.0136	8.9002e-18	ieu-b-40	0.000108438	74.9303	62.3899
rs7998796	Body mass index	low back pain	G	A	0.0105	0.3373	13	81020036	0.014	1.09999e-08	ieu-b-40	4.92881e-05	33.9823	62.3899
rs8036040	Body mass index	low back pain	A	C	0.0109	0.4932	15	36402716	0.0135	2.69998e-10	ieu-b-40	5.9394e-05	41.0476	62.3899
rs8047395	Body mass index	low back pain	A	G	0.0642	0.5061	16	53798523	0.0135	1e-200	ieu-b-40	0.00206051	1628.8	62.3899
rs806600	Body mass index	low back pain	G	A	-0.0095	0.475	5	172914939	0.0136	3.29997e-08	ieu-b-40	4.50122e-05	31.1403	62.3899
rs8071182	Body mass index	low back pain	A	G	0.0133	0.1735	17	55336155	0.0188	2.1e-09	ieu-b-40	5.07313e-05	39.1379	62.3899
rs8090983	Body mass index	low back pain	G	A	0.0118	0.3314	18	52586691	0.0142	2e-10	ieu-b-40	6.17039e-05	42.1136	62.3899
rs8097672	Body mass index	low back pain	T	A	0.02	0.1528	18	1839601	0.0179	8.4004e-16	ieu-b-40	0.000103562	71.057	62.3899
rs8097783	Body mass index	low back pain	A	G	-0.0389	0.07554	18	58051294	0.0342	7.19946e-36	ieu-b-40	0.000211346	168.142	62.3899
rs8123881	Body mass index	low back pain	G	A	0.0196	0.1299	20	15819495	0.0159	4.40048e-16	ieu-b-40	8.68401e-05	68.8716	62.3899
rs8181823	Body mass index	low back pain	C	A	0.0127	0.7614	13	65477940	0.0152	4.09996e-10	ieu-b-40	5.86031e-05	40.5172	62.3899
rs818524	Body mass index	low back pain	C	T	0.0106	0.6939	1	85201228	0.0153	3.40001e-08	ieu-b-40	4.77312e-05	31.985	62.3899
rs8192675	Body mass index	low back pain	C	T	0.0152	0.2888	3	170724883	0.0153	1.39991e-17	ieu-b-40	9.49087e-05	75.5083	62.3899
rs825688	Body mass index	low back pain	T	C	-0.0095	0.456	16	73595718	0.0136	4.70002e-08	ieu-b-40	4.47756e-05	30.7238	62.3899
rs845084	Body mass index	low back pain	A	G	0.014	0.2678	10	125220036	0.0155	1.29987e-12	ieu-b-40	7.68646e-05	52.6879	62.3899
rs852056	Body mass index	low back pain	C	T	-0.0128	0.7584	20	17102860	0.0159	1.79999e-10	ieu-b-40	6.00406e-05	41.5429	62.3899
rs865809	Body mass index	low back pain	G	A	-0.0127	0.7678	3	183997735	0.015	5.39995e-10	ieu-b-40	5.75106e-05	39.6377	62.3899
rs872281	Body mass index	low back pain	T	C	-0.0151	0.1728	14	40834177	0.0158	4.70002e-11	ieu-b-40	6.51836e-05	44.6737	62.3899
rs876605	Body mass index	low back pain	G	A	-0.0108	0.7352	5	77801359	0.0155	3.40001e-08	ieu-b-40	4.54152e-05	31.4553	62.3899
rs879620	Body mass index	low back pain	T	C	0.0231	0.6179	16	4015729	0.0137	5.30029e-38	ieu-b-40	0.00025197	173.494	62.3899
rs889398	Body mass index	low back pain	T	C	-0.0196	0.4247	16	69556715	0.0137	1.29987e-32	ieu-b-40	0.000187724	148.272	62.3899
rs895330	Body mass index	low back pain	G	C	-0.0201	0.1924	19	4060707	0.0183	5.50047e-19	ieu-b-40	0.000125552	85.9221	62.3899
rs901630	Body mass index	low back pain	T	C	-0.0146	0.3973	6	98539519	0.0143	1.9002e-18	ieu-b-40	0.000102083	81.1233	62.3899
rs902695	Body mass index	low back pain	A	G	-0.0103	0.4798	2	113955074	0.0137	2.19999e-09	ieu-b-40	5.29584e-05	35.9412	62.3899
rs9294260	Body mass index	low back pain	A	G	0.0147	0.4731	6	83433228	0.0135	1.80011e-19	ieu-b-40	0.000107732	84.4207	62.3899
rs9300422	Body mass index	low back pain	G	A	-0.0103	0.6903	13	98223320	0.0149	4e-09	ieu-b-40	4.53611e-05	36.0641	62.3899
rs930295	Body mass index	low back pain	C	A	-0.0211	0.8417	2	50233352	0.0202	1e-19	ieu-b-40	0.000118641	81.9334	62.3899
rs9304665	Body mass index	low back pain	A	T	0.0229	0.7633	19	47602577	0.015	2.90001e-29	ieu-b-40	0.000189494	130.675	62.3899
rs934224	Body mass index	low back pain	T	C	0.0107	0.7399	2	16613889	0.0148	4.70002e-08	ieu-b-40	4.40667e-05	30.5205	62.3899
rs9362662	Body mass index	low back pain	G	A	-0.0112	0.5201	6	90296588	0.0137	1.2e-10	ieu-b-40	6.26186e-05	42.8308	62.3899
rs9367368	Body mass index	low back pain	C	T	-0.0121	0.3033	6	13189275	0.0139	1e-11	ieu-b-40	6.18755e-05	48.6818	62.3899
rs9370261	Body mass index	low back pain	T	C	0.0231	0.04601	6	53939516	0.0304	3.40001e-08	ieu-b-40	4.68436e-05	32.3259	62.3899
rs9379827	Body mass index	low back pain	A	C	-0.0132	0.2409	6	26153335	0.0161	6.89922e-12	ieu-b-40	6.37256e-05	50.6695	62.3899
rs9408882	Body mass index	low back pain	A	G	-0.0093	0.4594	9	118664402	0.0135	1.29999e-08	ieu-b-40	4.29599e-05	34.1237	62.3899
rs946824	Body mass index	low back pain	C	T	-0.0206	0.859	1	243684019	0.0191	1.10002e-15	ieu-b-40	0.000102796	70.9209	62.3899
rs947612	Body mass index	low back pain	A	G	-0.0116	0.7516	6	73738661	0.0152	5.60003e-09	ieu-b-40	5.0244e-05	34.8005	62.3899
rs9478671	Body mass index	low back pain	G	A	0.012	0.2087	6	155987825	0.0177	1.7e-08	ieu-b-40	4.75616e-05	32.7272	62.3899
rs9522285	Body mass index	low back pain	A	G	0.0127	0.4143	13	112230701	0.0135	2.49977e-13	ieu-b-40	7.82758e-05	54.0677	62.3899
rs9538162	Body mass index	low back pain	C	T	-0.0156	0.4138	13	59265043	0.0138	4.79954e-19	ieu-b-40	0.000118063	81.5139	62.3899
rs9547153	Body mass index	low back pain	G	A	0.0098	0.3839	13	85903717	0.0138	8.70001e-09	ieu-b-40	4.54309e-05	35.2286	62.3899
rs9571687	Body mass index	low back pain	A	C	-0.0129	0.329	13	67472713	0.0162	2.80027e-12	ieu-b-40	7.3473e-05	50.7715	62.3899
rs9615905	Body mass index	low back pain	T	C	0.011	0.45	22	48875699	0.0136	2.69998e-10	ieu-b-40	5.9895e-05	41.3463	62.3899
rs962273	Body mass index	low back pain	C	T	0.0137	0.7057	17	46978353	0.0151	2.60016e-13	ieu-b-40	7.79617e-05	53.9999	62.3899
rs9650755	Body mass index	low back pain	G	A	0.0154	0.2664	9	96484342	0.0147	2.80027e-15	ieu-b-40	9.26969e-05	64.0762	62.3899
rs9688431	Body mass index	low back pain	C	T	-0.0231	0.06034	6	73922654	0.0397	2.39994e-11	ieu-b-40	6.05104e-05	47.767	62.3899
rs977747	Body mass index	low back pain	G	T	-0.0169	0.5949	1	47684677	0.014	1.29987e-24	ieu-b-40	0.000137661	109.255	62.3899
rs9783858	Body mass index	low back pain	T	C	0.0091	0.5191	18	42534584	0.0135	3.29997e-08	ieu-b-40	4.13446e-05	31.8727	62.3899
rs9806742	Body mass index	low back pain	A	G	0.0208	0.8826	15	73051219	0.0297	1.39991e-15	ieu-b-40	8.96579e-05	62.0943	62.3899
rs9816226	Body mass index	low back pain	T	A	0.0323	0.8199	3	185834499	0.0184	1.59993e-52	ieu-b-40	0.000308113	239.888	62.3899
rs9845966	Body mass index	low back pain	G	T	-0.0105	0.5479	3	13433158	0.0135	2.5e-10	ieu-b-40	5.46191e-05	42.5	62.3899
rs987237	Body mass index	low back pain	G	A	0.0409	0.1803	6	50803050	0.0166	9.30037e-84	ieu-b-40	0.000494456	393.588	62.3899
rs9926784	Body mass index	low back pain	C	T	-0.0258	0.1822	16	19941968	0.0179	9.8992e-35	ieu-b-40	0.000198365	156.663	62.3899
rs9927848	Body mass index	low back pain	A	C	-0.0122	0.7326	16	23833071	0.017	6.4e-10	ieu-b-40	5.83147e-05	40.0679	62.3899
rs9951619	Body mass index	low back pain	G	T	0.0156	0.7643	18	56882326	0.0144	1.39991e-15	ieu-b-40	8.76804e-05	67.7514	62.3899
rs998732	Body mass index	low back pain	G	A	-0.0171	0.1578	19	19378671	0.0224	1.99986e-14	ieu-b-40	7.77221e-05	61.7045	62.3899
rs9989141	Body mass index	low back pain	T	C	0.0162	0.6387	14	94006257	0.0139	3.59998e-21	ieu-b-40	0.000121123	91.188	62.3899
rs999889	Body mass index	low back pain	A	G	-0.0108	0.2818	10	84279949	0.0158	1.40001e-08	ieu-b-40	4.72132e-05	32.6056	62.3899
