# Supplementary material for: A causal examination of the correlation between hormonal and reproductive factors and low back pain
Source: Front Endocrinol (Lausanne). 2024 May 10;15:1326761. doi: 10.3389/fendo.2024.1326761 (PMC11116661; doi:10.3389/fendo.2024.1326761)
Supplement: Supplementary Table S8 — The SNPs selected for BMI factors in MVMR analysis. [file Table_8.xlsx]

## Sheet: Sheet1
The SNPs selected forBMI factors to perform Multivariable MR analysis
rownames.mv_dat_for_presso.exposure_beta.	ieu.b.40_beta	ukb.a.351_beta	ukb.b.12405_beta	ukb.b.17422_beta	ukb.b.3768_beta	ukb.b.6591_beta	ukb.b.8727_beta	ieu.b.40_se	ukb.a.351_se	ukb.b.12405_se	ukb.b.17422_se	ukb.b.3768_se	ukb.b.6591_se	ukb.b.8727_se	ieu.b.40_pval	ukb.a.351_pval	ukb.b.12405_pval	ukb.b.17422_pval	ukb.b.3768_pval	ukb.b.6591_pval	ukb.b.8727_pval	outcome_beta	outcome_se	outcome_pval
rs10009336	-0.014	0.00306207	-0.00191485	-0.00221219	0.011793	-0.000257915	-0.000862015	0.0022	0.00986043	0.00453911	0.00500224	0.00280458	0.00293087	0.00459246	2.19999e-10	0.756152	0.67	0.66	2.59998e-05	0.93	0.85	-0.0165	0.0182	0.3657
rs1005579	0.0047	-0.00120421	0.00143284	-0.0131121	-0.0130876	-0.000153208	-0.00170047	0.0017	0.00735664	0.00337603	0.0037141	0.00208463	0.00217761	0.00341261	0.00700003	0.869976	0.67	0.000409996	3.40001e-10	0.94	0.62	-0.0142	0.014	0.3113
rs10132280	-0.0223	0.0047317	0.00307622	-0.00178211	0.00204342	0.00361241	0.000928251	0.0018	0.00795809	0.00366779	0.00404577	0.00226618	0.00236399	0.00370836	5.60015e-35	0.55213	0.4	0.66	0.37	0.13	0.8	0.0017	0.0141	0.9067
rs10182181	0.0325	0.0165333	-0.0090477	0.00421518	-0.0119471	0.00449579	-0.00970065	0.0016	0.0072926	0.00334398	0.00368476	0.00206435	0.00215451	0.0033855	6.70039e-90	0.0233894	0.00680002	0.25	7.19996e-09	0.0369999	0.00420001	0.0189	0.0137	0.1667
rs10204104	0.0039	0.0070883	-0.0121404	0.00266011	-0.0027614	-0.0163744	-0.00592946	0.0023	0.00964186	0.00450822	0.00495372	0.00277324	0.00289388	0.0045653	0.0929994	0.462249	0.00710003	0.59	0.32	1.5e-08	0.19	-0.0002	0.0189	0.9934
rs10248136	-0.0097	0.0058935	0.00818772	-0.000368861	0.00242181	0.00635985	0.00739309	0.0017	0.00727132	0.00335366	0.00370277	0.00207193	0.00216438	0.00339316	2e-08	0.417652	0.015	0.92	0.24	0.00329997	0.0290001	-0.009	0.0135	0.5057
rs10492229	0.0142	-0.00538859	-0.0095659	0.00342172	-0.00613561	-0.00894493	-0.0070652	0.0019	0.00858165	0.00394247	0.00435406	0.00243743	0.00254527	0.00398841	7.70016e-14	0.530061	0.015	0.43	0.012	0.000439997	0.0759994	0.0177	0.0152	0.2439
rs10510419	-0.0177	-0.0107236	0.00717475	0.00736684	-0.000844586	0.00732139	0.00269441	0.0023	0.010157	0.00471571	0.00519764	0.0029094	0.00303676	0.00477265	2.19989e-14	0.291072	0.13	0.16	0.77	0.016	0.57	0.0294	0.0192	0.1257
rs10518694	0.0146	0.00112132	8.9679e-05	0.00397072	-0.00514946	0.000379782	-0.00455842	0.0025	0.010333	0.00477637	0.00525968	0.00294646	0.00307775	0.00482942	3.29997e-09	0.913585	0.99	0.450001	0.0810009	0.9	0.35	0.0231	0.0219	0.2903
rs10742752	0.0124	0.000700709	0.00125427	0.00481896	-0.0103544	0.000664366	-0.000801655	0.0017	0.00746906	0.00343673	0.0037877	0.00212059	0.00221539	0.00347648	1.10002e-13	0.925257	0.719999	0.2	1e-06	0.760001	0.82	-0.0024	0.0136	0.8616
rs10747488	-0.0123	0.0133992	0.00861246	0.00330956	-0.00736614	0.00561998	-0.000780683	0.002	0.00864157	0.00398437	0.00439966	0.00245592	0.00256143	0.00403295	1.2e-09	0.121021	0.0309999	0.450001	0.00269998	0.0280001	0.85	-0.023	0.0145	0.1129
rs10750215	0.0108	-0.00752216	-0.0046583	-0.000287477	0.00150829	-0.000730605	-0.0019047	0.0017	0.00748605	0.00345236	0.00381029	0.00213173	0.00222476	0.00349224	1.29999e-10	0.31499	0.18	0.94	0.48	0.74	0.59	-0.0157	0.0139	0.2563
rs1075901	0.0121	-0.00642473	0.00426529	-0.0128811	-0.00627096	0.00133946	0.00180594	0.0016	0.00732094	0.00336997	0.00371966	0.00208461	0.00217723	0.003408	1.20005e-13	0.380178	0.21	0.000530005	0.00259998	0.54	0.6	0.01	0.0138	0.4661
rs10768994	-0.0114	-0.00245105	0.00205083	0.00380132	0.00110718	0.000671876	0.00259484	0.0017	0.00734517	0.00338349	0.0037301	0.00208772	0.00218256	0.00342242	6.4003e-12	0.738611	0.54	0.31	0.6	0.760001	0.450001	0.0167	0.0137	0.2216
rs10795422	0.0139	-0.0165718	0.00299688	-0.00633486	0.00274827	0.000648316	-0.00387593	0.0019	0.00786695	0.00361884	0.00398858	0.00223576	0.00233231	0.00366051	9.30037e-14	0.0351682	0.41	0.11	0.22	0.780001	0.29	-0.0094	0.0151	0.5321
rs10813912	-0.0022	-0.0145876	-0.00456023	0.0248784	0.00166127	-0.00538635	0.000802166	0.0018	0.00753706	0.00344987	0.00380188	0.0021314	0.00222898	0.00348954	0.21	0.0529456	0.19	6.00067e-11	0.44	0.016	0.82	-0.0155	0.0146	0.2879
rs10854167	-0.0029	0.00214729	0.00292816	-0.0394814	0.00215554	0.00706046	0.00221966	0.0021	0.00889786	0.00410192	0.0045064	0.00253044	0.00263927	0.00414723	0.16	0.809304	0.48	1.9002e-18	0.39	0.00749998	0.59	0.0032	0.0165	0.846
rs10858334	0.0143	0.0023997	-0.00357252	-0.00704871	-0.00768047	-0.00552886	-0.00520442	0.0026	0.0104734	0.00480018	0.00530013	0.00297001	0.00309941	0.00485461	2.69998e-08	0.818774	0.46	0.18	0.00969996	0.0739997	0.28	0.0249	0.0255	0.3281
rs10914462	-0.0112	-0.00482146	-0.00797981	-0.00132764	0.000390185	-0.00888941	-0.00107679	0.0017	0.00737114	0.00338392	0.00372883	0.00208835	0.00218239	0.0034254	1.5e-10	0.513052	0.0179999	0.719999	0.85	4.60002e-05	0.75	-0.0059	0.0136	0.6654
rs10915840	-0.0118	-0.0186784	0.00231149	-0.0184073	-0.00639657	0.00374223	0.00160818	0.0019	0.00823595	0.00375607	0.00413726	0.00232026	0.00242842	0.003802	1.29999e-09	0.0233421	0.54	8.60003e-06	0.00580003	0.12	0.67	-0.0153	0.0161	0.3421
rs10920678	-0.0155	0.0043733	0.000734667	-0.00364563	0.00294364	-0.00239485	0.001802	0.0016	0.00730322	0.00336894	0.00371853	0.00208073	0.00217262	0.00341008	1.50003e-21	0.549299	0.83	0.33	0.16	0.27	0.6	0.0023	0.0135	0.8665
rs10937153	-0.0036	-0.011849	-0.00347021	0.0360705	0.00178673	-0.00154504	-0.00129654	0.002	0.00842004	0.0039022	0.00432513	0.00240996	0.00251853	0.0039482	0.0700003	0.159368	0.37	7.39946e-17	0.46	0.54	0.74	-0.0201	0.0146	0.1694
rs10938397	0.0324	-0.0135179	0.0041484	0.00253122	-0.0162865	-0.00102141	-0.00446738	0.0016	0.00737786	0.00337993	0.00373342	0.00208684	0.00217699	0.00342017	3.40017e-86	0.0669283	0.22	0.5	6.00067e-15	0.64	0.19	0.025	0.0135	0.06422
rs10942267	-0.0156	0.0032357	-0.0025742	0.00275906	0.00485417	-0.00663037	-0.000416736	0.0019	0.00777907	0.00360109	0.00395804	0.00221923	0.0023169	0.0036425	3.90032e-17	0.67745	0.47	0.49	0.0290001	0.00420001	0.91	-0.0074	0.0163	0.6509
rs10962550	0.0182	0.015986	-0.0220606	-0.00897276	-0.00379511	-0.0131217	-0.0182787	0.0022	0.00942611	0.00434495	0.00479987	0.00268025	0.00279441	0.0043943	6.20012e-16	0.0899104	3.79997e-07	0.0619998	0.16	2.69998e-06	3.2e-05	-0.0124	0.0179	0.4871
rs10971709	0.0132	-0.00411837	0.00663712	-0.00173697	0.000797082	0.00296988	-0.00111013	0.0021	0.00898935	0.0041121	0.00453322	0.00254141	0.00265547	0.00415928	6.19998e-10	0.646857	0.11	0.7	0.75	0.26	0.79	0.0036	0.0175	0.8387
rs11031006	-0.0029	0.13515	0.0240181	0.054492	0.0209309	0.0101448	0.0192647	0.0025	0.0102396	0.00480307	0.00527329	0.00296442	0.00309447	0.00485782	0.24	1.14762e-39	5.69994e-07	5.00035e-25	1.69981e-12	0.001	7.29995e-05	-0.049	0.0181	0.00688193
rs11066188	-0.012	0.00335943	-0.00476749	0.00494139	0.00131283	-0.00305656	-0.00610471	0.0017	0.00743677	0.00340074	0.00374135	0.00209977	0.00219471	0.00343995	8.10028e-13	0.651465	0.16	0.19	0.53	0.16	0.0759994	-0.0139	0.0139	0.3157
rs11084553	-0.021	-0.0137538	0.000732855	-0.00198661	-0.0119359	0.00899394	-0.0015266	0.0024	0.00999932	0.00463896	0.00509683	0.00286319	0.00299035	0.00468989	1.80011e-18	0.168995	0.87	0.7	3.09999e-05	0.00259998	0.74	0.0482	0.0201	0.0162301
rs11118308	-0.0101	-0.00101654	-0.000853968	-2.89002e-05	0.00066698	0.00197722	-0.00183881	0.0016	0.0073254	0.00335597	0.00370368	0.00207315	0.002164	0.00339701	4.79999e-10	0.889633	0.8	0.99	0.75	0.36	0.59	0.0289	0.0136	0.0333703
rs1112613	-0.0133	-0.00423785	0.00645768	0.00646367	0.00502089	0.00239592	0.00153242	0.0023	0.00936446	0.00436115	0.00481562	0.00269221	0.00280772	0.00440981	3.40001e-09	0.650879	0.14	0.18	0.0619998	0.39	0.73	-0.0357	0.017	0.03597
rs11165643	0.0206	0.00820076	0.00217499	-0.00317587	0.00329754	-0.00129469	-0.00477217	0.0017	0.00736422	0.00339014	0.00374448	0.00209468	0.0021903	0.00343164	1.39991e-35	0.265462	0.52	0.4	0.12	0.55	0.16	0.0085	0.0138	0.5364
rs11170468	-0.0123	-0.000946914	0.0107096	0.00721666	0.00886002	0.00896794	0.0106348	0.0019	0.00863397	0.00395655	0.00436143	0.00244822	0.00255102	0.00400235	1.89998e-10	0.912669	0.00680002	0.0980009	0.000299999	0.000439997	0.00790005	-0.0102	0.0173	0.555699
rs11251352	0.0109	-0.000141886	-0.00167127	-0.000366422	-0.00178826	0.000646309	0.00107476	0.0018	0.00743618	0.00342153	0.00377007	0.00211137	0.00220672	0.00346062	7.00003e-10	0.984777	0.630001	0.92	0.4	0.77	0.760001	-0.0054	0.0135	0.691899
rs1139897	-0.0055	-0.00269043	0.0160132	-0.00672198	-0.00368755	0.0175687	0.0117295	0.0022	0.00870202	0.00401172	0.00441544	0.00247848	0.00259324	0.00405671	0.0129999	0.757192	6.59994e-05	0.13	0.14	1.20005e-11	0.00379997	0.0091	0.0141	0.520701
rs11496125	0.0169	0.00122764	-0.0038123	0.0044778	-0.0042451	-0.00311871	-0.00505797	0.0017	0.00734075	0.0034046	0.00375933	0.0021028	0.00219271	0.00344473	2.99985e-22	0.867185	0.26	0.23	0.0439997	0.15	0.14	0.0249	0.0136	0.0657506
rs11505821	0.0311	0.0166111	-0.00136115	-0.00542549	-0.000752926	-0.00561032	-0.00542375	0.0035	0.0147749	0.00675678	0.00746272	0.00417284	0.00436266	0.00683545	2.70023e-19	0.260904	0.84	0.47	0.86	0.2	0.43	-0.0266	0.0282	0.346
rs11609659	-0.0154	-0.0120394	0.00814791	0.00898825	0.00102789	0.00825491	-0.000561289	0.002	0.00849935	0.00391898	0.00431161	0.0024198	0.00252956	0.00396422	2.19989e-14	0.156639	0.0379997	0.0369999	0.67	0.00109999	0.89	-0.014	0.0155	0.3642
rs11611246	0.024	0.00163663	0.00496159	-0.0228188	-0.00791798	-0.00164738	0.00108804	0.002	0.00888489	0.00408708	0.00449663	0.0025252	0.0026392	0.00413406	5.00035e-32	0.853855	0.22	3.89996e-07	0.0017	0.53	0.79	-0.0016	0.0165	0.9231
rs11615578	0.013	0.0020152	-0.00422389	-0.00104261	0.003231	-0.00391249	-0.00621629	0.002	0.00838868	0.00384461	0.00423186	0.0023757	0.00248343	0.00388897	8.10028e-11	0.810155	0.27	0.81	0.17	0.12	0.11	-0.0051	0.0162	0.755
rs11713193	0.0239	-0.0117744	-0.0334116	-0.0117869	0.01079	-0.0197011	-0.0282748	0.0017	0.00724906	0.00334375	0.0036871	0.00206362	0.0021544	0.00338351	2.39994e-44	0.104328	1.59993e-23	0.00140001	1.7e-07	6.00067e-20	6.4998e-17	0.0368	0.0138	0.00750706
rs11736228	-0.0139	-0.0105292	-0.00304235	0.006535	0.00303849	0.00364344	-0.00320177	0.002	0.00845332	0.00385666	0.00424227	0.00237879	0.00248309	0.00390116	4.10015e-12	0.212934	0.43	0.12	0.2	0.14	0.41	0.0135	0.016	0.3984
rs11738611	0.0031	0.012446	0.00749032	0.0126604	0.0145574	0.00881484	0.00694422	0.0021	0.00887938	0.00407621	0.00449338	0.00251762	0.00262585	0.0041231	0.13	0.161022	0.0659994	0.00479999	7.39997e-09	0.000790005	0.0920005	-0.034	0.0172	0.0489801
rs11738695	0.0097	0.00182547	-0.00559713	-0.00376074	6.32003e-05	-0.00548494	-0.00231928	0.0017	0.00737339	0.00339621	0.00374383	0.00209562	0.00218958	0.00343572	2e-08	0.804465	0.0990011	0.32	0.98	0.012	0.5	-0.0027	0.0137	0.8414
rs11739877	0.0117	0.012679	-0.00330719	-0.00209238	0.0028652	-5.23455e-05	-0.00288766	0.0018	0.0074665	0.00344253	0.00379463	0.00212738	0.00222357	0.00348237	6.59933e-11	0.0894953	0.34	0.58	0.18	0.98	0.41	-0.0151	0.0135	0.266
rs11781699	0.0132	0.0109593	-0.00860065	0.0149638	-0.00220975	-0.00787824	-0.0106179	0.0021	0.00942312	0.00432885	0.00477274	0.00267541	0.0027908	0.00437762	3.09999e-10	0.24483	0.0470002	0.0017	0.41	0.00479999	0.015	-0.0069	0.015	0.6468
rs11880870	-0.0189	-0.00416492	0.0102139	0.00306098	0.0123551	0.00125941	0.00834105	0.0017	0.00725273	0.00334871	0.00368791	0.002067	0.00215932	0.00338515	1e-28	0.5658	0.00230001	0.41	2.30001e-09	0.56	0.0140001	-0.0058	0.0135	0.666
rs11889536	-0.0189	0.0130273	0.0142776	0.00500514	0.00470937	0.0128614	0.00841932	0.0024	0.0101195	0.00464057	0.00512759	0.00286331	0.00299385	0.00469776	6.4003e-15	0.197983	0.0021	0.33	0.1	1.7e-05	0.0729995	-0.082	0.0309	0.007993
rs11908637	-0.012	0.00491334	-0.00347664	-0.00129464	-0.00232318	0.00246314	-0.00713709	0.0021	0.00852097	0.00394927	0.00434266	0.00244108	0.00254714	0.00399306	4.90004e-09	0.564202	0.38	0.77	0.34	0.33	0.0739997	-0.003	0.0151	0.8441
rs11945861	-0.0148	-0.00650508	-0.00264944	4.72672e-05	-0.000539892	0.00231921	0.00116407	0.002	0.00856068	0.00395646	0.00434622	0.00243684	0.00254728	0.0040043	5.00035e-13	0.447333	0.5	0.99	0.82	0.36	0.77	0.0101	0.0161	0.5307
rs11951673	-0.0123	-0.0178205	0.000567113	0.000196832	0.00722622	0.00268441	-0.000498318	0.0017	0.00741053	0.00341401	0.00376442	0.00210948	0.00220299	0.00345332	1.10002e-13	0.0161894	0.87	0.96	0.00061	0.22	0.89	0.0307	0.0147	0.0368299
rs12041258	-0.0146	-0.0213931	0.00696312	0.00353373	0.0041783	0.00249929	0.00643314	0.002	0.00868805	0.00397555	0.00438842	0.00245725	0.0025667	0.00402441	9.49948e-13	0.0138083	0.08	0.42	0.089	0.33	0.11	-0.0139	0.0158	0.3789
rs12044597	0.0143	0.0142571	0.00233403	-0.000399762	-0.00209052	-0.00371887	-0.0021178	0.0016	0.00730546	0.00334686	0.00368958	0.00206611	0.0021549	0.00338785	1.69981e-18	0.0509988	0.49	0.91	0.31	0.0840001	0.53	-0.0159	0.0135	0.2386
rs12049202	0.024	0.00397573	-0.0105412	-0.0101433	-0.00138509	-0.00960554	-0.00459592	0.0022	0.0090869	0.00418018	0.00461933	0.00258266	0.0027054	0.00423127	1e-28	0.661735	0.012	0.0280001	0.59	0.000379997	0.28	0.0113	0.015	0.4506
rs12132692	-0.0033	0.00811795	-0.00508966	0.0402635	2.47553e-05	-0.00512775	-0.00590956	0.0029	0.0123275	0.00565928	0.00626821	0.00349652	0.00365025	0.00572844	0.25	0.510208	0.37	1.29999e-10	0.99	0.16	0.3	0.0161	0.0259	0.5347
rs12150665	-0.0162	0.0174179	0.00922869	-0.00184185	0.0060107	0.00338526	0.00942385	0.0017	0.00733469	0.00339277	0.00374876	0.0020988	0.00219451	0.00343123	1.59993e-22	0.0175679	0.00649995	0.62	0.00420001	0.12	0.00599998	-0.019	0.014	0.1755
rs1218822	0.0168	0.00330833	-0.000288157	0.000951388	-0.00816496	0.00130134	-0.00104137	0.0017	0.00764854	0.00353987	0.00390458	0.00218444	0.00228298	0.0035788	1.9002e-22	0.66535	0.94	0.81	0.000189998	0.57	0.77	0.0224	0.0143	0.1179
rs12204714	-0.002	0.00599704	0.0234883	-0.000555898	-0.00336459	0.0292636	0.0114698	0.0018	0.0075019	0.00347216	0.00383258	0.00214212	0.00223744	0.00351254	0.27	0.424063	1.29987e-11	0.88	0.12	4.30031e-39	0.00109999	-0.0306	0.014	0.0289301
rs12299814	-0.0157	0.00471859	0.00627265	0.00879985	0.00631409	0.00526466	0.0056136	0.002	0.00840307	0.00388388	0.00428871	0.00240292	0.00251326	0.0039287	5.19996e-15	0.574439	0.11	0.04	0.00860003	0.0359998	0.15	0.0013	0.0142	0.9251
rs12334877	-0.0144	0.00110397	0.00860538	0.0109697	0.00335215	0.00335721	0.0121037	0.0022	0.00920706	0.00423589	0.00467026	0.00261613	0.00273658	0.00428342	7.70016e-11	0.90456	0.0420001	0.0189998	0.2	0.22	0.00470002	-0.0225	0.0159	0.1564
rs12364470	0.0178	-0.00826295	0.00182329	-0.00344502	-0.0108178	0.00230215	-0.00212372	0.0022	0.00971597	0.00451626	0.00499372	0.00278723	0.00290914	0.00456786	1.10002e-15	0.395082	0.69	0.49	0.0001	0.43	0.64	0.0136	0.0162	0.4002
rs12369179	-0.0359	-0.000116189	-0.00975805	0.0298682	0.00220297	0.00748888	-0.004085	0.0031	0.0124332	0.00581495	0.00643376	0.00359957	0.00377364	0.00588315	2.49977e-31	0.992544	0.0929994	3.40001e-06	0.54	0.0470002	0.49	-0.0205	0.0244	0.3998
rs12416812	0.0111	0.00430767	-0.00103031	-0.00134208	-0.00402308	-0.00369164	0.00194935	0.0016	0.00729312	0.00334017	0.00368269	0.00206263	0.00215364	0.00337852	6.09958e-12	0.55476	0.760001	0.719999	0.051	0.0870001	0.56	-0.0022	0.0136	0.8703
rs1241986	-0.0139	-0.00151479	-0.000191792	0.00172752	0.0010177	-0.00179385	-0.00718857	0.0024	0.0101807	0.00469428	0.00516474	0.00289731	0.00303224	0.00474655	1.09999e-08	0.88172	0.97	0.74	0.73	0.55	0.13	-0.0138	0.0177	0.4348
rs12429545	0.0316	-0.0091989	0.0034829	-0.00152462	-0.0105298	0.00559256	0.00166198	0.0025	0.0109367	0.00504714	0.00554818	0.00310647	0.0032423	0.00510236	9.60064e-38	0.400297	0.49	0.780001	0.000700003	0.0850002	0.74	0.0416	0.0196	0.0335398
rs12448257	0.0184	0.0180895	0.000457827	0.0084162	-0.0114332	3.4627e-05	-0.00195365	0.002	0.00890145	0.00409547	0.00451421	0.0025282	0.00264172	0.00414161	8.10028e-20	0.0421425	0.91	0.0619998	6.1e-06	0.99	0.64	-0.0336	0.0184	0.0675803
rs12503643	-0.003	0.0272557	0.00484997	0.0467221	-0.00130955	0.00223002	0.00332979	0.0018	0.00744219	0.00341948	0.00376808	0.00211147	0.00220651	0.00345893	0.0929994	0.000250363	0.16	2.60016e-35	0.54	0.31	0.34	-0.0167	0.0144	0.2444
rs12593036	-0.0154	0.00164817	0.00644332	0.00119169	0.00793059	0.00775893	0.010316	0.0019	0.00783606	0.00364625	0.00402655	0.00225191	0.00235539	0.00368718	3.80014e-16	0.83341	0.0769999	0.77	0.000430002	0.000990011	0.0051	0.0075	0.0151	0.619699
rs12607903	0.0055	-0.00565375	-0.00362687	-0.0041908	-0.0213151	-0.00582642	-0.00383082	0.0019	0.00809063	0.00373658	0.00413221	0.00231029	0.00241303	0.00377866	0.00479999	0.484681	0.33	0.31	2.80027e-20	0.016	0.31	0.0098	0.0144	0.497
rs1266874	0.014	-0.00340789	-0.00410796	-0.000299885	-0.0112753	-0.000659186	-0.00530252	0.0018	0.00761573	0.00350169	0.00386313	0.00216124	0.00226018	0.00354264	9.79941e-15	0.654532	0.24	0.94	1.79999e-07	0.77	0.13	-0.0183	0.0136	0.1764
rs12680842	-0.0133	-0.00500098	0.00697682	0.0135705	0.00102897	0.0106102	0.0102663	0.0018	0.00784464	0.00359273	0.00396192	0.00221935	0.00231964	0.00363326	4.40048e-14	0.523802	0.0519996	0.00061	0.64	4.79999e-06	0.00470002	-0.0151	0.0137	0.2692
rs12718572	-0.0117	-0.0046178	-0.00345282	-0.00034186	0.008194	-0.00100032	-0.00172501	0.0018	0.00747866	0.00341909	0.00375803	0.00211066	0.00220483	0.00345915	2.99985e-11	0.536934	0.31	0.93	0.0001	0.649999	0.62	-0.0175	0.0146	0.2294
rs12762034	0.024	0.0261822	-0.00512349	0.00251394	0.00113742	-0.00297272	-0.00298945	0.0032	0.0136365	0.00628472	0.00691728	0.00387318	0.00404373	0.00635609	7.29962e-14	0.0548656	0.41	0.719999	0.77	0.46	0.64	-0.0124	0.0229	0.589599
rs12779328	0.0105	-0.00488686	0.00198656	-0.000942954	-0.00194655	-0.00274324	0.00322228	0.0019	0.00802947	0.00371005	0.00409293	0.00228853	0.0023937	0.00375296	4.49997e-08	0.542783	0.59	0.82	0.4	0.25	0.39	0.0181	0.0162	0.2652
rs12878738	-0.0059	0.0147232	-0.00409122	0.00220654	-0.0197574	-0.00475056	-0.00402387	0.0018	0.00790983	0.00363084	0.00400587	0.0022445	0.00234346	0.00367166	0.000899995	0.0626989	0.26	0.58	1.29987e-18	0.0430002	0.27	-0.0046	0.0167	0.785001
rs12888545	0.0136	-0.00118352	-0.00840277	-0.00368791	-0.00450676	-0.00483508	-0.00534017	0.002	0.00837699	0.00385479	0.00425479	0.0023855	0.00249173	0.00389802	9.09913e-12	0.887648	0.0290001	0.39	0.0589997	0.0519996	0.17	-0.008	0.0159	0.6163
rs12888955	-0.0178	0.00146621	0.0108186	-0.000682244	0.00296159	0.0137398	0.00942661	0.0018	0.00766047	0.00352203	0.00388252	0.00217694	0.00226909	0.00356126	1.39991e-22	0.848214	0.0021	0.86	0.17	1.40001e-09	0.00809991	-0.0393	0.0139	0.00478696
rs12914489	0.0165	-0.0114649	-0.0156939	0.00338704	-0.00111382	-0.0102291	-0.00932426	0.0026	0.0118064	0.00541448	0.00597831	0.00335203	0.00350205	0.00547541	3.79997e-10	0.331518	0.00369999	0.57	0.74	0.00350002	0.089	0.0243	0.0196	0.2163
rs12922346	0.0136	0.000333739	0.00777385	0.00220542	-0.00300732	0.00213863	0.00460105	0.002	0.00826623	0.00381005	0.00419935	0.0023519	0.00245647	0.00385227	1e-11	0.967795	0.0409996	0.6	0.2	0.38	0.23	0.0016	0.0169	0.9238
rs12933482	0.0186	0.00893324	-0.0065334	-0.000208533	0.00103847	-0.00245166	-0.00548689	0.0028	0.0118104	0.00546435	0.00603118	0.003381	0.00352475	0.00552472	4.90004e-11	0.449422	0.23	0.97	0.760001	0.49	0.32	0.0034	0.0286	0.9041
rs12939549	-0.018	0.000845004	-0.000847251	0.00494565	0.0065012	0.00072805	-0.000663604	0.0016	0.00728081	0.00336812	0.00371434	0.0020805	0.00217222	0.00340626	2.70023e-28	0.907606	0.8	0.18	0.00179999	0.74	0.85	0.0176	0.0142	0.2133
rs1296328	-0.0179	0.000454136	0.00465183	0.000857786	0.00200357	0.00832887	0.000535721	0.0018	0.0073782	0.0033874	0.00372495	0.00208871	0.00218273	0.00342591	4.90004e-24	0.950921	0.17	0.82	0.34	0.000140001	0.88	0.0144	0.0135	0.287
rs13021737	0.0574	-0.0119834	-0.0149204	0.00383912	-0.0312792	-0.0171028	-0.00284575	0.0021	0.00959895	0.00442542	0.00486939	0.00273213	0.00285442	0.00447993	7.49894e-157	0.211893	0.000749998	0.43	2.39994e-30	2.1e-09	0.53	-0.0193	0.0184	0.2944
rs13107325	0.047	0.00929862	-0.0100825	-0.0125481	-0.0054675	0.0043005	-0.00292165	0.0032	0.0141122	0.00637467	0.00701712	0.00394385	0.00411103	0.00644868	1.10002e-47	0.50996	0.11	0.0739997	0.17	0.3	0.649999	0.1058	0.0582	0.0689906
rs13110266	-0.0117	-0.00506713	0.00587163	0.000117858	0.00514463	0.00198584	0.00371715	0.0017	0.00736347	0.0033943	0.00374086	0.00209612	0.00219028	0.00343402	1.9002e-12	0.491367	0.0840001	0.97	0.0140001	0.36	0.28	-0.0045	0.0137	0.741199
rs13184896	-0.0133	-0.00162861	-0.0071195	-0.0023513	0.00390202	-0.00360368	-0.0077391	0.0016	0.00734322	0.00337324	0.003714	0.00208287	0.00217472	0.00341264	3.29989e-16	0.824484	0.0350002	0.53	0.061	0.0980009	0.0230001	-0.0131	0.0136	0.3341
rs13191362	-0.0236	0.00669884	0.00678946	-0.00202597	0.00485981	0.00517166	0.00547656	0.0025	0.0109248	0.00507086	0.00559211	0.00313063	0.00327677	0.00513004	5.90065e-21	0.539764	0.18	0.719999	0.12	0.11	0.29	-0.0516	0.0283	0.0682197
rs1320903	0.0216	-0.000466893	-0.000708373	0.00427559	-0.00680458	-0.00710609	-0.00116103	0.0018	0.00779992	0.00358348	0.00394865	0.00220976	0.00231166	0.00362595	9.20026e-32	0.952269	0.84	0.28	0.0021	0.0021	0.75	0.009	0.0148	0.5428
rs1321432	0.0201	-0.00155623	-0.00237342	0.0130231	0.00157515	0.0001377	-0.00212556	0.0018	0.00748565	0.00346702	0.00383463	0.00214384	0.00224241	0.00350569	3.50026e-29	0.835313	0.49	0.000680002	0.46	0.95	0.54	-0.0143	0.0144	0.3223
rs13250058	0.0112	0.00831797	-0.00236382	0.00390125	-0.00468004	-0.00327028	-0.00608203	0.0018	0.00784883	0.00360078	0.00397764	0.00222582	0.00232472	0.0036413	2.90001e-10	0.289257	0.51	0.33	0.0350002	0.16	0.0949992	-0.0141	0.0145	0.3298
rs13263601	0.0154	0.00441462	-0.0044513	-0.0029728	-0.00277326	0.000965307	-0.00421004	0.0018	0.00762837	0.00350242	0.0038579	0.00216191	0.00225974	0.00354193	2.19989e-17	0.56279	0.2	0.44	0.2	0.67	0.23	0.0046	0.0153	0.7635
rs1327259	-0.0155	-0.00502062	0.0100091	0.00414216	0.00544287	0.000851435	0.00628818	0.0018	0.00747913	0.00343869	0.00378649	0.00212015	0.00222007	0.00347847	1.69981e-18	0.502045	0.00359998	0.27	0.01	0.7	0.0710003	0.0041	0.0136	0.7641
rs13287131	0.0123	-0.010707	-0.00761444	0.00746682	-0.00459024	-0.00650092	-0.00783771	0.002	0.00833368	0.00383387	0.0042343	0.00236746	0.00247429	0.00387819	6.80002e-10	0.198877	0.0470002	0.0779992	0.0530005	0.00860003	0.0430002	-0.0012	0.0151	0.9363
rs13329567	-0.0293	0.00565207	0.00587062	-0.000976575	0.0172321	0.00383809	0.00544835	0.002	0.0087297	0.0040055	0.00442192	0.0024767	0.0025854	0.0040507	1e-50	0.517344	0.14	0.83	3.50026e-12	0.14	0.18	-0.0247	0.0184	0.1792
rs1361108	-0.0038	-0.0222135	0.00807544	-0.0158098	-0.0208891	0.00610769	0.00968728	0.0017	0.00728954	0.00335782	0.00369737	0.00207064	0.00216373	0.00339681	0.0290001	0.002311	0.016	1.89998e-05	6.20012e-24	0.00479999	0.00430002	-0.0354	0.0135	0.00892298
rs1371108	0.0119	-0.00181976	-0.00406903	0.00216163	-0.00288803	-0.00566137	-0.00966263	0.0018	0.007848	0.00358282	0.00395762	0.00221321	0.00231397	0.00362669	8.99912e-11	0.816636	0.26	0.58	0.19	0.0140001	0.00769999	-0.0121	0.0148	0.4126
rs1391075	0.0047	-0.00856439	-0.0203183	-0.0041801	-0.00213629	-0.0153773	-0.0106692	0.0018	0.00756351	0.00348702	0.0038433	0.00215401	0.00225175	0.00352709	0.00860003	0.257505	5.60003e-09	0.28	0.32	8.49963e-12	0.0025	0.0312	0.0136	0.0217801
rs1409818	0.0201	-0.0182669	-0.0162254	0.00378063	-0.0107245	-0.00420233	-0.0146699	0.0029	0.0120066	0.00553454	0.00611398	0.00342588	0.00358743	0.00559503	2.49977e-12	0.128171	0.00340001	0.54	0.0017	0.24	0.00870001	-0.0093	0.0273	0.7322
rs1412235	0.0246	-0.0158442	-0.000242905	0.00157639	-0.00298954	-0.000320203	-0.00148964	0.0017	0.00779161	0.00357661	0.00393594	0.00220545	0.0023049	0.00361802	6.00067e-45	0.0420117	0.95	0.69	0.18	0.89	0.68	0.0061	0.0139	0.6592
rs1430387	-0.0114	0.00792435	0.00600322	0.000685852	0.00360825	0.00286668	0.00471773	0.0017	0.00738186	0.00340082	0.00375005	0.00210048	0.00219267	0.00343878	5.79963e-11	0.28306	0.0779992	0.85	0.0860003	0.19	0.17	0.0159	0.0135	0.2395
rs1431659	-0.0196	-0.00656337	-0.00417115	0.00276711	0.00547268	-0.000623804	-0.00392016	0.0019	0.0081942	0.00377795	0.00417622	0.00233195	0.00243588	0.0038207	6.00067e-24	0.423151	0.27	0.51	0.0189998	0.8	0.3	0.0032	0.0158	0.8393
rs1436344	0.0141	0.00278329	-0.00637549	-0.000903525	-0.00142677	-0.00899158	-0.00132278	0.0017	0.00736422	0.00339074	0.00374347	0.00209582	0.0021871	0.0034309	4.10015e-16	0.705472	0.0599998	0.81	0.5	3.89996e-05	0.7	0.0186	0.014	0.1857
rs1452075	0.0141	0.000622586	0.0110297	-0.00294554	-0.00203933	0.00140038	0.0076403	0.0018	0.00826006	0.00378307	0.00417634	0.00233631	0.00243905	0.00382838	1.29987e-14	0.939918	0.00359998	0.48	0.38	0.57	0.0460002	-0.0516	0.0149	0.000514505
rs1465900	-0.0125	0.00351183	0.0185138	0.00213331	0.00482089	0.00767565	0.0136057	0.002	0.00897955	0.00409982	0.00451452	0.00253044	0.00264917	0.00414661	4.79999e-10	0.695732	6.29999e-06	0.64	0.0569994	0.00379997	0.001	-0.0461	0.0166	0.00557494
rs1472169	-0.0139	-0.00486	0.000414254	-0.00276853	0.0040182	-0.00773798	0.000202842	0.0018	0.00744308	0.00342601	0.00377228	0.00211276	0.00220638	0.00346549	2.80027e-15	0.51379	0.9	0.46	0.0569994	0.000449997	0.95	-0.0225	0.0146	0.1243
rs1477199	0.0228	-0.0114561	-0.00918558	0.00179248	-0.00509424	-0.00229718	-0.00458317	0.0024	0.0105066	0.00485531	0.00537078	0.00300605	0.00314259	0.00490939	9.3994e-22	0.275558	0.0589997	0.74	0.0899995	0.46	0.35	0.0088	0.0213	0.677599
rs1492767	0.0094	-0.0078573	0.000468778	0.00184379	-0.00263956	-0.00103111	0.00216037	0.0016	0.00726028	0.00334051	0.00368132	0.00206322	0.0021513	0.00338015	1e-08	0.279159	0.89	0.62	0.2	0.630001	0.52	0.0116	0.0137	0.3975
rs1503526	0.014	0.0160789	-0.00749774	0.00231732	0.00380344	-0.000594857	-0.00604177	0.0017	0.00725956	0.00334721	0.00368795	0.00206521	0.00215685	0.0033859	5.50047e-17	0.0267775	0.025	0.53	0.0659994	0.780001	0.0739997	0.0061	0.0137	0.6557
rs1516883	0.009	-0.0099678	-0.00261032	-0.0055001	-0.0443187	-0.0172085	-0.00104097	0.0019	0.00783736	0.00360814	0.0039787	0.00222417	0.00232803	0.00364969	1.29999e-06	0.203443	0.47	0.17	2.39994e-88	1.39991e-13	0.780001	-0.0261	0.0143	0.0679
rs1522569	-0.0164	-0.00553456	-0.00467599	-0.00848263	0.000450507	0.00339609	-0.00520465	0.0022	0.00945493	0.00432744	0.00476053	0.00266795	0.00278746	0.00437659	2.90001e-13	0.558308	0.28	0.0749998	0.87	0.22	0.23	-0.0129	0.0245	0.5991
rs1528435	0.0164	0.00354882	-0.00753333	-0.000573911	-0.00423844	-0.00422763	-0.00641456	0.0017	0.00749023	0.00344989	0.00379969	0.0021277	0.00222319	0.00349269	9.09913e-23	0.63565	0.0290001	0.88	0.0460002	0.0569994	0.0659994	0.0212	0.0141	0.1306
rs1535660	-0.0147	0.00810052	0.0100348	0.00586628	0.0016803	0.00710038	-0.000250198	0.0025	0.0105314	0.00486112	0.00537479	0.00300399	0.00313761	0.00491752	5.19996e-09	0.441793	0.0389996	0.28	0.58	0.0239999	0.96	-0.0268	0.0216	0.2152
rs1555406	0.0095	-0.0198016	-0.00351801	-0.00124612	-0.0194845	-0.000855201	0.00298118	0.0025	0.0113871	0.00522092	0.00574478	0.00321801	0.00335784	0.00527919	0.00015	0.0820559	0.5	0.83	1.40001e-09	0.8	0.57	-0.0034	0.0172	0.8421
rs156201	0.0123	-0.00508364	-0.00150284	-0.00597901	0.00418816	-0.0035178	-0.00321657	0.002	0.00844573	0.00386619	0.00426632	0.00238795	0.00249916	0.00391169	5.80003e-10	0.547233	0.7	0.16	0.0790005	0.16	0.41	-0.0064	0.014	0.6479
rs1656377	0.0099	0.00614678	0.00575904	-0.00218791	-0.00192256	0.00414717	0.00762491	0.0017	0.00737609	0.00339793	0.00374918	0.00209619	0.00218691	0.00343838	1.6e-08	0.40466	0.0899995	0.56	0.36	0.0580003	0.0269998	-0.0113	0.0136	0.4071
rs16849710	-0.0116	-0.00894253	0.00803126	0.0014132	0.000551363	0.000955605	0.00376212	0.0018	0.00730278	0.0033577	0.00370341	0.00207379	0.00216931	0.00339836	6.00067e-11	0.220759	0.017	0.7	0.79	0.66	0.27	-0.0167	0.0135	0.2166
rs16851483	0.0369	-0.00514829	-0.0256779	-0.0110245	-0.0151771	0.00623295	-0.0163867	0.0035	0.0146156	0.00671225	0.0074284	0.00414589	0.00433685	0.00679207	3.19963e-26	0.724655	0.000129999	0.14	0.00025	0.15	0.016	0.0057	0.0314	0.8569
rs16903285	0.0331	0.000193929	0.0166583	0.00998269	-0.00723246	0.0112851	0.00565285	0.0026	0.0108383	0.00498682	0.00549114	0.00307883	0.00320734	0.00504459	7.59976e-38	0.985724	0.000840001	0.0690001	0.0189998	0.000430002	0.26	0.0076	0.0218	0.7294
rs16991615	-0.006	-0.00213909	0.00872582	0.243363	0.0108761	0.00552814	0.000718327	0.0034	0.0139507	0.00678682	0.00766417	0.0041827	0.00436984	0.00686261	0.0769999	0.878138	0.2	1e-200	0.00929994	0.21	0.92	0.018	0.0478	0.7074
rs17014375	0.0172	-0.0109036	0.00392654	-0.0122819	-0.00399311	-0.00790017	0.00102584	0.0025	0.0107578	0.00495449	0.00545225	0.00305364	0.00318425	0.00501535	1.10002e-11	0.310803	0.43	0.0239999	0.19	0.0129999	0.84	0.0121	0.0222	0.5854
rs17033117	0.0137	-0.0021876	0.00356117	0.000258826	-0.000649897	0.00191243	-0.00543117	0.0022	0.00951612	0.00436267	0.00481614	0.00269734	0.0028178	0.00441552	8.9e-10	0.818184	0.41	0.96	0.81	0.5	0.22	0.0296	0.0181	0.1014
rs17113297	0.0166	0.0124624	0.0026943	0.00299514	-0.00548141	0.00357184	0.00552376	0.0021	0.00882347	0.00405199	0.00447312	0.00250191	0.00261516	0.00409835	2.09991e-15	0.157839	0.51	0.5	0.0280001	0.17	0.18	-0.0258	0.0161	0.1087
rs17119937	0.0212	0.00720564	0.000980046	-0.00835916	-0.00134352	0.00323751	0.00433665	0.0036	0.014746	0.00679751	0.00745593	0.00418712	0.00437719	0.00687426	5.60003e-09	0.625094	0.89	0.26	0.75	0.46	0.53	-0.0161	0.0301	0.593401
rs17203016	0.015	0.00547212	-0.000108854	-0.00550194	-0.00370227	0.00502837	-0.00231206	0.002	0.00908817	0.00418083	0.00462228	0.00258321	0.00269803	0.0042326	2.09991e-13	0.547103	0.98	0.23	0.15	0.0619998	0.58	0.0551	0.0168	0.00106901
rs17207196	-0.0221	-0.0018657	0.0153897	0.0063182	0.0131261	0.0147792	0.00965557	0.0018	0.00734095	0.00338434	0.00373129	0.00209057	0.00218563	0.00342409	2.09991e-35	0.799382	5.39995e-06	0.0899995	3.40001e-10	1.39991e-11	0.00479999	-0.0001	0.0135	0.9916
rs17238110	-0.0353	-0.00019416	-0.00679422	-0.0137569	0.0180256	0.000434529	-0.00352036	0.005	0.0250105	0.0112553	0.0124457	0.00696387	0.00727332	0.0113808	1.99986e-12	0.993806	0.55	0.27	0.00959997	0.95	0.760001	-0.0216	0.0219	0.3251
rs17399237	-0.0129	0.00986817	0.0058075	-0.00854793	0.00531057	0.000971481	0.00272517	0.0017	0.00735851	0.00336954	0.00371309	0.00208	0.00217021	0.00341146	6.70039e-14	0.179913	0.0850002	0.021	0.0109999	0.649999	0.42	-0.0217	0.0138	0.1166
rs17405819	-0.0215	-0.0143433	0.00716887	-0.0081607	0.00625704	0.00480851	0.00579293	0.0018	0.00798146	0.00366739	0.00403087	0.00226159	0.00235944	0.0037087	4.30031e-33	0.0723336	0.051	0.0430002	0.00569994	0.0420001	0.12	-0.0039	0.0149	0.792301
rs17424296	-0.0108	0.00866268	-0.0177418	-0.0127527	-0.00179825	-0.00996162	-0.0107491	0.0018	0.00758845	0.00347117	0.00382356	0.00214581	0.00223817	0.00351099	2.39999e-09	0.253645	3.2e-07	0.000850002	0.4	8.60003e-06	0.00219999	0.0173	0.0144	0.2302
rs17425707	0.0167	0.00243227	-0.00346374	0.010603	0.00100907	-0.0102651	-0.00324359	0.0028	0.0119524	0.00545078	0.00602809	0.00337376	0.00352305	0.00551772	4.39997e-09	0.838749	0.53	0.0790005	0.760001	0.00359998	0.56	0.0292	0.027	0.2782
rs17446257	0.0153	-0.00439728	-0.00172534	0.00599507	-0.012926	0.00763345	-0.00067391	0.0026	0.0107925	0.00503285	0.00554457	0.00309875	0.00322848	0.00508757	2.90001e-09	0.683688	0.73	0.28	2.99999e-05	0.0179999	0.89	-0.0106	0.0185	0.566301
rs17513613	0.0186	0.00542482	0.00441618	-0.00244084	0.000497414	-0.000419629	0.00543515	0.0018	0.00776902	0.00357875	0.00393621	0.00220806	0.00230758	0.00361775	3.59998e-26	0.485018	0.22	0.54	0.82	0.86	0.13	0.0093	0.0142	0.5098
rs175165	-0.0103	-0.0125502	0.000520976	-0.00392048	-0.00264746	0.00626934	0.000145891	0.0018	0.00747171	0.00342848	0.00377953	0.00211919	0.00221189	0.00346579	5.19996e-09	0.0930272	0.88	0.3	0.21	0.00460002	0.97	-0.023	0.0136	0.0906901
rs17535749	0.015	0.0159455	-0.00439114	-0.00416958	-0.00271589	-0.0117685	-0.00374746	0.0027	0.0117551	0.00539627	0.00595619	0.00333299	0.00348372	0.00546154	2.5e-08	0.174958	0.42	0.48	0.42	0.000729995	0.49	0.0293	0.0243	0.2275
rs1760940	0.0005	-0.00700894	0.000494539	-0.0380724	-0.00341365	-0.00308714	-0.00591788	0.0021	0.00841521	0.00388004	0.00426482	0.0023944	0.00250189	0.00392341	0.8	0.404914	0.9	4.40048e-19	0.15	0.22	0.13	0.0107	0.0165	0.5163
rs17650301	0.0044	-0.00167953	0.00538114	-0.0401265	0.000838686	0.00360983	0.000196652	0.0019	0.00804747	0.00366895	0.00403659	0.00226784	0.00237011	0.00371024	0.0230001	0.834682	0.14	2.80027e-23	0.709999	0.13	0.96	-0.004	0.0142	0.7801
rs17710386	0.0126	0.000665071	0.00715778	0.00733912	-0.000370026	0.00515488	0.0047281	0.0018	0.00780512	0.00360625	0.00398372	0.00222906	0.00232875	0.00364617	1e-12	0.932095	0.0470002	0.0649995	0.87	0.0269998	0.19	-0.0023	0.0139	0.8701
rs17789218	0.013	-0.0116698	0.00240917	-0.00039575	-0.009312	-0.0064295	0.00471441	0.0019	0.00848388	0.00388186	0.00427191	0.00239698	0.00250557	0.00392708	7.39946e-12	0.168979	0.53	0.93	0.0001	0.01	0.23	-0.0111	0.0166	0.5032
rs17806379	-0.0258	-0.0202657	0.00250404	0.00475896	-0.00132281	0.00013324	0.00122192	0.0022	0.0094005	0.00433906	0.00477563	0.00267951	0.00280131	0.00438688	1.50003e-30	0.0311064	0.56	0.32	0.62	0.96	0.780001	-0.0122	0.0187	0.514
rs1784460	0.0132	-0.0054108	-0.006817	0.00289924	-0.00797469	-0.00612457	-0.00607611	0.0018	0.00741099	0.00341712	0.00376421	0.00210622	0.00220059	0.00345626	8.99912e-14	0.465332	0.0460002	0.44	0.00015	0.00539995	0.0790005	-0.0192	0.0149	0.1962
rs1804528	0.0109	-0.0104683	0.000698329	-0.00352614	-0.00101916	-0.000773595	0.00157474	0.002	0.00756363	0.0034826	0.00383626	0.00214906	0.00224431	0.00352298	2.99999e-08	0.16636	0.84	0.36	0.64	0.73	0.649999	-0.0008	0.0138	0.9564
rs1836303	0.0116	-0.00114521	-0.00844541	0.00105811	-0.00536974	-0.00277756	-0.00662224	0.0018	0.00742028	0.00342281	0.00377823	0.00211458	0.00221045	0.00346134	5.30029e-11	0.877346	0.0140001	0.780001	0.0109999	0.21	0.0560003	0.016	0.0145	0.2673
rs1863652	-0.0115	0.00726322	0.00397537	-0.00673251	0.00183143	0.00124129	0.00110654	0.0018	0.00766184	0.00350098	0.0038524	0.00216173	0.00225997	0.00354131	1.40001e-10	0.343151	0.26	0.0810009	0.4	0.58	0.75	0.0268	0.0148	0.0699407
rs1885728	0.0108	0.0023419	0.00109535	0.00402722	-0.00478927	0.00205873	-0.00414791	0.0019	0.00786145	0.00361146	0.00398075	0.00222875	0.00232773	0.00365365	1e-08	0.765783	0.760001	0.31	0.032	0.38	0.26	-0.0067	0.0145	0.6425
rs1891216	0.0107	-0.00306234	0.000130969	-0.000146183	0.000379632	0.00286158	0.00128352	0.0018	0.00751166	0.00346007	0.00381482	0.00213856	0.00223305	0.00350236	2.39999e-09	0.683513	0.97	0.97	0.86	0.2	0.709999	-0.0088	0.0137	0.5233
rs1896767	-0.0109	-0.00451643	-0.00266575	0.00605672	-0.00105416	0.00566851	-0.00261521	0.0017	0.00725683	0.0033604	0.00370731	0.00207494	0.00216614	0.00339793	2.39999e-10	0.533703	0.43	0.1	0.61	0.0089	0.44	0.0183	0.0135	0.1758
rs1927790	0.0148	0.00968417	-0.00648066	0.00893322	-0.00181709	-0.00307818	-0.00535389	0.0016	0.00737594	0.00340039	0.00375051	0.0021	0.00219214	0.00343788	1.80011e-19	0.189213	0.0569994	0.017	0.39	0.16	0.12	0.0158	0.0135	0.2424
rs1948080	-0.0137	0.000161736	0.00494273	-0.000357047	0.00730003	0.00262289	0.00781557	0.0018	0.00745559	0.00345424	0.00380761	0.00212868	0.00222799	0.00349433	1.10002e-14	0.982693	0.15	0.93	0.000599998	0.24	0.025	-0.0275	0.0147	0.0611702
rs1982725	0.0097	0.0195824	0.00501556	-0.0142714	0.00239493	0.00196597	0.00552339	0.0017	0.00735687	0.00337503	0.00370912	0.00208346	0.00217504	0.00341187	3.29997e-08	0.00777678	0.14	0.00012	0.25	0.37	0.11	0.0098	0.0135	0.4702
rs1993709	0.0331	0.0170625	-0.0081584	-0.00378256	-0.015376	-0.0132783	-0.00867279	0.0021	0.00912661	0.00420758	0.00462439	0.00259462	0.00271467	0.00425894	1.9002e-57	0.0615574	0.0530005	0.41	3.09999e-09	1e-06	0.0420001	0.0142	0.0195	0.4664
rs2007231	-0.0104	0.0107181	0.00820449	0.00984746	0.0066338	0.00753083	0.00590821	0.0018	0.00758584	0.00348567	0.00384503	0.00215392	0.00224904	0.00352864	5.19996e-09	0.157692	0.0189998	0.01	0.0021	0.000809991	0.0940005	0.0112	0.0147	0.4446
rs2009416	-0.0121	0.00485042	0.00672553	0.00685498	0.00917445	0.000124311	0.00425336	0.0018	0.00755122	0.00348054	0.00383877	0.00215192	0.00224728	0.0035206	1.10002e-11	0.520659	0.0530005	0.0739997	2e-05	0.96	0.23	-0.017	0.0136	0.2117
rs2048113	-0.0039	0.00938127	-0.000744455	-0.00410178	-0.0163414	0.00144474	-0.00235013	0.0019	0.00786664	0.00361012	0.0039774	0.0022257	0.00232383	0.00365211	0.0329997	0.233059	0.84	0.3	2.09991e-13	0.53	0.52	0.0087	0.0142	0.5431
rs2051189	-0.0026	-0.00259218	-0.0019437	-0.00659619	-0.0124474	-0.00332371	6.85064e-06	0.0017	0.00726496	0.0033516	0.00369336	0.00207024	0.00216063	0.00338781	0.14	0.72124	0.56	0.0739997	1.79999e-09	0.12	1	0.0079	0.0135	0.5597
rs2051559	0.0176	-0.00477579	-0.0239402	-0.0049647	-0.0138139	-0.0143546	-0.0196207	0.0026	0.0107061	0.00495143	0.00546678	0.00305261	0.00319027	0.00501002	5.00035e-12	0.655543	1.29999e-06	0.36	5.99998e-06	6.80002e-06	8.99995e-05	0.0447	0.0217	0.0397402
rs2067711	0.0019	-0.0029898	-0.000575617	-0.00391495	-0.012672	0.000393084	0.000173856	0.0019	0.00812772	0.00373503	0.00411564	0.00230361	0.00240968	0.00377803	0.32	0.712986	0.88	0.34	3.79997e-08	0.87	0.96	0.027	0.016	0.0908301
rs208015	-0.0356	0.0110086	0.00311586	-0.00511186	0.00798279	0.00824886	0.00663	0.0034	0.0146861	0.00662743	0.00732339	0.00410539	0.00427852	0.00670281	1.39991e-25	0.453504	0.64	0.49	0.0519996	0.0539995	0.32	0.005	0.0214	0.8171
rs2143253	-0.0188	-0.000214771	0.0095567	0.00111901	0.00124674	0.011166	0.00982014	0.0026	0.0110823	0.00505171	0.00554724	0.00311984	0.00326234	0.005106	1.10002e-12	0.984538	0.0589997	0.84	0.69	0.000619998	0.0539995	-0.0011	0.0225	0.9626
rs2162524	0.0155	-0.000871021	0.00449758	-0.00998977	-0.00744509	-0.00477055	-0.00208777	0.0018	0.00780053	0.0035837	0.00394107	0.00220827	0.00230744	0.00362829	4.10015e-17	0.911092	0.21	0.0109999	0.000749998	0.0389996	0.57	0.0097	0.0147	0.5098
rs2174752	-0.0004	-0.0040783	-0.0070953	-0.00592299	-0.00619881	-0.0143345	-0.00723398	0.0017	0.0073246	0.0033592	0.00371244	0.00207731	0.00216954	0.00339645	0.82	0.577672	0.0350002	0.11	0.00280001	3.90032e-11	0.0329997	0.0126	0.0136	0.3536
rs2228213	-0.0139	0.0113159	0.00116841	0.00466132	-0.00808728	0.00308576	0.0028863	0.0017	0.0076367	0.00351661	0.00386983	0.00216721	0.00226347	0.00355754	4.60045e-16	0.13841	0.74	0.23	0.000189998	0.17	0.42	0.0244	0.0142	0.0854909
rs2235564	0.0131	-0.00545774	0.00292552	0.0192373	-0.00143902	0.00183954	0.00434815	0.0018	0.0076427	0.00352241	0.00389483	0.00217621	0.00227391	0.00356556	3.69999e-13	0.475163	0.41	7.79992e-07	0.51	0.42	0.22	-0.0233	0.0142	0.1012
rs2246012	0.0158	-0.00804555	0.00220784	0.0056323	0.00586652	0.0059871	-0.00149325	0.0022	0.00979286	0.00449257	0.00495454	0.00276795	0.00289778	0.0045447	3.10027e-13	0.411326	0.62	0.26	0.0340001	0.0389996	0.74	0.0085	0.016	0.5966
rs2285178	0.0112	-0.00301235	0.00203212	-0.0124848	-0.00737525	0.000584831	0.00519989	0.0019	0.00793355	0.00365029	0.00402485	0.00225666	0.00235398	0.00368949	9.40005e-09	0.704172	0.58	0.00189998	0.00109999	0.8	0.16	0.0139	0.0144	0.3372
rs2306537	0.0133	0.00575536	-0.00245104	0.000401176	0.00180541	-0.00414621	-0.00294363	0.0019	0.00784189	0.00362278	0.00399461	0.00223766	0.00233435	0.00366443	8.69961e-13	0.463	0.5	0.92	0.42	0.0759994	0.42	-0.0296	0.0154	0.0544402
rs2307111	-0.0265	-0.00453031	0.0028461	-0.00298633	0.00261103	0.00317485	0.00499894	0.0016	0.00745771	0.00342117	0.00376692	0.00211107	0.00220586	0.00346049	1.59993e-58	0.543546	0.41	0.43	0.22	0.15	0.15	-0.0085	0.0137	0.535601
rs2317299	-0.0106	0.0119167	-0.00226567	-0.000444243	0.00116677	-0.00266993	0.00276078	0.0017	0.00733073	0.00337906	0.00372118	0.00208452	0.00217816	0.0034213	1.29999e-09	0.104048	0.5	0.9	0.58	0.22	0.42	-0.0249	0.0136	0.0668205
rs2325036	-0.0181	0.00378827	0.0105461	-0.0024896	0.00366094	0.0181258	0.00497139	0.0017	0.007494	0.00345051	0.00380561	0.00212897	0.00222612	0.00349127	3.59998e-27	0.613207	0.00219999	0.51	0.0860003	3.90032e-16	0.15	-0.0063	0.0136	0.644401
rs2361988	-0.0155	0.00434813	0.00864766	-0.00136452	0.00418805	0.00386358	-0.000715883	0.002	0.00834115	0.00383135	0.00421664	0.00236533	0.00247151	0.00387468	5.19996e-15	0.602171	0.0239999	0.75	0.0769999	0.12	0.85	-0.0013	0.0168	0.9406
rs2365389	-0.0174	0.00774957	-0.00121419	-0.00109357	0.0109811	0.00376463	-0.000605664	0.0017	0.0074201	0.00340846	0.00376762	0.00210426	0.0021977	0.00344882	1.29987e-25	0.296308	0.719999	0.77	1.79999e-07	0.0870001	0.86	0.0089	0.0136	0.5127
rs2367112	-0.0119	-0.0127946	-0.00156076	-0.00463016	0.00225105	0.003128	-0.00302027	0.0016	0.0072682	0.00334053	0.00368579	0.00206531	0.00215667	0.00337893	2.29985e-13	0.0783574	0.64	0.21	0.28	0.15	0.37	-0.0071	0.0135	0.5999
rs2425840	0.0119	0.00173436	-0.00173197	-0.000509031	-0.00214723	-0.00761691	-0.00283213	0.0018	0.00741594	0.003405	0.00374549	0.00210369	0.00219965	0.00344271	1.59993e-11	0.815088	0.61	0.89	0.31	0.000530005	0.41	-0.0052	0.0143	0.7173
rs2454055	0.0023	0.0035405	-0.000739563	-0.0153467	0.0156285	0.00578132	-0.00107898	0.0017	0.00726876	0.00334089	0.0036886	0.00206421	0.00215715	0.00337916	0.19	0.626201	0.82	3.2e-05	3.69999e-14	0.00739997	0.75	-0.0147	0.0139	0.2909
rs2479958	-0.0154	-0.00256579	0.00762987	0.00164501	0.00252684	0.00458298	0.00247461	0.0018	0.0073412	0.00338435	0.00373037	0.00208939	0.00218383	0.00342195	1.50003e-17	0.726711	0.0239999	0.66	0.23	0.0359998	0.47	-0.0078	0.0135	0.565599
rs2481665	-0.0161	-0.00385885	0.00102535	0.0015547	0.00826736	0.00766897	0.00510289	0.0016	0.00733458	0.00335765	0.00370744	0.00207429	0.00216566	0.00339845	7.19946e-23	0.598811	0.760001	0.67	6.69993e-05	0.0004	0.13	-0.0023	0.0141	0.8688
rs251723	-0.0042	-0.00594388	-0.00733599	0.0517082	0.000309451	0.00243027	-0.00561849	0.0018	0.00765428	0.00352191	0.00388425	0.00217334	0.00227209	0.0035611	0.0230001	0.437435	0.0369999	1.99986e-40	0.89	0.28	0.11	0.0202	0.0137	0.1418
rs2519673	0.002	0.00334638	0.0067108	-0.0267774	0.000503361	0.00081513	0.00463692	0.0018	0.00750855	0.00345924	0.00381997	0.00213777	0.00223373	0.00349992	0.25	0.655836	0.0519996	2.39994e-12	0.81	0.719999	0.19	0.0039	0.0137	0.776401
rs2543132	0.0146	-0.00336774	-0.0053705	0.00281574	-0.00314418	-0.00679709	-0.0034801	0.0022	0.00940032	0.00428804	0.00472228	0.00264818	0.00276914	0.00433641	5.00035e-11	0.720153	0.21	0.55	0.24	0.0140001	0.42	0.0138	0.0185	0.4568
rs2600226	-0.0116	-0.00711927	-0.000748589	0.00402985	0.0039576	-0.00334015	0.00172787	0.0019	0.00780738	0.00359037	0.00397181	0.00221992	0.00231712	0.00363282	3.69999e-10	0.361848	0.83	0.31	0.0749998	0.15	0.630001	0.0047	0.0141	0.7382
rs2605603	-0.0103	0.0019785	0.00524817	0.00196415	0.000329104	0.00776097	0.00109144	0.0016	0.00730684	0.00334601	0.00369226	0.00206815	0.0021622	0.00338421	2.5e-10	0.786568	0.12	0.59	0.87	0.000329997	0.75	-0.0481	0.0135	0.000357998
rs2608703	0.0142	0.00837975	0.00851769	-0.00140284	-0.005451	0.01114	0.00596079	0.0017	0.00732856	0.00335396	0.00369624	0.0020728	0.00216559	0.00339252	1.9002e-16	0.252866	0.0109999	0.7	0.00850002	2.69998e-07	0.0790005	-0.0014	0.0136	0.919
rs2668767	-0.0062	0.00991726	0.0045386	0.0100703	0.0247595	0.00995277	0.00299054	0.0017	0.00734153	0.00338249	0.00372932	0.00209109	0.00218337	0.00342037	0.000350002	0.176756	0.18	0.00690001	2.39994e-32	5.19996e-06	0.38	-0.0085	0.0143	0.550399
rs2693826	-0.0137	0.00361627	0.00226217	-0.000661035	0.00485286	0.0107635	0.00306146	0.0017	0.00735216	0.00337106	0.00371351	0.00208042	0.00217126	0.00341316	1.99986e-15	0.622818	0.5	0.86	0.02	7.10003e-07	0.37	-0.0191	0.0135	0.156
rs2694047	0.0188	0.000831947	-0.00248261	0.00019587	-0.00203306	-0.0124504	0.00500405	0.002	0.00840422	0.00387727	0.0042846	0.0023953	0.00250407	0.00392134	3.90032e-21	0.921146	0.52	0.96	0.4	6.59994e-07	0.2	-0.0108	0.0149	0.4695
rs2697961	0.0013	0.0196157	0.00842278	-0.00630695	-0.0237364	-0.00371337	0.00627582	0.0024	0.0100584	0.00460345	0.0050588	0.00283862	0.00296111	0.00465978	0.59	0.0511623	0.0669993	0.21	6.20012e-17	0.21	0.18	0.0208	0.0169	0.2188
rs273504	0.0153	-0.00233781	-0.00233796	-0.0056842	-0.0116099	-0.00620802	-0.00528973	0.0018	0.00732723	0.00338348	0.00373599	0.00209041	0.00218625	0.00342042	4.40048e-18	0.749684	0.49	0.13	2.80001e-08	0.00449997	0.12	0.0139	0.0135	0.3036
rs2744974	0.0249	0.000305211	-0.00759325	-0.00975746	0.00250068	-0.00615098	-0.00418331	0.0018	0.00776725	0.00356189	0.00392856	0.00219718	0.0022952	0.00360323	1.39991e-45	0.968656	0.0329997	0.0129999	0.26	0.00739997	0.25	0.0688	0.0144	1.79999e-06
rs2791653	-0.0141	-0.00223698	-0.00107823	-0.0120215	-0.00273369	0.0025038	0.001057	0.0019	0.00857274	0.0039336	0.00433545	0.00242668	0.00253339	0.00398143	1.29987e-13	0.79414	0.780001	0.00560003	0.26	0.32	0.79	0.0043	0.0162	0.79
rs2820311	0.0235	-0.00364515	-0.00940313	-0.00242955	-0.000169621	-0.00661279	-0.00256104	0.0018	0.00765653	0.00352863	0.00389152	0.00218004	0.00227708	0.00357247	4.10015e-38	0.634019	0.00769999	0.53	0.94	0.00369999	0.47	0.0066	0.0148	0.6576
rs2832283	0.0115	-0.00362584	-0.00463864	0.00108703	0.00546489	-0.000829345	-0.00235192	0.002	0.00884457	0.00408963	0.00450645	0.0025273	0.00263708	0.00413345	5.80003e-09	0.681846	0.26	0.81	0.0309999	0.75	0.57	-0.0097	0.0154	0.5287
rs2868975	-0.0143	0.0152689	0.0140446	0.000121588	-1.80787e-05	-0.000577089	0.00477693	0.0023	0.0095689	0.00437777	0.00482702	0.00270149	0.00282542	0.00442931	2.19999e-10	0.11057	0.00129999	0.98	0.99	0.84	0.28	0.0172	0.016	0.2813
rs287104	0.0115	-0.000778886	0.00257021	0.0038639	-0.000201476	-0.00152743	0.00127072	0.0017	0.00762778	0.00351525	0.00387539	0.00217089	0.00227321	0.00355335	4.40048e-11	0.918669	0.46	0.32	0.93	0.5	0.719999	0.022	0.0136	0.1066
rs2907948	-0.0141	0.0119999	0.0140216	0.00378786	0.00692817	0.00801546	0.0121482	0.0019	0.00836148	0.00387617	0.0042674	0.00239153	0.00249841	0.00392188	1.29987e-13	0.151257	0.000299999	0.37	0.00379997	0.00129999	0.002	-0.003	0.0181	0.8691
rs2931434	-0.0104	0.000322124	0.00449997	0.00114922	-0.00167503	0.00218199	0.000897595	0.0018	0.00770013	0.00354749	0.00391287	0.00219111	0.00228714	0.00358794	1.40001e-08	0.966632	0.2	0.77	0.44	0.34	0.8	0.0171	0.0147	0.2455
rs2941506	0.0027	-0.00679126	0.00681107	0.0373779	0.00267217	0.00475811	0.00762177	0.0018	0.0078273	0.00359949	0.00397463	0.00222787	0.00232548	0.00363994	0.13	0.3856	0.0580003	5.19996e-21	0.23	0.0409996	0.0359998	-0.0326	0.0146	0.0252302
rs294704	-0.0113	-0.0215985	0.00056831	-0.00429693	0.00351497	-0.000611307	-0.00083328	0.0019	0.00811117	0.0037368	0.00411186	0.00230302	0.0024057	0.00378014	4e-09	0.00775318	0.88	0.3	0.13	0.8	0.83	-0.0048	0.016	0.7625
rs298247	-0.0004	0.00524343	0.0135765	0.00758299	-0.00439254	0.016312	0.00758377	0.0022	0.00968857	0.00446158	0.00492835	0.00276064	0.00288227	0.00451677	0.84	0.588375	0.00230001	0.12	0.11	1.5e-08	0.0929994	-0.0146	0.0167	0.3839
rs3007105	0.0142	0.00191844	-0.00620267	-0.000280778	-0.00687186	-0.0150836	-0.00607967	0.0017	0.00737955	0.00339387	0.00374104	0.00209779	0.00218762	0.00343196	1.10002e-17	0.794891	0.0680002	0.94	0.00109999	5.40008e-12	0.0759994	0.0016	0.0142	0.9122
rs331966	0.0112	0.00563996	0.00805762	0.00379918	-0.00257293	0.0100416	0.00616216	0.0018	0.00751958	0.00345432	0.00381262	0.0021333	0.00223001	0.00349421	3.2e-10	0.453238	0.02	0.32	0.23	6.69993e-06	0.0779992	-0.0072	0.0141	0.6071
rs33500	-0.0167	0.00471455	0.00276852	-0.0063766	0.0139474	-0.000667392	-0.00132713	0.0022	0.00945995	0.00432489	0.00476777	0.00266917	0.00278963	0.00437578	4.30031e-14	0.618227	0.52	0.18	1.7e-07	0.81	0.760001	0.0127	0.0174	0.4653
rs339991	0.0124	0.00954207	-0.00317515	0.0038895	-0.0015246	-0.00564955	-0.00591556	0.0018	0.0073422	0.0033894	0.00372965	0.00209108	0.00218399	0.00342716	1.20005e-12	0.193741	0.35	0.3	0.47	0.00969996	0.0840001	-0.0012	0.0139	0.9335
rs349088	-0.0128	0.0105372	0.0052185	-0.00114209	0.00651102	0.00130954	-0.00153884	0.0017	0.00727451	0.00335809	0.00370459	0.00207349	0.00216553	0.00339651	1.80011e-13	0.147486	0.12	0.760001	0.0017	0.55	0.649999	-0.031	0.014	0.0263403
rs3732084	0.0107	-0.0135455	-0.00325201	0.00247044	0.00313013	0.00103127	-0.00580539	0.0018	0.00747334	0.00343934	0.0037951	0.00212327	0.00221811	0.00348188	1.09999e-09	0.0699182	0.34	0.52	0.14	0.64	0.0949992	-0.0201	0.0135	0.1372
rs3736485	-0.0134	-0.0115089	0.00475453	0.000302751	0.00207234	0.00714754	0.000765166	0.0016	0.00733605	0.00336908	0.00371816	0.00208127	0.00217435	0.0034067	2.49977e-16	0.116703	0.16	0.94	0.32	0.001	0.82	0.0065	0.0137	0.6346
rs3749897	0.0122	-0.0118115	0.00423457	-0.001314	-0.00105363	-0.00103641	0.00481355	0.0018	0.00737339	0.00339509	0.00374325	0.00209393	0.00218808	0.00343495	8.4004e-12	0.109186	0.21	0.73	0.61	0.64	0.16	0.0098	0.0135	0.4668
rs3758790	-0.0003	-0.00321234	0.0121159	0.000543215	0.00109093	0.0153546	0.0117074	0.0018	0.00759585	0.00348655	0.00384072	0.0021529	0.00225012	0.00352683	0.88	0.672366	0.00051	0.89	0.61	8.9002e-12	0.000899995	-0.0224	0.0136	0.1003
rs3772882	0.0127	0.00298782	-0.00140112	0.00743639	0.00246147	0.00405531	-0.00383909	0.0018	0.00748774	0.00345362	0.00381648	0.00213234	0.00222753	0.00349462	6.59933e-13	0.689876	0.68	0.051	0.25	0.0690001	0.27	-0.0114	0.0136	0.4028
rs3800229	0.0175	0.0145973	0.00408374	-0.000521275	-0.014772	-0.00628497	0.0023387	0.0018	0.00811387	0.00371288	0.00408489	0.00228955	0.00239451	0.00375636	1.39991e-22	0.0720211	0.27	0.9	1.09999e-10	0.00870001	0.53	-0.0042	0.014	0.7668
rs3800637	0.0115	-0.0104648	0.00390347	-0.0029009	-0.0023122	0.00398018	0.00673954	0.0018	0.00776224	0.00356341	0.00392726	0.00220277	0.00229846	0.00360551	5.1e-10	0.177613	0.27	0.46	0.29	0.0830004	0.0619998	-0.0013	0.0143	0.9293
rs3806114	-0.0113	-0.0100483	0.00389075	0.00563516	0.00197217	0.00103913	0.00663531	0.0018	0.00780817	0.00359071	0.00396186	0.00221584	0.00231577	0.00363265	3.40001e-10	0.198139	0.28	0.15	0.37	0.649999	0.0680002	-0.0146	0.0158	0.3527
rs3807645	-0.0166	-0.0154648	-0.00185868	-0.00314533	0.00262957	-0.00355057	0.000567985	0.0021	0.00876671	0.00404032	0.00444998	0.0024921	0.00260105	0.00408742	2.39994e-15	0.0777356	0.649999	0.48	0.29	0.17	0.89	-0.0041	0.0168	0.805
rs3814883	0.0232	-0.00628336	0.00238918	-0.0131444	-0.011624	-0.00669019	-0.00168514	0.0017	0.00728229	0.00335915	0.00370718	0.0020748	0.00216674	0.00339674	1.10002e-40	0.388239	0.48	0.000389996	2.1e-08	0.002	0.62	0.0053	0.0137	0.698601
rs3828783	-0.0165	-0.00731147	0.00708851	-0.00370592	0.00169012	0.00947518	0.0119979	0.0021	0.00944616	0.00432762	0.0047584	0.00267199	0.00279526	0.00437734	5.60015e-15	0.438928	0.1	0.44	0.53	0.000700003	0.0061	0.0074	0.0162	0.6469
rs38314	-0.012	-0.0115513	0.000132162	0.000276908	0.00467812	0.00281757	-0.00289245	0.0017	0.00724412	0.00334487	0.0036875	0.00206563	0.00215718	0.00338432	4.70002e-12	0.110818	0.97	0.94	0.0239999	0.19	0.39	-0.0139	0.0135	0.3033
rs3904244	0.0155	-0.0110716	-0.00890703	-0.000971792	-0.000239688	-0.00718943	-0.00515498	0.0025	0.0104709	0.0048153	0.00532278	0.00297613	0.00311277	0.0048705	4.30002e-10	0.290353	0.064	0.86	0.94	0.021	0.29	0.0063	0.0159	0.693999
rs40067	-0.0266	-0.000592694	0.00182127	-0.0010203	0.00699758	0.00298894	-0.00173152	0.0023	0.0096142	0.00446809	0.00491891	0.00275406	0.00287814	0.00451953	7.10068e-30	0.950844	0.68	0.84	0.0109999	0.3	0.7	0.0048	0.0166	0.772999
rs4012234	0.0141	-0.0126283	-0.00523691	0.00499745	-0.0053979	-0.00485373	-0.000414543	0.0018	0.00737059	0.00340524	0.00375264	0.00210329	0.00219688	0.00344273	9.8992e-16	0.0866603	0.12	0.18	0.01	0.0269998	0.9	0.0048	0.0141	0.736701
rs4072917	0.0115	0.00547171	-0.00325855	0.00199303	-0.000787181	0.00392831	-0.00735109	0.0018	0.00733959	0.00336635	0.00371099	0.00207897	0.00216941	0.00340435	6.89922e-11	0.455971	0.33	0.59	0.7	0.0700003	0.0309999	0.0184	0.0136	0.1783
rs4141153	0.0041	-0.0175094	0.00430301	0.00435676	0.0281279	0.00563914	0.00581292	0.0022	0.0091274	0.0041907	0.00463883	0.00259589	0.00271461	0.00424022	0.0599998	0.0550782	0.3	0.35	2.29985e-27	0.0379997	0.17	-0.0091	0.0156	0.5593
rs4148866	0.0098	-8.45538e-05	-0.00419878	0.00688841	-0.00107504	-0.00765543	-0.0073688	0.0018	0.00736985	0.00340207	0.003749	0.00210091	0.00219423	0.00344134	4e-08	0.990846	0.22	0.0659994	0.61	0.000490004	0.032	0.0307	0.0139	0.02678
rs4237643	-0.0223	0.00158036	0.0156793	0.00909445	0.0130163	0.0114863	0.0110749	0.0019	0.00788999	0.00361037	0.00398973	0.00223239	0.0023326	0.00365211	4.30031e-33	0.841248	1.40001e-05	0.0230001	5.49997e-09	8.50002e-07	0.00239999	-0.0121	0.0146	0.4062
rs427943	0.017	-0.00303589	-0.0104919	-0.00269513	0.00535013	-0.00912185	-0.0113688	0.0017	0.00732121	0.00338051	0.00372595	0.00208902	0.00218182	0.00341722	7.29962e-23	0.678386	0.00189998	0.47	0.01	2.90001e-05	0.000879995	0.0103	0.0137	0.4511
rs4307239	0.0115	-0.00764732	0.00268876	-0.00553742	-0.00127283	0.00104949	-0.00512221	0.0017	0.00731673	0.00336107	0.00370171	0.00207614	0.00216932	0.00340039	3.90032e-11	0.295947	0.42	0.13	0.54	0.630001	0.13	-0.0167	0.0136	0.2223
rs4408133	0.0028	0.00504236	-0.00117629	0.0316029	0.000429914	0.00419377	-0.0021634	0.0019	0.00770917	0.00354496	0.00391465	0.00219035	0.00228598	0.00358874	0.14	0.51307	0.74	6.89922e-16	0.84	0.0669993	0.55	0.009	0.014	0.5203
rs4414033	0.0129	0.00298943	-0.00183749	0.00162956	-0.00275406	-0.0054523	-0.00410579	0.0018	0.00755551	0.00347288	0.00383042	0.00214462	0.00224162	0.00351527	1.39991e-12	0.692357	0.6	0.67	0.2	0.015	0.24	0.0059	0.0137	0.666201
rs4430672	-0.0127	0.00494162	0.00288454	0.00451134	0.00159352	-0.00559791	0.00388318	0.0022	0.00909009	0.00419996	0.00462205	0.00259125	0.00270685	0.00424706	3.89996e-09	0.586703	0.49	0.33	0.54	0.0389996	0.36	-0.0086	0.0166	0.6024
rs4516268	-0.0217	-0.00469785	0.012258	0.00701612	0.00770753	0.0084158	0.0101974	0.0021	0.00914347	0.00423934	0.00467752	0.00262383	0.00273926	0.00428656	5.19996e-25	0.6074	0.00379997	0.13	0.00329997	0.0021	0.017	-0.0181	0.0155	0.2415
rs4556997	0.0197	-0.0251423	-0.00128396	0.00647219	0.00320956	-0.0134841	-0.00599747	0.0024	0.0105787	0.00488445	0.00540763	0.00301465	0.00314415	0.00494576	6.90081e-17	0.0174755	0.79	0.23	0.29	1.79999e-05	0.23	-0.0214	0.0197	0.2771
rs4639527	0.0172	0.00256501	-0.00932907	0.00267993	-0.0127722	-0.00408112	-0.00552032	0.0019	0.00790603	0.00361663	0.0039806	0.00223196	0.00233374	0.00366165	3.29989e-20	0.745609	0.00990011	0.5	1.09999e-08	0.08	0.13	0.0151	0.0139	0.2771
rs4653017	0.0122	-0.00545117	-0.00118606	-5.81691e-05	0.00359016	-0.00928163	0.00245742	0.0018	0.00780961	0.00359063	0.00396641	0.00221858	0.00231959	0.00363466	4.49987e-11	0.485178	0.74	0.99	0.11	6.29999e-05	0.5	-0.0053	0.0143	0.712
rs4660443	0.0164	-0.00948993	-0.00418571	0.00288729	-0.00454066	-0.00703943	-0.00378053	0.0021	0.00882574	0.00406993	0.00449951	0.00251187	0.00262455	0.00411922	6.79986e-15	0.282268	0.3	0.52	0.0710003	0.00729995	0.36	0.0283	0.0172	0.1
rs4664605	0.001	0.0044693	0.0035566	0.00159934	-0.0165058	-0.00282983	0.00461606	0.0019	0.00766436	0.00351671	0.00387728	0.00217205	0.00226886	0.00356038	0.59	0.559812	0.31	0.68	2.99985e-14	0.21	0.19	-0.0006	0.0157	0.9686
rs4668354	-0.0046	-0.00680019	0.00200285	0.0347835	-0.00346262	0.00464871	0.00792741	0.0018	0.00751394	0.00344539	0.00380081	0.00212846	0.00222651	0.00348848	0.00870001	0.365467	0.56	5.60015e-20	0.1	0.0369999	0.0230001	-0.0265	0.0148	0.0732892
rs4727799	0.0015	0.010337	-0.0176367	-0.00119745	-0.00606142	-0.0208488	-0.00953967	0.0018	0.00763115	0.00350712	0.00386386	0.00216752	0.00225933	0.00354838	0.41	0.175562	4.90004e-07	0.760001	0.00519996	2.80027e-20	0.00719996	0.021	0.0144	0.1459
rs4740619	-0.0186	0.00891294	0.00989873	-0.000526331	-0.00135112	0.00202091	0.00355653	0.0016	0.0072977	0.00336083	0.00370959	0.00207474	0.00216788	0.00339975	2.29985e-30	0.221968	0.0032	0.89	0.51	0.35	0.3	-0.0036	0.0135	0.7889
rs4757144	0.0169	0.0012301	-0.00546456	-0.00367067	-0.0187868	-0.000844032	-0.00199914	0.0018	0.00741017	0.00340473	0.00374939	0.00210092	0.00219466	0.00344349	5.60015e-22	0.868156	0.11	0.33	3.80014e-19	0.7	0.56	0.0102	0.0135	0.4501
rs4783830	-0.0105	-0.00411662	0.0022774	-0.00154355	-0.00246821	0.000257829	0.00344287	0.0019	0.00794278	0.00364109	0.00401293	0.00224743	0.00234772	0.00368197	2.39999e-08	0.604263	0.53	0.7	0.27	0.91	0.35	-0.0026	0.0145	0.8576
rs4800191	0.0103	-0.0156251	-0.00449326	-0.00976165	-0.00401932	-0.00554949	-0.00746736	0.0017	0.00761796	0.00350926	0.00386288	0.00216718	0.00226229	0.00354819	2.5e-09	0.040268	0.2	0.012	0.064	0.0140001	0.0350002	-0.0149	0.0142	0.2934
rs4858193	-0.0129	-0.00265298	0.00993724	0.00625318	0.0059564	0.00692251	0.00569951	0.0019	0.00814727	0.00375514	0.00412893	0.00231872	0.00241543	0.00379975	1.59993e-11	0.744708	0.00809991	0.13	0.01	0.00420001	0.13	-0.0315	0.0154	0.0405798
rs4864201	-0.0141	0.000194988	-0.00250601	0.000338608	0.00998167	-0.000469525	-0.00404717	0.0017	0.00764379	0.00350515	0.00386203	0.00216351	0.00225787	0.00354497	1.50003e-16	0.979649	0.47	0.93	4e-06	0.84	0.25	-0.0121	0.0139	0.3865
rs4873133	-0.0076	-0.0038577	-0.00798223	-0.00422175	0.00526561	-0.0180907	-0.00235164	0.0019	0.0079991	0.00367857	0.00406105	0.00227249	0.00237345	0.0037204	5.99998e-05	0.629621	0.0299999	0.3	0.02	2.49977e-14	0.53	0.029	0.0155	0.0622702
rs4877593	-0.0067	-0.00417094	-0.000397781	0.00304168	-0.0133465	0.00175866	0.000108222	0.0018	0.00775177	0.00357007	0.00394131	0.00220618	0.00230677	0.00361133	0.000290001	0.590538	0.91	0.44	1.5e-09	0.450001	0.98	0.0201	0.0137	0.1438
rs4880341	-0.0118	0.000114965	0.00454625	-0.00485553	0.00431302	0.00946429	0.00595212	0.0017	0.00735849	0.00339064	0.00374431	0.0020928	0.00218516	0.00342941	1.10002e-11	0.987535	0.18	0.19	0.0389996	1.5e-05	0.0830004	0.0027	0.0135	0.8431
rs4906908	0.0103	-0.00723386	-0.000537024	0.00230777	0.00175638	0.000322919	0.000597191	0.0017	0.00727186	0.00334529	0.00368528	0.00206721	0.00216103	0.00338275	2.5e-09	0.319854	0.87	0.53	0.4	0.88	0.86	-0.0024	0.0135	0.8606
rs4929923	0.0181	-0.00575993	-0.00766491	-0.00334346	-0.0169615	-0.000396994	-0.00497227	0.0017	0.00761772	0.00350014	0.00385259	0.00215884	0.00225353	0.00354046	7.19946e-27	0.449581	0.0290001	0.39	3.90032e-15	0.86	0.16	0.0039	0.0141	0.7802
rs4936175	0.0122	0.00793563	-0.00115875	-0.00107359	-0.00161855	-0.00415986	-0.0043705	0.0017	0.00728661	0.00336197	0.00371174	0.0020757	0.0021713	0.00340052	1.39991e-12	0.276132	0.73	0.77	0.44	0.0549997	0.2	0.0241	0.0141	0.087261
rs4968656	0.0116	0.000540155	-0.00157492	0.00870255	-0.000206921	-0.00333693	0.00353288	0.0019	0.00791307	0.0036245	0.00399559	0.00223826	0.00233868	0.00366537	8.19993e-10	0.945578	0.66	0.0290001	0.93	0.15	0.34	0.018	0.0147	0.2188
rs4981693	0.0206	0.00461917	-0.00766789	0.00532306	0.000762271	-0.00867048	-0.00665355	0.002	0.00873	0.00399658	0.00440149	0.00246963	0.00257921	0.00404131	6.90081e-24	0.59673	0.0549997	0.23	0.760001	0.000769999	0.1	-0.023	0.0144	0.1084
rs4986044	-0.0164	-0.0133904	0.0158287	0.00368568	0.00467206	0.00966703	0.00762294	0.0016	0.00729861	0.003369	0.00371054	0.0020793	0.00216995	0.00340675	3.29989e-23	0.0665672	2.59998e-06	0.32	0.025	8.40001e-06	0.025	-0.0102	0.0135	0.4501
rs538579	0.0137	0.00664345	-0.00364253	-0.0096613	-0.00239611	-0.00105143	0.000356842	0.0019	0.00782719	0.00360184	0.00397634	0.00222486	0.00232273	0.00364511	1.29987e-13	0.396018	0.31	0.015	0.28	0.649999	0.92	-0.0268	0.0153	0.08085
rs543874	0.0475	0.00217436	-0.0159205	0.00228971	-0.0287444	-0.00712925	-0.0176631	0.002	0.00899451	0.00413854	0.00455773	0.00255562	0.00266664	0.00418957	1.1995e-122	0.808981	0.00012	0.62	2.39994e-29	0.00749998	2.5e-05	0.0134	0.0177	0.4475
rs545075	-0.0007	-0.00277127	0.006889	-0.00236805	0.0280331	0.00850213	0.00352526	0.0038	0.0164182	0.00743366	0.00818424	0.00457888	0.00478422	0.00752082	0.86	0.865961	0.35	0.77	9.20005e-10	0.0759994	0.64	-0.0237	0.0268	0.3749
rs559231	0.0135	0.00319396	-0.00283303	0.00358286	-0.00414045	-0.00295733	-0.00732279	0.0018	0.00747792	0.00343589	0.00379071	0.00212621	0.00221898	0.0034744	2.39994e-14	0.669296	0.41	0.34	0.051	0.18	0.0350002	0.0187	0.0137	0.1711
rs592483	-0.0147	0.000881461	0.00858479	-0.00370442	0.00389887	0.000107156	0.00392356	0.0017	0.00739287	0.00339973	0.00374691	0.00209815	0.002192	0.00343876	1.99986e-18	0.905093	0.012	0.32	0.0629999	0.96	0.25	0.0283	0.0137	0.0396698
rs6050446	0.0343	-0.000409213	-0.0191977	-0.0236807	-0.0203191	-0.029952	-0.0157364	0.0047	0.0202853	0.0095251	0.0104656	0.00587237	0.00612841	0.00962891	4.40048e-13	0.983906	0.0439997	0.0239999	0.000539995	1e-06	0.1	0.1083	0.0448	0.01563
rs6139074	0.001	-0.00525206	-0.00297669	-0.0306464	0.0025599	0.000778317	0.000424584	0.0022	0.00915552	0.00414632	0.00456118	0.00256612	0.00268026	0.00419249	0.649999	0.566209	0.47	1.80011e-11	0.32	0.77	0.92	0.0156	0.0169	0.3568
rs6235	0.0175	-0.0113406	-0.0017421	-0.000107317	-0.00880616	-0.0103762	-0.000730784	0.0019	0.00815926	0.0037746	0.00415618	0.00232896	0.00243058	0.00381805	1.50003e-19	0.164569	0.64	0.98	0.00016	2e-05	0.85	0.0116	0.0149	0.4385
rs6265	-0.0412	-0.0112094	0.00998454	0.0089694	0.0192192	0.0147999	-0.00351558	0.0021	0.0092524	0.00427805	0.0047249	0.00264075	0.00275603	0.00432722	1e-86	0.225708	0.02	0.0580003	3.40017e-13	7.90005e-08	0.42	-0.0329	0.0186	0.0773393
rs6448587	-0.0167	-0.00192091	0.0108899	-0.00462843	0.00146008	0.00703718	0.0110978	0.0023	0.00965144	0.00443084	0.00488575	0.00273405	0.00285682	0.00448338	2.29985e-13	0.842242	0.0140001	0.34	0.59	0.0140001	0.0129999	-0.0333	0.0161	0.0392401
rs645040	0.0171	-0.0024872	-0.0059753	-0.00918519	-0.00326942	-0.00988468	-0.00890748	0.002	0.00867787	0.00399927	0.00439586	0.0024638	0.00257112	0.00404652	2.49977e-18	0.77441	0.14	0.0369999	0.18	0.00012	0.0280001	0.0471	0.0191	0.01385
rs6470643	0.0082	0.00453452	0.0063572	-0.0282893	-0.00333281	-0.00407155	0.00444804	0.002	0.00884516	0.00405222	0.0044663	0.00250563	0.00261913	0.00409839	4.90004e-05	0.608197	0.12	2.39999e-10	0.18	0.12	0.28	-0.0106	0.0184	0.5654
rs6471941	0.0156	-0.00657174	-0.0051389	0.000627704	-0.00862398	-0.00253173	-0.00161069	0.0021	0.00976038	0.00448308	0.00494387	0.00276439	0.0028894	0.00453391	3.10027e-13	0.500756	0.25	0.9	0.00179999	0.38	0.719999	0.0154	0.0144	0.2837
rs6500208	0.014	-0.0118074	-0.00875251	0.00503562	-0.00513259	-0.0116677	-0.0013322	0.002	0.00899713	0.0041438	0.00457982	0.00256383	0.00267534	0.00419006	4.10015e-12	0.189413	0.0350002	0.27	0.0449997	1.29999e-05	0.75	0.0058	0.0146	0.689
rs6500437	-0.0052	-0.0107168	-0.00479886	-0.0354601	0.000105029	-0.000966569	-0.00079349	0.0018	0.00790116	0.00360674	0.00397468	0.00222958	0.00232611	0.00364673	0.00340001	0.174996	0.18	4.60045e-19	0.96	0.68	0.83	-0.022	0.0139	0.1149
rs6545714	-0.0191	0.00461591	0.000159129	0.00272423	0.00907442	0.00545471	0.00163108	0.0017	0.0074429	0.00341326	0.00376341	0.00210986	0.00220433	0.00345574	9.09913e-31	0.535146	0.96	0.47	1.7e-05	0.0129999	0.64	0.002	0.0137	0.8836
rs6556301	-0.0111	-0.0021992	0.00023875	-0.00176706	0.000729739	-0.000944589	0.00410605	0.0018	0.00761975	0.00348372	0.00384138	0.00215325	0.00224839	0.00352387	4.09996e-10	0.772876	0.95	0.649999	0.73	0.67	0.24	0.0138	0.014	0.3247
rs6561943	0.0119	-0.00231235	-0.016607	-0.00897073	0.000999158	-0.00925848	-0.0146251	0.0019	0.00833924	0.00382871	0.00422517	0.00237054	0.00247505	0.00387119	4.20001e-10	0.781563	1.40001e-05	0.0340001	0.67	0.000179999	0.00016	0.0187	0.0153	0.2242
rs657452	-0.0188	-0.0106469	-0.00167796	-0.00309626	0.00164861	0.000686018	-0.00171941	0.0017	0.00745529	0.00343304	0.00378616	0.00211901	0.0022143	0.00347497	7.19946e-29	0.153274	0.630001	0.41	0.44	0.760001	0.62	-0.0059	0.0136	0.668199
rs6587552	-0.0173	0.00654985	0.00637192	0.00666572	0.0101038	0.0153464	0.00539614	0.002	0.00859644	0.00395931	0.00436263	0.00244349	0.00255358	0.00400784	1.59993e-17	0.44611	0.11	0.13	3.50002e-05	1.89998e-09	0.18	-0.0153	0.0151	0.312
rs6591407	-0.0118	-0.00739825	0.00826499	-0.00970208	0.00392119	0.000249338	0.00712344	0.0021	0.0092973	0.00431765	0.00475872	0.00266511	0.0027861	0.00436652	1.89998e-08	0.426188	0.0560003	0.0409996	0.14	0.93	0.1	-0.0095	0.0195	0.6278
rs663129	0.0545	0.00323817	-0.0021558	0.00472617	0.00189581	0.0125831	0.00145925	0.0019	0.00858036	0.00394131	0.00434639	0.00243882	0.00254869	0.00398583	1.59956e-178	0.705883	0.58	0.28	0.44	7.90005e-07	0.709999	0.0078	0.0175	0.6546
rs6692586	-0.0192	0.0059424	-0.00129526	0.00301531	-0.00610391	0.00308657	-0.00100156	0.0023	0.00988487	0.00450606	0.00497065	0.00277963	0.00289155	0.00456135	1.10002e-16	0.547737	0.77	0.54	0.0280001	0.29	0.83	0.0065	0.0211	0.7579
rs6712	0.0138	-0.004285	0.00553247	-0.0120753	-0.00445917	0.00142012	0.00554849	0.0025	0.010737	0.00493714	0.00543856	0.00305145	0.00319047	0.00499201	4.39997e-08	0.689831	0.26	0.0259998	0.14	0.66	0.27	-0.0212	0.0199	0.2863
rs6764533	0.0116	0.010643	-0.00365454	-0.00552973	-0.00148318	-0.000576475	-0.00357188	0.0018	0.00756948	0.00347983	0.00384707	0.00215058	0.00224691	0.00352128	1.40001e-10	0.159724	0.29	0.15	0.49	0.8	0.31	0.0105	0.0147	0.4765
rs6785245	0.0132	0.00437499	0.000180039	-0.000453174	-0.00273354	-0.00423185	0.00281933	0.0017	0.00741142	0.0034097	0.00376354	0.00210352	0.00219832	0.00345006	4.00037e-14	0.554991	0.96	0.9	0.19	0.0539995	0.41	-0.0069	0.0141	0.6248
rs6804842	0.0156	0.000124858	0.00207794	0.00720768	-0.00351871	-0.00552935	0.00349324	0.0017	0.00739311	0.00338906	0.00372937	0.00208986	0.00218483	0.00342971	3.59998e-21	0.986526	0.54	0.0530005	0.0920005	0.0109999	0.31	0.0103	0.0135	0.4488
rs6830848	-0.0041	-0.00439529	0.00374724	-0.0347717	0.000220966	-0.00384988	0.00237678	0.0017	0.00727391	0.00334204	0.00368223	0.00206308	0.00215638	0.00338148	0.017	0.54568	0.26	3.59998e-21	0.91	0.0739997	0.48	-0.0154	0.0135	0.2519
rs6841761	-0.0131	-0.00446991	0.00478846	-0.0116058	0.00519021	0.00223993	-0.00144376	0.0016	0.00729013	0.00335636	0.00370482	0.00207199	0.00216335	0.00339676	6.4003e-16	0.539785	0.15	0.0017	0.012	0.3	0.67	0.0032	0.0139	0.8168
rs685870	0.012	0.0050503	0.00376419	-0.004687	0.00609584	0.00636304	0.0021008	0.0019	0.00791384	0.00365956	0.00403474	0.00225662	0.0023602	0.00370145	2.39999e-10	0.523374	0.3	0.25	0.00690001	0.00700003	0.57	-0.0011	0.0146	0.9408
rs6961014	-0.0004	0.00160173	0.00585063	-0.029044	-0.00479525	0.00020237	-8.74298e-05	0.0021	0.00889066	0.00408464	0.00451308	0.00252023	0.00263367	0.00413223	0.86	0.857029	0.15	1.2e-10	0.0569994	0.94	0.98	-0.0083	0.0159	0.6009
rs697049	0.0003	0.007526	0.000660356	-0.000492476	-0.0153941	-0.00140259	-0.00213809	0.0018	0.00766843	0.00353176	0.00390003	0.00218158	0.00228205	0.00357255	0.86	0.32639	0.85	0.9	1.69981e-12	0.54	0.55	-0.0195	0.0159	0.2197
rs6985109	-0.0177	0.00116907	0.0125088	0.0115905	0.00411578	0.0154379	0.0117127	0.0017	0.00730368	0.0033579	0.00370306	0.00207263	0.00216452	0.00339625	1.50003e-26	0.87283	0.0002	0.0017	0.0470002	9.8992e-13	0.000560003	-0.0244	0.0221	0.269
rs7025938	0.0166	0.000674012	-0.0060969	0.0028269	-0.00387822	-0.000982308	0.00247387	0.0019	0.00784843	0.00358566	0.00395644	0.00221369	0.00231725	0.00362715	3.69999e-19	0.931564	0.089	0.47	0.08	0.67	0.5	0.0024	0.0138	0.8601
rs705217	-0.0102	0.00615382	0.00299101	-0.00214424	-0.00217464	0.00212487	-0.00420847	0.0018	0.00756238	0.00347159	0.00382732	0.00214253	0.00223849	0.00351413	9.29994e-09	0.415799	0.39	0.58	0.31	0.34	0.23	-0.0016	0.0141	0.9109
rs705704	-0.0131	0.0124137	0.0206805	0.00835262	0.00740307	0.0151261	0.0112211	0.0018	0.00762712	0.00352478	0.00387799	0.002177	0.00227429	0.00356553	1.9002e-13	0.103625	4.39997e-09	0.0309999	0.000669993	2.90001e-11	0.0016	-0.0159	0.0145	0.2719
rs7084454	0.0193	0.00961099	-0.00984096	0.0035178	0.000682564	-0.00464686	-0.00876412	0.0019	0.00777236	0.00357361	0.00395245	0.00220782	0.00230877	0.00361478	4.00037e-25	0.21626	0.00589997	0.37	0.760001	0.0439997	0.015	0.0525	0.0146	0.000331101
rs7085104	0.0125	-0.0120587	-0.000859805	0.00502724	0.00891085	-0.0146038	-0.00141318	0.0017	0.00775568	0.00356124	0.00392344	0.00219797	0.00229572	0.00360254	2.29985e-13	0.119998	0.81	0.2	5e-05	2e-10	0.69	-0.022	0.0144	0.127
rs7102454	0.0158	0.00465591	-0.00378171	-0.00237898	-0.00618272	-0.00397596	-0.00928699	0.0018	0.00757057	0.0034838	0.00383633	0.00214956	0.0022477	0.0035237	2.39994e-18	0.538559	0.28	0.54	0.004	0.0769999	0.00840001	0.0076	0.015	0.612099
rs7117238	-0.0131	-0.00405158	0.00112711	0.0217623	0.0150254	-0.000284577	0.0112169	0.0022	0.0099708	0.00454691	0.00500085	0.00280273	0.00293151	0.00459887	2.5e-09	0.684491	0.8	1.40001e-05	8.30004e-08	0.92	0.015	-0.0052	0.017	0.760801
rs7124681	0.0263	0.0214335	-0.00079731	-0.00239629	-0.0160423	0.00266404	-0.00709106	0.0016	0.00736015	0.00339402	0.0037457	0.00209548	0.00218882	0.00343329	3.19963e-58	0.00359269	0.81	0.52	1.9002e-14	0.22	0.0389996	-0.0076	0.0142	0.589299
rs7125555	0.0017	-0.0119746	-0.00205397	-0.0276469	0.00500415	0.00498126	-0.00136169	0.0017	0.00730337	0.00335052	0.00368739	0.00206711	0.00215965	0.00338897	0.34	0.101099	0.54	6.4998e-14	0.015	0.021	0.69	0.0022	0.0138	0.8748
rs7138803	0.03	-0.0079048	0.00515256	0.0018003	-0.0125748	0.0036201	0.00304313	0.0017	0.00751024	0.0034643	0.00382094	0.00214	0.00223424	0.00350412	2.29985e-71	0.292562	0.14	0.64	4.20001e-09	0.11	0.39	0.0013	0.0139	0.9274
rs714393	-0.0039	-0.00185906	0.015749	0.00534721	-0.00116124	0.0141564	0.0118678	0.0017	0.00731371	0.00335476	0.00369949	0.00207165	0.00216389	0.00339684	0.0230001	0.799352	2.69998e-06	0.15	0.58	6.09958e-11	0.000479999	-0.0208	0.0136	0.1265
rs7144011	0.0282	-0.0089537	0.000256479	0.000338235	-0.000600857	0.0020682	-0.000344253	0.002	0.00870962	0.00403717	0.00443374	0.00248841	0.00260409	0.0040822	5.19996e-47	0.303947	0.95	0.94	0.81	0.43	0.93	0.0083	0.0158	0.6018
rs7148846	0.0124	0.00163156	-0.00846662	-0.00850096	-0.00311336	-0.0053506	-0.00449082	0.0022	0.00928982	0.00426888	0.00470329	0.00263368	0.00274888	0.00431656	2.19999e-08	0.860587	0.0470002	0.0710003	0.24	0.0519996	0.3	0.038	0.0158	0.01622
rs7172627	0.0117	0.0114772	-0.00586745	0.000556384	-0.00556206	0.000492202	-0.00207089	0.0017	0.00733571	0.00335953	0.00370713	0.00207778	0.00216769	0.00339747	1.10002e-11	0.117696	0.0810009	0.88	0.00739997	0.82	0.54	0.0118	0.0136	0.3849
rs7181498	-0.0163	-0.00805648	0.00706556	0.000712284	0.00255679	0.0100832	0.00351344	0.0018	0.00760423	0.00350186	0.00385111	0.00216114	0.00225979	0.00354103	1e-19	0.289393	0.0439997	0.85	0.24	8.09991e-06	0.32	0.0109	0.0136	0.4198
rs7196720	-0.0129	0.0107583	0.00941377	-0.00035472	0.00534121	0.00817926	0.00883466	0.0017	0.00726481	0.00334709	0.00369352	0.00206722	0.00215957	0.00338462	7.29962e-14	0.138649	0.00490004	0.92	0.00980009	0.00015	0.00899995	0.0064	0.0135	0.6376
rs7236339	0.0063	0.00141972	-0.0212124	0.00220498	0.00414436	-0.0204944	-0.0123032	0.0021	0.00872057	0.00401638	0.00443446	0.00248342	0.00259028	0.00406123	0.00259998	0.870676	1.29999e-07	0.62	0.0949992	2.49977e-15	0.0025	0.0264	0.0157	0.0923698
rs7239575	-0.0202	0.0105251	0.00981235	0.00564955	0.00339918	0.00938847	0.0141186	0.0017	0.00725375	0.00334171	0.00368341	0.00206506	0.00215948	0.00337917	7.39946e-32	0.146792	0.00329997	0.13	0.1	1.40001e-05	2.90001e-05	-0.0177	0.0135	0.1889
rs7318817	-0.0155	-0.000841911	-0.00723459	-0.00152447	0.0110866	-0.00231746	-0.00719484	0.0018	0.0075123	0.00345718	0.00381387	0.00213592	0.00222909	0.00349578	2.70023e-18	0.910768	0.0359998	0.69	2.1e-07	0.3	0.04	-0.0197	0.0138	0.1549
rs7488867	-0.0204	-0.00572788	0.00206064	0.00764584	0.00315485	0.00206192	0.00372854	0.002	0.00834722	0.00384385	0.00424508	0.00237334	0.00247711	0.00388824	8.4004e-24	0.49259	0.59	0.0719996	0.18	0.41	0.34	0.0066	0.0147	0.6509
rs7498665	0.0271	0.0157145	-0.000842047	-0.00381814	-0.00783698	-0.000225742	0.000870442	0.0017	0.0074403	0.00342112	0.00376387	0.00211125	0.002205	0.00345959	5.60015e-60	0.0346873	0.81	0.31	0.00021	0.92	0.8	-0.0068	0.0137	0.6181
rs7535528	-0.0152	-0.00242403	0.0049708	-0.00607043	-0.000284321	-0.0012417	-0.00124524	0.0018	0.00754063	0.00347248	0.00382871	0.00214338	0.0022405	0.00351482	1.39991e-16	0.747861	0.15	0.11	0.89	0.58	0.719999	0.0028	0.0142	0.8418
rs754635	0.0198	-0.024333	0.00407839	-0.00131416	-0.00672794	-0.00211921	0.00179705	0.0027	0.0113724	0.00526071	0.00580648	0.00325048	0.00339614	0.00532333	2.19989e-13	0.0323907	0.44	0.82	0.0379997	0.53	0.74	0.0007	0.0227	0.9767
rs7550711	0.0649	0.00431184	-0.0125613	0.00395285	-0.0178908	0.00466276	-0.013883	0.005	0.0232822	0.0104926	0.0116151	0.00648522	0.00679293	0.0106197	3.19963e-38	0.853074	0.23	0.73	0.00580003	0.49	0.19	-0.0312	0.029	0.2808
rs7553348	-0.0183	-0.0103209	0.0112814	-0.00311011	0.0260579	0.0146823	0.00674177	0.0016	0.00733811	0.0033669	0.00372322	0.00208128	0.00217232	0.00340849	2.99985e-29	0.159593	0.000809991	0.4	5.79963e-36	1.39991e-11	0.0479999	-0.0164	0.0135	0.2227
rs7557796	-0.016	0.011068	0.0055302	0.00444098	0.00548856	-0.00578999	0.00555957	0.0018	0.00760952	0.00349521	0.00384894	0.002157	0.00225356	0.00353869	2.29985e-19	0.145822	0.11	0.25	0.0109999	0.01	0.12	0.0025	0.0138	0.8567
rs7563777	0.006	-0.00137266	-0.00502315	0.00436156	-0.0134158	0.00114903	-0.00533321	0.0017	0.00732446	0.00333706	0.00367682	0.00206241	0.00215495	0.0033785	0.000439997	0.851342	0.13	0.24	7.8001e-11	0.59	0.11	0.003	0.0136	0.8277
rs756717	-0.0148	-0.0167708	-0.00121785	-0.00497209	0.00177152	0.00045041	-0.000536657	0.0017	0.00753384	0.00346265	0.00381175	0.00213752	0.00223051	0.00350143	5.40008e-18	0.0260178	0.73	0.19	0.41	0.84	0.88	0.0097	0.0138	0.4829
rs7599312	-0.0186	0.00486865	0.00267721	0.00652081	0.0103544	0.000675109	0.00401078	0.0019	0.0082523	0.00380456	0.00419663	0.00234848	0.00245269	0.00385146	6.90081e-24	0.555212	0.48	0.12	1e-05	0.780001	0.3	0.0257	0.0148	0.0827104
rs7626079	0.011	-0.00110786	0.00340342	-0.00161965	-0.00213405	-0.00207066	0.00839458	0.0018	0.00766285	0.00353212	0.00389041	0.00217977	0.00227525	0.00357394	1.6e-09	0.885047	0.34	0.68	0.33	0.36	0.0189998	0.0262	0.0146	0.0732605
rs7637852	-0.0139	-0.0208942	0.00386064	0.000204612	-0.0060063	-0.00227641	0.00354132	0.0019	0.00794859	0.00366007	0.00403606	0.00225937	0.00236107	0.00370335	1.69981e-13	0.0085763	0.29	0.96	0.00790005	0.33	0.34	0.0035	0.0137	0.7978
rs7640424	-0.0136	-0.00433122	0.0105644	0.00634941	0.00364127	0.0154935	0.000908941	0.0018	0.00784146	0.00362175	0.00398932	0.00223556	0.00233376	0.00366467	2.29985e-14	0.580714	0.00350002	0.11	0.1	3.19963e-11	0.8	-0.0116	0.0141	0.4117
rs7652234	-0.0048	-0.00676117	-0.000281008	0.00567314	0.0375649	-0.00102419	0.00764539	0.0046	0.0185749	0.00853497	0.00943343	0.00526303	0.00548762	0.00863675	0.3	0.715865	0.97	0.55	9.49948e-13	0.85	0.38	0.0269	0.0267	0.3141
rs7661090	-0.0029	-0.00530986	-0.00568007	-0.0352894	-0.00578121	0.00251493	0.00211668	0.0028	0.0119549	0.00542649	0.0059614	0.00335238	0.00350045	0.00549096	0.3	0.656931	0.3	3.2e-09	0.0850002	0.47	0.7	0.0191	0.0265	0.4711
rs767943	0.008	0.0130697	-0.0134805	-0.0021919	0.00207833	-0.0186374	-0.00740728	0.002	0.00825581	0.0038163	0.00420949	0.00235391	0.00246006	0.00386069	5.99998e-05	0.113411	0.000409996	0.6	0.38	3.59998e-14	0.0549997	0.0271	0.0158	0.0852295
rs769449	-0.0254	0.00167256	0.0068253	-0.0109661	-0.00803595	-0.00437171	0.00212798	0.0027	0.0108567	0.00506148	0.00558489	0.00312601	0.00326165	0.00511614	2.29985e-20	0.877565	0.18	0.05	0.01	0.18	0.68	-0.0486	0.0185	0.00847891
rs7694732	-0.0099	-0.00596167	0.00290193	-0.00481068	0.00679775	0.00161266	0.00442428	0.0017	0.00731616	0.00336669	0.00371079	0.00207878	0.00217155	0.00340551	8.70001e-09	0.415157	0.39	0.19	0.00109999	0.46	0.19	0.0115	0.0136	0.3959
rs7704281	0.0271	-0.0097602	-0.0120404	-0.00229816	-0.000215366	0.00455177	-0.00159245	0.0041	0.018994	0.00854486	0.00944833	0.00528976	0.00554354	0.00864313	6.4998e-11	0.607356	0.16	0.81	0.97	0.41	0.85	0.059	0.0353	0.0943192
rs7715256	-0.0166	-0.0128528	-0.00323747	-0.00119529	0.00830504	-0.00356371	-0.00277408	0.0016	0.0073371	0.00338212	0.00372481	0.00208717	0.00217587	0.0034212	2.19989e-24	0.079827	0.34	0.75	6.90001e-05	0.1	0.42	0.0103	0.0138	0.452
rs7730004	0.0148	-0.00533625	-0.00641731	0.003092	-0.0137594	-0.00928643	-0.00769958	0.0018	0.00779783	0.00357635	0.00394018	0.0022093	0.00230871	0.00361723	9.09913e-16	0.493775	0.0729995	0.43	4.70002e-10	5.80003e-05	0.0329997	-0.0229	0.0136	0.091791
rs7730898	0.0168	0.0106674	-0.0113642	-0.00752717	-0.00865184	-0.0111189	-0.00973667	0.0018	0.00816965	0.00376547	0.0041445	0.00232404	0.00242749	0.00380862	4.49987e-20	0.191654	0.0025	0.0690001	0.0002	4.60002e-06	0.0109999	0.0078	0.0144	0.5873
rs7779	-0.0009	-0.0341129	-0.00219955	0.0398625	-0.00446347	0.0013042	-0.00692034	0.0034	0.0140005	0.00640659	0.00707203	0.00396028	0.00412284	0.00648694	0.79	0.0148344	0.73	1.7e-08	0.26	0.75	0.29	-0.0564	0.0278	0.0421299
rs7780752	0.0139	-0.00409848	0.00176746	0.000838972	-0.00678091	0.00021885	-0.0006947	0.0018	0.00756404	0.00347361	0.00383514	0.00214608	0.0022431	0.00351449	1e-14	0.587935	0.61	0.83	0.0016	0.92	0.84	0.003	0.0153	0.8463
rs7811342	-0.0197	0.0228437	-0.000548841	0.00940612	0.0176894	-0.000889399	0.00562975	0.0029	0.0121731	0.00562537	0.00618741	0.00346467	0.00361294	0.00569111	1.10002e-11	0.0605857	0.92	0.13	3.29997e-07	0.81	0.32	0.0057	0.0179	0.7491
rs7869771	-0.014	0.018635	0.000699634	-0.00166893	0.0046975	-0.0034243	0.00307734	0.0019	0.00813143	0.00371933	0.00409619	0.00229417	0.0023985	0.00376183	4.90004e-13	0.0219286	0.85	0.68	0.0409996	0.15	0.41	-0.0128	0.0167	0.4444
rs7899106	0.0331	-0.00901424	-0.00655378	0.00846844	-0.00999679	0.0022959	-0.00200533	0.0037	0.0167569	0.00767293	0.00850135	0.0047469	0.00495377	0.00776216	1e-18	0.59062	0.39	0.32	0.0350002	0.64	0.8	0.0103	0.0329	0.754699
rs7903146	-0.0181	-0.00034369	-0.00988316	-0.000221008	0.00356948	-0.000317756	-0.00430483	0.0018	0.00798257	0.00368535	0.00406541	0.00227687	0.00237574	0.00372771	1.29987e-23	0.965658	0.00729995	0.96	0.12	0.89	0.25	0.0145	0.017	0.3923
rs7911962	-0.0023	0.00855783	0.00584293	-0.000970042	-0.00530475	0.0135852	0.0090136	0.0018	0.00746699	0.00345771	0.00381113	0.00213499	0.00222867	0.0034978	0.2	0.251767	0.0909997	0.8	0.0129999	1.09999e-09	0.01	-0.0181	0.0152	0.2331
rs7970953	0.0135	-0.00903161	-0.000148593	-0.00113693	-0.00543026	0.00245002	0.00226114	0.0018	0.00817247	0.00371935	0.00410428	0.00230263	0.00239913	0.00376222	9.79941e-14	0.269114	0.97	0.780001	0.0179999	0.31	0.55	0.0113	0.0147	0.4409
rs7983065	-0.0148	-0.015735	0.00379679	0.00668532	0.00848793	0.00263556	0.0022846	0.0017	0.00727125	0.00336287	0.00370237	0.00207505	0.00216617	0.00339993	8.9002e-18	0.0304719	0.26	0.0710003	4.30002e-05	0.22	0.5	0.0107	0.0136	0.43
rs7998796	0.0105	-0.00392437	-0.00231943	-0.000248658	-0.00203776	0.000294988	-0.00495682	0.0018	0.00776493	0.00354549	0.00390411	0.0021902	0.002288	0.00358487	1.09999e-08	0.613285	0.51	0.95	0.35	0.9	0.17	0.0045	0.014	0.749701
rs8047395	0.0642	0.00554689	0.00251431	0.0081037	-0.024546	0.0013785	-0.000854742	0.0017	0.00726294	0.00335307	0.00369531	0.00206936	0.00216356	0.00339065	0	0.445037	0.450001	0.0280001	1.9002e-32	0.52	0.8	0.0003	0.0135	0.9849
rs806600	-0.0095	0.00231828	0.00387736	0.00277749	0.00177342	0.0040773	-4.40092e-05	0.0017	0.00723829	0.0033471	0.0036866	0.00206447	0.00215752	0.00338575	3.29997e-08	0.748759	0.25	0.450001	0.39	0.0589997	0.99	-0.0278	0.0136	0.0400599
rs809673	0.0009	-0.00937831	-0.00303018	-0.0417213	0.00508273	-0.00169753	-0.000252684	0.0019	0.00744699	0.00341423	0.00376875	0.00210816	0.00220262	0.0034567	0.64	0.207916	0.37	1.69981e-28	0.016	0.44	0.94	0.0154	0.0137	0.2589
rs8097672	0.02	-0.00375082	-0.0168918	-0.00689934	-0.00869377	-0.0153157	-0.0122047	0.0025	0.0102765	0.00478411	0.00528851	0.00295294	0.00308129	0.00483788	8.4004e-16	0.715123	0.000409996	0.19	0.0032	6.69993e-07	0.012	0.032	0.0179	0.0732504
rs8097783	-0.0389	-0.00811162	0.0136708	-0.00857277	0.00297237	0.000603995	0.0197755	0.0031	0.0140032	0.00645061	0.00716264	0.00399625	0.00415212	0.00652366	7.19946e-36	0.562413	0.0340001	0.23	0.46	0.88	0.00239999	-0.024	0.0342	0.4827
rs8181823	0.0127	0.0116049	-0.00105541	-0.00316232	0.0021705	-0.00269032	-0.000283802	0.002	0.00847658	0.00392386	0.00432692	0.00242391	0.00253272	0.00396751	4.09996e-10	0.170992	0.79	0.46	0.37	0.29	0.94	-0.0027	0.0152	0.8575
rs8192675	0.0152	0.0113792	-0.00603784	-0.00372924	-0.003349	-0.00298078	-0.00501523	0.0018	0.00801204	0.00367554	0.00404881	0.00227063	0.00237395	0.00371927	1.39991e-17	0.155543	0.1	0.36	0.14	0.21	0.18	-0.0061	0.0153	0.6889
rs825688	-0.0095	0.00847365	-0.00590587	-0.00513132	-0.00293967	-0.00571049	-0.00287931	0.0017	0.0073423	0.00336751	0.00371469	0.00208247	0.00217542	0.00340534	4.70002e-08	0.248473	0.0790005	0.17	0.16	0.00870001	0.4	0.0007	0.0136	0.9594
rs838039	0.0044	-0.0103473	0.00764873	-0.00690785	-0.00221376	0.0147669	0.00864905	0.0019	0.00780833	0.00360265	0.00397709	0.00222467	0.00232368	0.00364741	0.017	0.185126	0.0340001	0.0819993	0.32	2.1e-10	0.0179999	-0.0089	0.0138	0.5188
rs842548	0.0073	-0.0304579	-0.000405603	-0.00642998	-0.0145504	-0.00562932	-0.000664929	0.0022	0.00913802	0.00418052	0.00461513	0.00258552	0.00270439	0.00423329	0.001	0.000859884	0.92	0.16	1.79999e-08	0.0369999	0.88	0.0171	0.0169	0.3112
rs852033	-0.0121	-0.0108273	0.0100117	-0.0021233	0.0163911	0.00449876	0.00747745	0.002	0.00844689	0.00387903	0.00426291	0.00239562	0.00250227	0.00392169	1.6e-09	0.199921	0.00990011	0.62	7.8001e-12	0.0719996	0.0569994	0.0137	0.0159	0.3895
rs876605	-0.0108	-0.00445915	-0.00117732	0.0037488	0.00648408	-0.00186198	0.000246448	0.002	0.00834595	0.00381144	0.00418579	0.00235028	0.00245505	0.0038554	3.40001e-08	0.593145	0.760001	0.37	0.00580003	0.450001	0.95	-0.026	0.0155	0.0937001
rs889398	-0.0196	-0.00546366	0.0038608	-0.000999083	0.0238251	0.0106206	0.00412683	0.0016	0.00742746	0.00341213	0.00376232	0.00210718	0.00220062	0.00345055	1.29987e-32	0.461978	0.26	0.79	1.20005e-29	1.40001e-06	0.23	-0.0137	0.0137	0.3175
rs9294260	0.0147	0.00818387	-0.00198862	0.00070243	-0.00153419	-0.00193223	0.0021163	0.0016	0.00733464	0.00336949	0.00370799	0.00207521	0.00217074	0.0034087	1.80011e-19	0.264524	0.56	0.85	0.46	0.37	0.53	0.0128	0.0135	0.3421
rs9300422	-0.0103	-0.0120784	0.00784888	-0.00152374	0.00836244	-0.000244223	0.00683102	0.0018	0.00772785	0.00357829	0.00394503	0.00221018	0.00231004	0.0036181	4e-09	0.118069	0.0280001	0.7	0.00015	0.92	0.0589997	-0.0071	0.0149	0.6336
rs9304665	0.0229	0.00912769	0.00475665	0.00158694	-0.0151669	-0.00473975	0.00527445	0.002	0.00863287	0.00394134	0.00434425	0.00243765	0.00254453	0.00398416	2.90001e-29	0.290375	0.23	0.709999	4.90004e-10	0.0629999	0.19	-0.0006	0.015	0.9686
rs9313736	-0.0043	-0.00816913	0.0039331	-0.0314315	0.000389433	0.00246552	0.00384854	0.0018	0.00749289	0.00343098	0.00377284	0.00211841	0.00221423	0.00347066	0.015	0.275611	0.25	8.00018e-17	0.85	0.27	0.27	0.0152	0.0139	0.2734
rs9322076	0.0098	-0.000693139	-0.00247519	-0.00571287	-0.0186098	-0.0110599	-0.0036042	0.0017	0.00734829	0.00337696	0.00372432	0.00208389	0.00217908	0.00341611	2e-08	0.92485	0.46	0.13	4.19952e-19	3.89996e-07	0.29	0.0124	0.0137	0.3626
rs9341625	0.0035	0.00369682	0.000891966	-0.000920453	-0.0233803	0.00108734	0.00363606	0.0021	0.00898513	0.00413593	0.0045594	0.00255099	0.00266852	0.00418447	0.0980009	0.680755	0.83	0.84	4.90004e-20	0.68	0.38	-0.0245	0.0182	0.177
rs9362662	-0.0112	0.0115056	-0.00249052	0.00478711	0.00238759	0.00108764	-0.00356547	0.0017	0.00732231	0.00335232	0.00369183	0.00206789	0.00216617	0.00339133	1.2e-10	0.116121	0.46	0.19	0.25	0.62	0.29	-0.0014	0.0137	0.9186
rs9367368	-0.0121	-0.0111831	0.00859447	-0.00162275	-0.00331116	0.0035867	0.00653041	0.0018	0.00796839	0.00367782	0.00404933	0.00226712	0.00237023	0.00372072	1e-11	0.160499	0.0189998	0.69	0.14	0.13	0.0790005	0.003	0.0139	0.8306
rs9379827	-0.0132	0.00916061	0.0154916	0.00707907	-0.00310568	0.00519773	0.0160039	0.0019	0.00869129	0.00399022	0.00439531	0.00246226	0.00257754	0.00403609	6.89922e-12	0.291892	0.0001	0.11	0.21	0.0439997	7.29995e-05	-0.0449	0.0161	0.00527303
rs9438982	0.0046	-0.00304619	0.00185877	-0.0471437	0.00150845	-0.00331122	-0.00113479	0.0018	0.00775321	0.00357249	0.00394883	0.00220667	0.00230059	0.00361612	0.0129999	0.6944	0.6	7.39946e-33	0.49	0.15	0.75	-0.0121	0.0142	0.3936
rs946824	-0.0206	-0.0141901	0.0121331	0.00387187	0.00451602	0.0067453	0.0126916	0.0026	0.0107601	0.00497045	0.00550323	0.00307339	0.00320599	0.00503179	1.10002e-15	0.187256	0.015	0.48	0.14	0.0350002	0.012	0.0055	0.0191	0.7716
rs947612	-0.0116	0.00173722	-0.00042833	-0.00395725	0.000160252	0.00498176	0.000681004	0.002	0.00840941	0.00387301	0.00426506	0.00238709	0.00249564	0.00391848	5.60003e-09	0.836339	0.91	0.35	0.95	0.0460002	0.86	-0.0126	0.0152	0.4049
rs9491228	-0.0027	0.00478871	-0.00259678	-0.00122151	0.00233362	-0.0141344	0.000231309	0.0017	0.0073091	0.00335308	0.00369272	0.00206904	0.00216535	0.00339249	0.12	0.512362	0.44	0.74	0.26	6.70039e-11	0.95	0.018	0.0147	0.2196
rs9522285	0.0127	-0.00589383	-0.00694199	-0.0124863	-0.00815604	-0.00873579	-0.00824853	0.0017	0.00738719	0.00340067	0.00374268	0.00209827	0.00219247	0.00343805	2.49977e-13	0.424967	0.0409996	0.000850002	0.0001	6.80002e-05	0.016	0.0255	0.0135	0.0585706
rs9538162	-0.0156	0.00348003	0.0126332	-0.00508675	0.00331889	0.00370655	0.0140909	0.0018	0.00736647	0.00339395	0.0037424	0.00209823	0.00218731	0.00343171	4.79954e-19	0.636636	0.0002	0.17	0.11	0.0899995	4e-05	-0.0222	0.0138	0.1072
rs9547153	0.0098	-0.00289591	0.00353658	-0.00208608	-0.00469356	0.00252597	-0.00181394	0.0017	0.00759838	0.00350259	0.00386227	0.00216127	0.00225698	0.00354183	8.70001e-09	0.703114	0.31	0.59	0.0299999	0.26	0.61	0.0014	0.0138	0.9188
rs9571687	-0.0129	-0.000457612	-0.00267088	-0.00953183	0.004801	0.00285766	-0.00503989	0.0018	0.00778326	0.00356486	0.00392084	0.0022019	0.00230059	0.00360434	2.80027e-12	0.953116	0.450001	0.015	0.0290001	0.21	0.16	-0.0152	0.0162	0.3464
rs9616551	-0.0063	-0.00674491	0.0066249	-0.00934759	-0.0158305	-0.0028582	0.00222951	0.0022	0.0091438	0.00421929	0.00465271	0.00260853	0.00272707	0.00426492	0.00389996	0.460733	0.12	0.0449997	1.29999e-09	0.29	0.6	0.0113	0.0148	0.4425
rs9696767	0.002	-0.0120589	-0.0027594	-5.3699e-05	-0.0122001	0.00010061	-0.00247528	0.0018	0.00745536	0.00343667	0.00379215	0.00212144	0.00221922	0.00347615	0.26	0.105786	0.42	0.99	8.9e-09	0.96	0.48	0.0139	0.0143	0.33
rs9806742	0.0208	-0.00102832	-0.00788813	0.00344483	-0.00392386	-0.00655537	-0.00454181	0.0026	0.0107377	0.00498881	0.00551566	0.00308623	0.00322432	0.00504422	1.39991e-15	0.923706	0.11	0.53	0.2	0.0420001	0.37	0.0421	0.0297	0.1562
rs9816226	0.0323	0.00675424	0.00597226	0.00120562	-0.0152196	-0.00288111	0.00669533	0.0021	0.00938383	0.00430989	0.00476698	0.00266056	0.00277814	0.00436047	1.59993e-52	0.47167	0.17	0.8	1.09999e-08	0.3	0.12	0.0125	0.0184	0.4977
rs9845966	-0.0105	-0.0194689	0.00435991	0.00255638	-0.00254458	0.00281275	0.00558116	0.0017	0.00726025	0.0033573	0.00370547	0.00207236	0.00216463	0.00339696	2.5e-10	0.00733179	0.19	0.49	0.22	0.19	0.1	0.0031	0.0135	0.8158
rs987237	0.0409	0.00179306	0.00578128	-0.00942766	-0.0186668	-0.00475137	0.00460688	0.0021	0.0095387	0.00434769	0.00478487	0.00268266	0.00280913	0.00439845	9.30037e-84	0.850895	0.18	0.0490004	3.40017e-12	0.0909997	0.29	0.0104	0.0166	0.5299
rs9873182	0.0184	-0.00440789	-0.0012202	-0.0201623	-0.0204442	-0.0257397	-0.00221835	0.0024	0.00990834	0.00455207	0.0050213	0.00281185	0.00294454	0.00460602	7.39946e-15	0.656419	0.79	5.89997e-05	3.59998e-13	2.29985e-18	0.630001	0.0215	0.0177	0.2251
rs9923553	0.0042	-0.00304183	-0.0157815	-0.00454486	0.000115519	-0.0143033	-0.0114116	0.0019	0.007987	0.00367992	0.00405869	0.00227231	0.00237602	0.0037213	0.0259998	0.703318	1.79999e-05	0.26	0.96	1.7e-09	0.00219999	0.0264	0.0156	0.0895592
rs9926784	-0.0258	-0.00855261	0.00449009	-0.00723275	0.0178264	0.00586376	0.00144384	0.0021	0.00943676	0.00431643	0.00474776	0.002659	0.00278239	0.00436534	9.8992e-35	0.36478	0.3	0.13	1.99986e-11	0.0350002	0.74	0.0017	0.0179	0.9231
rs9927848	-0.0122	-0.000254898	-0.00250387	0.00855046	0.00406383	0.000827517	-0.00460087	0.002	0.00825674	0.00379487	0.00418901	0.00234471	0.00244558	0.00383729	6.4e-10	0.975372	0.51	0.0409996	0.0830004	0.74	0.23	-0.0176	0.017	0.3026
rs993700	-0.0103	0.0116384	0.0117079	0.00739804	-0.00337454	0.0162142	0.00931629	0.0021	0.00873717	0.00400487	0.00442862	0.00247699	0.00258969	0.00405268	5.80003e-07	0.18285	0.00350002	0.0949992	0.17	3.79997e-10	0.0219999	-0.0202	0.016	0.2064
rs9951619	0.0156	-0.00105868	0.00953698	0.00672225	-0.00828348	0.00550863	0.00294251	0.002	0.00865037	0.00398041	0.00439063	0.00246035	0.00256915	0.00402477	1.39991e-15	0.902594	0.017	0.13	0.000759994	0.032	0.46	-0.0063	0.0144	0.664099
rs998732	-0.0171	-0.0131578	0.00570105	0.00105392	0.00920217	0.00456989	0.000838027	0.0022	0.00988561	0.00456984	0.00503494	0.00281712	0.00294527	0.00461959	1.99986e-14	0.183198	0.21	0.83	0.00109999	0.12	0.86	0.0167	0.0224	0.4572
rs9989141	0.0162	0.012783	-0.0145762	-0.00508968	-0.00758226	-0.0138878	-0.00670827	0.0017	0.00756937	0.00347639	0.00383394	0.00214849	0.00224279	0.00351529	3.59998e-21	0.0912725	2.80001e-05	0.18	0.000420001	5.89997e-10	0.0560003	-0.0003	0.0139	0.9819
rs999889	-0.0108	0.00620758	0.00405578	-0.00328665	0.00350907	0.00363544	0.000836518	0.0019	0.00804286	0.00371318	0.00409743	0.00229258	0.00239657	0.00375591	1.40001e-08	0.440231	0.27	0.42	0.13	0.13	0.82	-0.0154	0.0158	0.3311
