# Supplementary material for: A causal examination of the correlation between hormonal and reproductive factors and low back pain
Source: Front Endocrinol (Lausanne). 2024 May 10;15:1326761. doi: 10.3389/fendo.2024.1326761 (PMC11116661; doi:10.3389/fendo.2024.1326761)
Supplement: Supplementary Table S9 — SNPs of LBP for Hormonal and Reproductive Factors in MR. [file Table_9.xlsx]

## Sheet: ANM
Supplementary Table 9 SNPs used as valid instrumental variables for LBP on ANM
SNP	exposure	outcome	effect_allele.exposure	other_allele.exposure	beta.exposure	eaf.exposure	chr	pos	se.outcome	pval.exposure	R2
rs112412403	low back pain	age at menopause	A	G	0.1685	0.03842	6	129060572	0.0117033	3.14601e-06	0.00209784
rs113679764	low back pain	age at menopause	A	G	0.1076	0.09631	19	17486898	0.00818266	2.98497e-06	0.00201533
rs143783757	low back pain	age at menopause	G	A	-0.2201	0.02083	7	79133344	0.014578	4.05695e-06	0.00197614
rs147356029	low back pain	age at menopause	A	G	0.2376	0.01829	7	4042724	0.0116747	3.45502e-06	0.00202731
rs147975827	low back pain	age at menopause	A	G	0.3934	0.007043	4	146734943	0.0165537	2.91099e-06	0.00216465
rs1481789	low back pain	age at menopause	A	G	0.0908	0.159	8	72040468	0.00450453	9.93596e-07	0.00220493
rs2022845	low back pain	age at menopause	T	G	-0.0693	0.3091	14	66343168	0.00385405	2.20602e-06	0.00205121
rs225880	low back pain	age at menopause	C	T	0.0782	0.786	14	30481804	0.00492241	1.937e-06	0.00205722
rs231908	low back pain	age at menopause	G	A	-0.0828	0.7545	11	2751660	0.00443111	1.42099e-07	0.00253981
rs35989721	low back pain	age at menopause	C	T	0.1306	0.1013	6	31404766	0.00870253	5.16202e-09	0.00310556
rs4284332	low back pain	age at menopause	C	T	0.0647	0.5566	10	73733952	0.00379168	2.103e-06	0.00206622
rs56091004	low back pain	age at menopause	T	C	0.1402	0.06074	6	3744847	0.00603148	1.054e-06	0.00224278
rs56807215	low back pain	age at menopause	A	T	-0.1063	0.09947	16	87951030	0.00591857	4.21998e-06	0.00202436
rs60127327	low back pain	age at menopause	G	A	-0.0643	0.4809	12	54627857	0.00374492	2.42198e-06	0.00206423
rs62097992	low back pain	age at menopause	C	T	0.0669	0.4121	18	50835863	0.00373189	1.16501e-06	0.00216864
rs6426282	low back pain	age at menopause	C	T	-0.0803	0.1962	1	246310585	0.00534765	2.26699e-06	0.0020338
rs72726942	low back pain	age at menopause	T	G	0.202	0.02566	15	31876216	0.00965406	3.16898e-06	0.00204033
rs74494106	low back pain	age at menopause	T	C	-0.4741	0.005018	2	20609764	0.0131619	2.83198e-06	0.00224448
rs941157	low back pain	age at menopause	T	C	-0.0644	0.4118	12	90776124	0.00372559	2.75899e-06	0.00200915
rs9469835	low back pain	age at menopause	G	A	0.0729	0.3297	6	34611001	0.00391965	4.82703e-07	0.00234895

## Sheet: AAM
Supplementary Table 9 SNPs used as valid instrumental variables for LBP on AAM
SNP	exposure	outcome	effect_allele.exposure	other_allele.exposure	beta.exposure	eaf.exposure	chr	pos	se.outcome	pval.exposure	R2
rs112412403	low back pain	age at menarche	A	G	0.1685	0.03842	6	129060572	0.0065496	3.14601e-06	0.00209784
rs113679764	low back pain	age at menarche	A	G	0.1076	0.09631	19	17486898	0.00459345	2.98497e-06	0.00201533
rs143783757	low back pain	age at menarche	G	A	-0.2201	0.02083	7	79133344	0.0081664	4.05695e-06	0.00197614
rs147356029	low back pain	age at menarche	A	G	0.2376	0.01829	7	4042724	0.00651464	3.45502e-06	0.00202731
rs147975827	low back pain	age at menarche	A	G	0.3934	0.007043	4	146734943	0.00925338	2.91099e-06	0.00216465
rs1481789	low back pain	age at menarche	A	G	0.0908	0.159	8	72040468	0.00251953	9.93596e-07	0.00220493
rs2022845	low back pain	age at menarche	T	G	-0.0693	0.3091	14	66343168	0.00216236	2.20602e-06	0.00205121
rs225880	low back pain	age at menarche	C	T	0.0782	0.786	14	30481804	0.00275535	1.937e-06	0.00205722
rs231908	low back pain	age at menarche	G	A	-0.0828	0.7545	11	2751660	0.00247888	1.42099e-07	0.00253981
rs35989721	low back pain	age at menarche	C	T	0.1306	0.1013	6	31404766	0.00489063	5.16202e-09	0.00310556
rs4284332	low back pain	age at menarche	C	T	0.0647	0.5566	10	73733952	0.00212539	2.103e-06	0.00206622
rs56091004	low back pain	age at menarche	T	C	0.1402	0.06074	6	3744847	0.00337905	1.054e-06	0.00224278
rs56807215	low back pain	age at menarche	A	T	-0.1063	0.09947	16	87951030	0.00331994	4.21998e-06	0.00202436
rs60127327	low back pain	age at menarche	G	A	-0.0643	0.4809	12	54627857	0.00209721	2.42198e-06	0.00206423
rs62097992	low back pain	age at menarche	C	T	0.0669	0.4121	18	50835863	0.00209328	1.16501e-06	0.00216864
rs6426282	low back pain	age at menarche	C	T	-0.0803	0.1962	1	246310585	0.00299547	2.26699e-06	0.0020338
rs72726942	low back pain	age at menarche	T	G	0.202	0.02566	15	31876216	0.00543869	3.16898e-06	0.00204033
rs74494106	low back pain	age at menarche	T	C	-0.4741	0.005018	2	20609764	0.00740232	2.83198e-06	0.00224448
rs941157	low back pain	age at menarche	T	C	-0.0644	0.4118	12	90776124	0.00208623	2.75899e-06	0.00200915
rs9469835	low back pain	age at menarche	G	A	0.0729	0.3297	6	34611001	0.002192	4.82703e-07	0.00234895

## Sheet: LMC
Supplementary Table 9 SNPs used as valid instrumental variables for LBP on LMC
SNP	exposure	outcome	effect_allele.exposure	other_allele.exposure	beta.exposure	eaf.exposure	chr	pos	se.outcome	pval.exposure	R2
rs112412403	low back pain	length of menstrual cycle	A	G	0.1685	0.03842	6	129060572	0.023092	3.14601e-06	0.00209784
rs113679764	low back pain	length of menstrual cycle	A	G	0.1076	0.09631	19	17486898	0.0163308	2.98497e-06	0.00201533
rs143783757	low back pain	length of menstrual cycle	G	A	-0.2201	0.02083	7	79133344	0.0287642	4.05695e-06	0.00197614
rs147356029	low back pain	length of menstrual cycle	A	G	0.2376	0.01829	7	4042724	0.0230519	3.45502e-06	0.00202731
rs147975827	low back pain	length of menstrual cycle	A	G	0.3934	0.007043	4	146734943	0.0331251	2.91099e-06	0.00216465
rs1481789	low back pain	length of menstrual cycle	A	G	0.0908	0.159	8	72040468	0.00888384	9.93596e-07	0.00220493
rs2022845	low back pain	length of menstrual cycle	T	G	-0.0693	0.3091	14	66343168	0.00762949	2.20602e-06	0.00205121
rs225880	low back pain	length of menstrual cycle	C	T	0.0782	0.786	14	30481804	0.00970688	1.937e-06	0.00205722
rs231908	low back pain	length of menstrual cycle	G	A	-0.0828	0.7545	11	2751660	0.00869417	1.42099e-07	0.00253981
rs35989721	low back pain	length of menstrual cycle	C	T	0.1306	0.1013	6	31404766	0.0170501	5.16202e-09	0.00310556
rs4284332	low back pain	length of menstrual cycle	C	T	0.0647	0.5566	10	73733952	0.00750373	2.103e-06	0.00206622
rs56091004	low back pain	length of menstrual cycle	T	C	0.1402	0.06074	6	3744847	0.0119375	1.054e-06	0.00224278
rs56807215	low back pain	length of menstrual cycle	A	T	-0.1063	0.09947	16	87951030	0.0117122	4.21998e-06	0.00202436
rs60127327	low back pain	length of menstrual cycle	G	A	-0.0643	0.4809	12	54627857	0.00736229	2.42198e-06	0.00206423
rs62097992	low back pain	length of menstrual cycle	C	T	0.0669	0.4121	18	50835863	0.00736855	1.16501e-06	0.00216864
rs6426282	low back pain	length of menstrual cycle	C	T	-0.0803	0.1962	1	246310585	0.0106204	2.26699e-06	0.0020338
rs72726942	low back pain	length of menstrual cycle	T	G	0.202	0.02566	15	31876216	0.019043	3.16898e-06	0.00204033
rs74494106	low back pain	length of menstrual cycle	T	C	-0.4741	0.005018	2	20609764	0.0261725	2.83198e-06	0.00224448
rs941157	low back pain	length of menstrual cycle	T	C	-0.0644	0.4118	12	90776124	0.00728678	2.75899e-06	0.00200915
rs9469835	low back pain	length of menstrual cycle	G	A	0.0729	0.3297	6	34611001	0.00774619	4.82703e-07	0.00234895

## Sheet: AFB
Supplementary Table 9 SNPs used as valid instrumental variables for LBP on FAB
SNP	exposure	outcome	effect_allele.exposure	other_allele.exposure	beta.exposure	eaf.exposure	chr	pos	se.outcome	pval.exposure	R2
rs112412403	low back pain	age at first birth	A	G	0.1685	0.03842	6	129060572	0.010589	3.14601e-06	0.00209784
rs113679764	low back pain	age at first birth	A	G	0.1076	0.09631	19	17486898	0.00739772	2.98497e-06	0.00201533
rs143783757	low back pain	age at first birth	G	A	-0.2201	0.02083	7	79133344	0.0131982	4.05695e-06	0.00197614
rs147356029	low back pain	age at first birth	A	G	0.2376	0.01829	7	4042724	0.0105171	3.45502e-06	0.00202731
rs147975827	low back pain	age at first birth	A	G	0.3934	0.007043	4	146734943	0.0150563	2.91099e-06	0.00216465
rs1481789	low back pain	age at first birth	A	G	0.0908	0.159	8	72040468	0.00408499	9.93596e-07	0.00220493
rs2022845	low back pain	age at first birth	T	G	-0.0693	0.3091	14	66343168	0.00349765	2.20602e-06	0.00205121
rs225880	low back pain	age at first birth	C	T	0.0782	0.786	14	30481804	0.00446763	1.937e-06	0.00205722
rs231908	low back pain	age at first birth	G	A	-0.0828	0.7545	11	2751660	0.00400925	1.42099e-07	0.00253981
rs35989721	low back pain	age at first birth	C	T	0.1306	0.1013	6	31404766	0.00793274	5.16202e-09	0.00310556
rs4284332	low back pain	age at first birth	C	T	0.0647	0.5566	10	73733952	0.00344182	2.103e-06	0.00206622
rs56091004	low back pain	age at first birth	T	C	0.1402	0.06074	6	3744847	0.00547417	1.054e-06	0.00224278
rs56807215	low back pain	age at first birth	A	T	-0.1063	0.09947	16	87951030	0.00536553	4.21998e-06	0.00202436
rs60127327	low back pain	age at first birth	G	A	-0.0643	0.4809	12	54627857	0.0033942	2.42198e-06	0.00206423
rs62097992	low back pain	age at first birth	C	T	0.0669	0.4121	18	50835863	0.00338853	1.16501e-06	0.00216864
rs6426282	low back pain	age at first birth	C	T	-0.0803	0.1962	1	246310585	0.00485995	2.26699e-06	0.0020338
rs72726942	low back pain	age at first birth	T	G	0.202	0.02566	15	31876216	0.00882887	3.16898e-06	0.00204033
rs74494106	low back pain	age at first birth	T	C	-0.4741	0.005018	2	20609764	0.0119614	2.83198e-06	0.00224448
rs941157	low back pain	age at first birth	T	C	-0.0644	0.4118	12	90776124	0.00337501	2.75899e-06	0.00200915
rs9469835	low back pain	age at first birth	G	A	0.0729	0.3297	6	34611001	0.00355437	4.82703e-07	0.00234895

## Sheet: ALB
Supplementary Table 9 SNPs used as valid instrumental variables for LBP on ALB
SNP	exposure	outcome	effect_allele.exposure	other_allele.exposure	beta.exposure	eaf.exposure	chr	pos	se.outcome	pval.exposure	R2
rs112412403	low back pain	Age at last live birth	A	G	0.1685	0.03842	6	129060572	0.0107124	3.14601e-06	0.00209784
rs113679764	low back pain	Age at last live birth	A	G	0.1076	0.09631	19	17486898	0.00748049	2.98497e-06	0.00201533
rs143783757	low back pain	Age at last live birth	G	A	-0.2201	0.02083	7	79133344	0.0133538	4.05695e-06	0.00197614
rs147356029	low back pain	Age at last live birth	A	G	0.2376	0.01829	7	4042724	0.0106381	3.45502e-06	0.00202731
rs147975827	low back pain	Age at last live birth	A	G	0.3934	0.007043	4	146734943	0.0152361	2.91099e-06	0.00216465
rs1481789	low back pain	Age at last live birth	A	G	0.0908	0.159	8	72040468	0.00413135	9.93596e-07	0.00220493
rs2022845	low back pain	Age at last live birth	T	G	-0.0693	0.3091	14	66343168	0.00353689	2.20602e-06	0.00205121
rs225880	low back pain	Age at last live birth	C	T	0.0782	0.786	14	30481804	0.00451776	1.937e-06	0.00205722
rs231908	low back pain	Age at last live birth	G	A	-0.0828	0.7545	11	2751660	0.00405523	1.42099e-07	0.00253981
rs35989721	low back pain	Age at last live birth	C	T	0.1306	0.1013	6	31404766	0.00802498	5.16202e-09	0.00310556
rs4284332	low back pain	Age at last live birth	C	T	0.0647	0.5566	10	73733952	0.00348121	2.103e-06	0.00206622
rs56091004	low back pain	Age at last live birth	T	C	0.1402	0.06074	6	3744847	0.0055373	1.054e-06	0.00224278
rs56807215	low back pain	Age at last live birth	A	T	-0.1063	0.09947	16	87951030	0.00542555	4.21998e-06	0.00202436
rs60127327	low back pain	Age at last live birth	G	A	-0.0643	0.4809	12	54627857	0.00343349	2.42198e-06	0.00206423
rs62097992	low back pain	Age at last live birth	C	T	0.0669	0.4121	18	50835863	0.00342625	1.16501e-06	0.00216864
rs6426282	low back pain	Age at last live birth	C	T	-0.0803	0.1962	1	246310585	0.00491941	2.26699e-06	0.0020338
rs72726942	low back pain	Age at last live birth	T	G	0.202	0.02566	15	31876216	0.00892787	3.16898e-06	0.00204033
rs74494106	low back pain	Age at last live birth	T	C	-0.4741	0.005018	2	20609764	0.0121092	2.83198e-06	0.00224448
rs941157	low back pain	Age at last live birth	T	C	-0.0644	0.4118	12	90776124	0.00341393	2.75899e-06	0.00200915
rs9469835	low back pain	Age at last live birth	G	A	0.0729	0.3297	6	34611001	0.00359559	4.82703e-07	0.00234895

## Sheet: AFS
Supplementary Table 9 SNPs used as valid instrumental variables for LBP on AFS
SNP	exposure	outcome	effect_allele.exposure	other_allele.exposure	beta.exposure	eaf.exposure	chr	pos	se.outcome	pval.exposure	R2
rs112412403	low back pain	Age first had sexual intercourse	A	G	0.1685	0.03842	6	129060572	0.00683824	3.14601e-06	0.00209784
rs113679764	low back pain	Age first had sexual intercourse	A	G	0.1076	0.09631	19	17486898	0.00481156	2.98497e-06	0.00201533
rs143783757	low back pain	Age first had sexual intercourse	G	A	-0.2201	0.02083	7	79133344	0.00845008	4.05695e-06	0.00197614
rs147356029	low back pain	Age first had sexual intercourse	A	G	0.2376	0.01829	7	4042724	0.00681588	3.45502e-06	0.00202731
rs147975827	low back pain	Age first had sexual intercourse	A	G	0.3934	0.007043	4	146734943	0.00964156	2.91099e-06	0.00216465
rs1481789	low back pain	Age first had sexual intercourse	A	G	0.0908	0.159	8	72040468	0.0026309	9.93596e-07	0.00220493
rs2022845	low back pain	Age first had sexual intercourse	T	G	-0.0693	0.3091	14	66343168	0.00225573	2.20602e-06	0.00205121
rs225880	low back pain	Age first had sexual intercourse	C	T	0.0782	0.786	14	30481804	0.00287881	1.937e-06	0.00205722
rs231908	low back pain	Age first had sexual intercourse	G	A	-0.0828	0.7545	11	2751660	0.00258949	1.42099e-07	0.00253981
rs35989721	low back pain	Age first had sexual intercourse	C	T	0.1306	0.1013	6	31404766	0.00510379	5.16202e-09	0.00310556
rs4284332	low back pain	Age first had sexual intercourse	C	T	0.0647	0.5566	10	73733952	0.00222002	2.103e-06	0.00206622
rs56091004	low back pain	Age first had sexual intercourse	T	C	0.1402	0.06074	6	3744847	0.00352772	1.054e-06	0.00224278
rs56807215	low back pain	Age first had sexual intercourse	A	T	-0.1063	0.09947	16	87951030	0.00347222	4.21998e-06	0.00202436
rs6426282	low back pain	Age first had sexual intercourse	C	T	-0.0803	0.1962	1	246310585	0.00313157	2.26699e-06	0.0020338
rs72726942	low back pain	Age first had sexual intercourse	T	G	0.202	0.02566	15	31876216	0.00565286	3.16898e-06	0.00204033
rs74494106	low back pain	Age first had sexual intercourse	T	C	-0.4741	0.005018	2	20609764	0.00771758	2.83198e-06	0.00224448
rs941157	low back pain	Age first had sexual intercourse	T	C	-0.0644	0.4118	12	90776124	0.00217829	2.75899e-06	0.00200915
rs9469835	low back pain	Age first had sexual intercourse	G	A	0.0729	0.3297	6	34611001	0.00228933	4.82703e-07	0.00234895
