# Supplementary material for: A causal examination of the correlation between hormonal and reproductive factors and low back pain
Source: Frontiers journal article supplement (doi:10.3389/fendo.2024.1326761), 2024-05-10
Supplement: Table_2.xlsx [file Table_2.xlsx]

## Sheet: Sheet1
Supplementary Table 2 SNPs used as valid instrumental variables for AAM on LBP
SNP	exposure	outcome	effect_allele.exposure	other_allele.exposure	beta.exposure	eaf.exposure	chr	pos	se.outcome	pval.exposure	id.exposure	R2	F	FMean
rs1005579	age at menarche	low back pain	C	T	-0.0130876	0.454564	22	22300941	0.014	3.40001e-10	ukb-b-3768	8.49354e-05	20.7211	62.3899
rs10063744	age at menarche	low back pain	G	C	0.0136863	0.284018	5	95649772	0.0138	2.59998e-09	ukb-b-3768	7.61816e-05	18.5853	62.3899
rs10090153	age at menarche	low back pain	G	A	0.0145673	0.601944	8	77784096	0.0138	5.10035e-12	ukb-b-3768	0.000101692	24.8096	62.3899
rs10136330	age at menarche	low back pain	T	C	-0.0292842	0.039756	14	30514335	0.0564	3.29997e-08	ukb-b-3768	6.54758e-05	15.9734	62.3899
rs10150677	age at menarche	low back pain	G	C	-0.01471	0.688695	14	93917392	0.0141	4.49987e-11	ukb-b-3768	9.2783e-05	22.6358	62.3899
rs10203978	age at menarche	low back pain	T	C	-0.0142466	0.486063	2	142337743	0.0136	5.50047e-12	ukb-b-3768	0.000101404	24.7392	62.3899
rs10208482	age at menarche	low back pain	A	C	-0.0233933	0.353145	2	199608595	0.0149	7.29962e-27	ukb-b-3768	0.000250019	61.0054	62.3899
rs10226266	age at menarche	low back pain	G	A	0.0122202	0.588278	7	32941119	0.0136	7.10003e-09	ukb-b-3768	7.23391e-05	17.6478	62.3899
rs10810065	age at menarche	low back pain	C	T	-0.0140758	0.258443	9	13982870	0.0149	2.30001e-09	ukb-b-3768	7.59426e-05	18.527	62.3899
rs10860153	age at menarche	low back pain	G	A	-0.0130358	0.336726	12	97541532	0.0159	3.09999e-09	ukb-b-3768	7.59058e-05	18.518	62.3899
rs10861880	age at menarche	low back pain	C	T	-0.0122745	0.503131	12	108611474	0.0137	2.69998e-09	ukb-b-3768	7.53287e-05	18.3772	62.3899
rs10895141	age at menarche	low back pain	C	A	0.0206238	0.669791	11	101436741	0.0138	6.59933e-21	ukb-b-3768	0.000188146	45.9054	62.3899
rs11030104	age at menarche	low back pain	G	A	0.0196928	0.202637	11	27684517	0.0181	1.69981e-14	ukb-b-3768	0.00012532	30.5746	62.3899
rs11031006	age at menarche	low back pain	A	G	0.0209309	0.142341	11	30226528	0.0181	1.69981e-12	ukb-b-3768	0.000106967	26.0966	62.3899
rs11039266	age at menarche	low back pain	G	T	0.0187509	0.279482	11	47532395	0.0174	3.40017e-16	ukb-b-3768	0.000141603	34.5478	62.3899
rs11047473	age at menarche	low back pain	A	G	0.0140596	0.335663	12	24634741	0.0141	1.40001e-10	ukb-b-3768	8.81592e-05	21.5076	62.3899
rs11130329	age at menarche	low back pain	A	C	-0.0201635	0.858092	3	52896855	0.0227	9.3994e-12	ukb-b-3768	9.90154e-05	24.1564	62.3899
rs111401540	age at menarche	low back pain	A	T	-0.0149353	0.255125	17	6040233	0.0174	3.29997e-10	ukb-b-3768	8.47802e-05	20.6832	62.3899
rs11218864	age at menarche	low back pain	C	T	0.017921	0.141223	11	122726166	0.0177	1.5e-09	ukb-b-3768	7.79005e-05	19.0047	62.3899
rs11228700	age at menarche	low back pain	T	C	-0.0129536	0.389066	11	56419115	0.0167	1.09999e-09	ukb-b-3768	7.9768e-05	19.4603	62.3899
rs113467400	age at menarche	low back pain	T	C	-0.0201047	0.088509	2	11720299	0.0297	3.79997e-08	ukb-b-3768	6.52176e-05	15.9104	62.3899
rs113772882	age at menarche	low back pain	T	G	-0.012824	0.303595	7	1642196	0.0176	1.89998e-08	ukb-b-3768	6.95398e-05	16.9649	62.3899
rs114285994	age at menarche	low back pain	A	G	0.0247828	0.138747	16	19935763	0.0236	1.20005e-16	ukb-b-3768	0.000146786	35.8126	62.3899
rs11605776	age at menarche	low back pain	A	C	-0.0233182	0.711371	11	13318524	0.015	1.50003e-24	ukb-b-3768	0.000223283	54.4803	62.3899
rs11619721	age at menarche	low back pain	T	G	-0.0216554	0.091193	13	112082513	0.0281	2.5e-09	ukb-b-3768	7.77312e-05	18.9634	62.3899
rs11678561	age at menarche	low back pain	G	C	-0.0131328	0.268381	2	164539038	0.0145	1.6e-08	ukb-b-3768	6.77301e-05	16.5233	62.3899
rs1172955	age at menarche	low back pain	A	T	-0.0251205	0.709964	10	97877320	0.0153	2.29985e-28	ukb-b-3768	0.000259881	63.4124	62.3899
rs11738611	age at menarche	low back pain	A	C	0.0145574	0.213119	5	156772974	0.0172	7.39997e-09	ukb-b-3768	7.1077e-05	17.3399	62.3899
rs11746435	age at menarche	low back pain	T	A	0.0142859	0.232121	5	137006762	0.0158	5.69994e-09	ukb-b-3768	7.27533e-05	17.7489	62.3899
rs11875135	age at menarche	low back pain	A	T	0.0238611	0.070522	18	57892769	0.0194	4e-09	ukb-b-3768	7.46405e-05	18.2093	62.3899
rs11893331	age at menarche	low back pain	G	A	0.0331922	0.169819	2	56577406	0.0154	1.39991e-33	ukb-b-3768	0.000310643	75.8023	62.3899
rs12040029	age at menarche	low back pain	T	C	-0.0195567	0.122633	1	213451958	0.0233	2.80001e-09	ukb-b-3768	8.23019e-05	20.0785	62.3899
rs12134472	age at menarche	low back pain	T	C	-0.0157792	0.430645	1	199865112	0.014	3.59998e-14	ukb-b-3768	0.000122096	29.7881	62.3899
rs12141660	age at menarche	low back pain	T	C	-0.0130223	0.285995	1	73195560	0.0142	1.2e-08	ukb-b-3768	6.92572e-05	16.8959	62.3899
rs12211649	age at menarche	low back pain	A	G	0.0350757	0.085437	6	100172277	0.0253	2.80027e-21	ukb-b-3768	0.000192266	46.9108	62.3899
rs12344679	age at menarche	low back pain	A	G	-0.0120482	0.387641	9	92245439	0.0142	1.29999e-08	ukb-b-3768	6.89144e-05	16.8123	62.3899
rs12360772	age at menarche	low back pain	A	G	-0.0158553	0.186596	11	1899962	0.0171	2.59998e-09	ukb-b-3768	7.63111e-05	18.6169	62.3899
rs12460629	age at menarche	low back pain	A	G	0.0168159	0.188297	19	18836741	0.0155	2.5e-10	ukb-b-3768	8.64392e-05	21.088	62.3899
rs12532356	age at menarche	low back pain	A	G	0.0179869	0.173812	7	121979635	0.0168	4.30031e-11	ukb-b-3768	9.29183e-05	22.6688	62.3899
rs12543893	age at menarche	low back pain	T	C	0.0173601	0.223275	8	54029169	0.0177	2.70023e-12	ukb-b-3768	0.00010453	25.502	62.3899
rs12550650	age at menarche	low back pain	T	C	0.0173466	0.452215	8	4550990	0.0136	7.59976e-17	ukb-b-3768	0.000149078	36.3718	62.3899
rs12592315	age at menarche	low back pain	G	A	-0.0117319	0.545428	15	68040266	0.0135	1.79999e-08	ukb-b-3768	6.82507e-05	16.6503	62.3899
rs12607903	age at menarche	low back pain	T	C	-0.0213151	0.720833	18	3817134	0.0144	2.80027e-20	ukb-b-3768	0.000182854	44.6138	62.3899
rs12641981	age at menarche	low back pain	T	C	-0.0162869	0.433566	4	45179883	0.0135	5.70033e-15	ukb-b-3768	0.00013029	31.7874	62.3899
rs12728183	age at menarche	low back pain	T	C	-0.0159044	0.534976	1	102510732	0.0136	1.9002e-14	ukb-b-3768	0.000125856	30.7055	62.3899
rs12878738	age at menarche	low back pain	T	C	-0.0197574	0.695861	14	60935281	0.0167	1.29987e-18	ukb-b-3768	0.000165228	40.3128	62.3899
rs12891481	age at menarche	low back pain	T	C	-0.013301	0.484602	14	78426863	0.0138	1.7e-10	ukb-b-3768	8.83744e-05	21.5601	62.3899
rs13022337	age at menarche	low back pain	G	A	-0.0312604	0.828335	2	632609	0.0184	2.49977e-30	ukb-b-3768	0.000277912	67.8132	62.3899
rs13233916	age at menarche	low back pain	G	C	0.0237794	0.0892	7	138874416	0.0202	5.19996e-11	ukb-b-3768	9.18797e-05	22.4154	62.3899
rs13279589	age at menarche	low back pain	T	C	-0.0138306	0.244736	8	87477723	0.0155	8.60003e-09	ukb-b-3768	7.07145e-05	17.2515	62.3899
rs13322435	age at menarche	low back pain	G	A	-0.016296	0.40442	3	156795468	0.0143	1.29987e-14	ukb-b-3768	0.000127928	31.2109	62.3899
rs1361108	age at menarche	low back pain	T	C	-0.0208891	0.457596	6	126767600	0.0135	6.20012e-24	ukb-b-3768	0.000216608	52.8512	62.3899
rs1362376	age at menarche	low back pain	C	T	-0.0192016	0.191108	16	52291939	0.0175	2.70023e-13	ukb-b-3768	0.000113992	27.8106	62.3899
rs141344917	age at menarche	low back pain	A	G	-0.0338561	0.063042	5	111134797	0.0328	5.79963e-15	ukb-b-3768	0.000135411	33.0369	62.3899
rs141829833	age at menarche	low back pain	T	C	0.0582767	0.02286	3	51776104	0.0565	1e-16	ukb-b-3768	0.000151724	37.0174	62.3899
rs142058842	age at menarche	low back pain	G	C	0.0331631	0.165985	2	156621725	0.0196	4.70002e-33	ukb-b-3768	0.000304497	74.3022	62.3899
rs1516883	age at menarche	low back pain	A	G	-0.0443187	0.314844	9	108907267	0.0143	2.39994e-88	ukb-b-3768	0.000847401	206.892	62.3899
rs1544543	age at menarche	low back pain	G	A	0.0165907	0.212136	10	117615483	0.0166	6.09958e-11	ukb-b-3768	9.20079e-05	22.4467	62.3899
rs1555406	age at menarche	low back pain	T	C	-0.0194845	0.117349	14	101204235	0.0172	1.40001e-09	ukb-b-3768	7.86461e-05	19.1866	62.3899
rs16841741	age at menarche	low back pain	G	A	0.0247088	0.109869	2	209637598	0.0218	6.4003e-14	ukb-b-3768	0.000119416	29.134	62.3899
rs16860342	age at menarche	low back pain	T	C	0.018305	0.425249	3	185652947	0.0138	1.80011e-18	ukb-b-3768	0.000163792	39.9623	62.3899
rs17006627	age at menarche	low back pain	C	G	0.0200249	0.198752	2	61389609	0.0167	1.10002e-14	ukb-b-3768	0.000127717	31.1596	62.3899
rs17053711	age at menarche	low back pain	A	G	0.0137707	0.261685	8	25311269	0.0146	4.49997e-09	ukb-b-3768	7.32761e-05	17.8764	62.3899
rs17817628	age at menarche	low back pain	G	A	-0.017391	0.288936	17	53174727	0.0148	2.70023e-14	ukb-b-3768	0.000124277	30.3201	62.3899
rs183993	age at menarche	low back pain	A	G	0.0119606	0.586381	4	95130025	0.0138	1.29999e-08	ukb-b-3768	6.93931e-05	16.9291	62.3899
rs190286519	age at menarche	low back pain	T	A	-0.0213495	0.121026	2	203365009	0.0206	1.39991e-11	ukb-b-3768	9.69751e-05	23.6586	62.3899
rs192558	age at menarche	low back pain	T	C	-0.0275333	0.36358	1	165408986	0.014	2.99985e-37	ukb-b-3768	0.000350825	85.6109	62.3899
rs1933801	age at menarche	low back pain	T	C	-0.0620524	0.679645	6	105365725	0.0146	1.79887e-173	ukb-b-3768	0.00167672	409.71	62.3899
rs2046548	age at menarche	low back pain	T	C	-0.0173582	0.221118	9	11807272	0.0179	3.19963e-12	ukb-b-3768	0.000103785	25.3202	62.3899
rs2048113	age at menarche	low back pain	C	A	-0.0163414	0.314653	6	54577218	0.0142	2.09991e-13	ukb-b-3768	0.000115173	28.0988	62.3899
rs2049618	age at menarche	low back pain	T	A	-0.0127591	0.278544	12	19988923	0.0139	3.29997e-08	ukb-b-3768	6.54295e-05	15.9621	62.3899
rs2051189	age at menarche	low back pain	C	A	-0.0124474	0.50761	21	35322015	0.0135	1.79999e-09	ukb-b-3768	7.74509e-05	18.895	62.3899
rs2067711	age at menarche	low back pain	G	T	-0.012672	0.277622	9	105706469	0.016	3.79997e-08	ukb-b-3768	6.44078e-05	15.7128	62.3899
rs2076308	age at menarche	low back pain	C	G	-0.0186496	0.180245	6	50791640	0.0166	3.59998e-12	ukb-b-3768	0.000102782	25.0754	62.3899
rs2123990	age at menarche	low back pain	G	C	0.0181483	0.413939	11	8400506	0.0139	6.4003e-18	ukb-b-3768	0.000159802	38.9885	62.3899
rs2167378	age at menarche	low back pain	T	C	-0.0183531	0.43765	2	200045258	0.0139	9.60064e-19	ukb-b-3768	0.000165799	40.4521	62.3899
rs2234362	age at menarche	low back pain	C	G	0.0333845	0.05511	19	36203335	0.0344	1.80011e-13	ukb-b-3768	0.000116073	28.3184	62.3899
rs2254479	age at menarche	low back pain	A	G	-0.015924	0.550438	6	41831143	0.0136	1.39991e-14	ukb-b-3768	0.000125497	30.6178	62.3899
rs2297605	age at menarche	low back pain	A	G	0.0184958	0.46171	9	127255448	0.0136	1.20005e-18	ukb-b-3768	0.000170044	41.488	62.3899
rs2343506	age at menarche	low back pain	C	A	0.0133464	0.598116	1	162892924	0.0137	2.99999e-10	ukb-b-3768	8.56336e-05	20.8914	62.3899
rs2422137	age at menarche	low back pain	A	C	-0.0143644	0.453986	1	72619961	0.0135	4.30031e-12	ukb-b-3768	0.000102294	24.9564	62.3899
rs2428493	age at menarche	low back pain	A	C	0.0170355	0.410754	6	31329135	0.0147	4.40048e-16	ukb-b-3768	0.000140481	34.2741	62.3899
rs2454055	age at menarche	low back pain	C	T	0.0156285	0.500256	10	126859832	0.0139	3.69999e-14	ukb-b-3768	0.000122125	29.795	62.3899
rs246180	age at menarche	low back pain	A	C	0.024272	0.325606	16	14391923	0.0142	8.19974e-28	ukb-b-3768	0.00025873	63.1315	62.3899
rs2524158	age at menarche	low back pain	C	A	0.0191556	0.216713	6	31260318	0.0547	3.50026e-12	ukb-b-3768	0.000124574	30.3926	62.3899
rs2613766	age at menarche	low back pain	C	T	0.0115009	0.473411	19	5066995	0.0135	2.69998e-08	ukb-b-3768	6.59483e-05	16.0886	62.3899
rs2659005	age at menarche	low back pain	T	C	-0.0133095	0.443046	17	79218714	0.0136	1.7e-10	ukb-b-3768	8.74222e-05	21.3278	62.3899
rs2668767	age at menarche	low back pain	C	T	0.0247595	0.570724	18	44785302	0.0143	2.39994e-32	ukb-b-3768	0.000300384	73.2982	62.3899
rs2679894	age at menarche	low back pain	G	A	-0.022806	0.575649	2	105870779	0.0136	1.29987e-27	ukb-b-3768	0.000254104	62.0024	62.3899
rs2697961	age at menarche	low back pain	T	C	-0.0237364	0.841992	1	14153333	0.0169	6.20012e-17	ukb-b-3768	0.000149916	36.5762	62.3899
rs27161	age at menarche	low back pain	A	C	-0.0130451	0.274026	5	34928716	0.0159	1.89998e-08	ukb-b-3768	6.77076e-05	16.5179	62.3899
rs2764261	age at menarche	low back pain	G	A	-0.0153798	0.625538	6	108927842	0.0137	5.50047e-13	ukb-b-3768	0.000110814	27.0351	62.3899
rs2798224	age at menarche	low back pain	A	G	0.0131267	0.568396	4	3267668	0.0142	2.99999e-10	ukb-b-3768	8.4543e-05	20.6253	62.3899
rs2953330	age at menarche	low back pain	T	G	0.0121035	0.625411	1	244024121	0.0138	1.5e-08	ukb-b-3768	6.86392e-05	16.7451	62.3899
rs3136247	age at menarche	low back pain	G	A	0.016269	0.192621	2	48013099	0.0205	5e-10	ukb-b-3768	8.23252e-05	20.0842	62.3899
rs34768269	age at menarche	low back pain	C	T	-0.0159629	0.191838	17	77952751	0.0173	1.2e-09	ukb-b-3768	7.90108e-05	19.2756	62.3899
rs34774200	age at menarche	low back pain	T	C	-0.0143834	0.206741	20	54876504	0.0207	2.5e-08	ukb-b-3768	6.7857e-05	16.5543	62.3899
rs35005436	age at menarche	low back pain	C	T	-0.0240794	0.159281	7	74134911	0.0215	1.9002e-17	ukb-b-3768	0.000155287	37.887	62.3899
rs35255016	age at menarche	low back pain	T	C	0.0152962	0.23743	20	37294739	0.0151	3.09999e-10	ukb-b-3768	8.47252e-05	20.6698	62.3899
rs35375873	age at menarche	low back pain	C	G	0.0218534	0.111876	5	43190647	0.018	4.00037e-11	ukb-b-3768	9.49027e-05	23.153	62.3899
rs35436838	age at menarche	low back pain	G	T	0.0376738	0.047044	9	77273910	0.0427	1.9002e-14	ukb-b-3768	0.000127258	31.0476	62.3899
rs35917007	age at menarche	low back pain	G	A	0.0194369	0.533541	19	1849147	0.0136	5.40008e-21	ukb-b-3768	0.000188047	45.8811	62.3899
rs35961679	age at menarche	low back pain	A	G	-0.0130655	0.255262	17	77832212	0.0181	3.69999e-08	ukb-b-3768	6.4904e-05	15.8338	62.3899
rs36087932	age at menarche	low back pain	A	G	0.0170261	0.137749	5	135615616	0.0223	1.40001e-08	ukb-b-3768	6.88625e-05	16.7996	62.3899
rs3743266	age at menarche	low back pain	C	T	-0.0201453	0.335744	15	60781513	0.0161	4.10015e-20	ukb-b-3768	0.000181018	44.1658	62.3899
rs3810291	age at menarche	low back pain	A	G	-0.0170572	0.675861	19	47569003	0.014	1.10002e-14	ukb-b-3768	0.000127478	31.1011	62.3899
rs3827103	age at menarche	low back pain	A	G	0.0224695	0.08291	20	54824029	0.0235	2e-09	ukb-b-3768	7.67778e-05	18.7308	62.3899
rs3828002	age at menarche	low back pain	A	G	0.0129467	0.548329	20	19702049	0.0137	6.29999e-10	ukb-b-3768	8.30255e-05	20.2551	62.3899
rs4073513	age at menarche	low back pain	G	A	0.0137912	0.709481	11	46071253	0.0145	1.2e-09	ukb-b-3768	7.8406e-05	19.128	62.3899
rs4141153	age at menarche	low back pain	G	A	0.0281279	0.196936	7	41467946	0.0156	2.29985e-27	ukb-b-3768	0.000250253	61.0626	62.3899
rs4515148	age at menarche	low back pain	T	G	0.0155879	0.729071	4	28789879	0.0157	1.99986e-11	ukb-b-3768	9.5991e-05	23.4185	62.3899
rs4660257	age at menarche	low back pain	C	T	-0.0202852	0.298682	1	44148168	0.0143	2.29985e-19	ukb-b-3768	0.00017239	42.0605	62.3899
rs4664605	age at menarche	low back pain	T	C	-0.0165058	0.647364	2	153573528	0.0157	2.99985e-14	ukb-b-3768	0.000124388	30.3472	62.3899
rs4735761	age at menarche	low back pain	C	A	-0.0181669	0.285612	8	78097161	0.0163	1.80011e-15	ukb-b-3768	0.00013468	32.8585	62.3899
rs4738266	age at menarche	low back pain	T	C	0.0134075	0.682103	8	73455936	0.015	1.7e-09	ukb-b-3768	7.79582e-05	19.0188	62.3899
rs4755720	age at menarche	low back pain	T	C	0.017728	0.607694	11	43628749	0.014	6.70039e-17	ukb-b-3768	0.000149851	36.5604	62.3899
rs4771121	age at menarche	low back pain	A	G	0.0143963	0.275093	13	28018370	0.0159	5.89997e-10	ukb-b-3768	8.26597e-05	20.1658	62.3899
rs4857841	age at menarche	low back pain	A	G	0.0176633	0.267883	3	128046643	0.0146	3.40017e-14	ukb-b-3768	0.000122377	29.8565	62.3899
rs4875259	age at menarche	low back pain	C	T	-0.0137417	0.6366	8	3766430	0.0143	1.7e-10	ukb-b-3768	8.737e-05	21.3151	62.3899
rs4877593	age at menarche	low back pain	T	A	-0.0133465	0.322914	9	83221000	0.0137	1.5e-09	ukb-b-3768	7.78925e-05	19.0027	62.3899
rs539515	age at menarche	low back pain	C	A	-0.0288923	0.204743	1	177889025	0.0177	1.29987e-29	ukb-b-3768	0.000271838	66.3308	62.3899
rs545075	age at menarche	low back pain	C	G	0.0280331	0.94641	11	94071678	0.0268	9.20005e-10	ukb-b-3768	7.97141e-05	19.4472	62.3899
rs55732507	age at menarche	low back pain	C	T	0.0136211	0.398766	16	30141985	0.0137	1.2e-10	ukb-b-3768	8.89644e-05	21.7041	62.3899
rs55749651	age at menarche	low back pain	A	G	0.0133477	0.378749	6	76294593	0.015	3.59998e-10	ukb-b-3768	8.3842e-05	20.4543	62.3899
rs55876427	age at menarche	low back pain	A	G	0.0140315	0.420021	13	100564082	0.0138	2.80027e-11	ukb-b-3768	9.59227e-05	23.4018	62.3899
rs561821	age at menarche	low back pain	T	C	-0.0175362	0.37766	15	41427864	0.0148	2.19989e-16	ukb-b-3768	0.000144554	35.2679	62.3899
rs5742915	age at menarche	low back pain	C	T	0.0161305	0.461101	15	74336633	0.0137	7.19946e-15	ukb-b-3768	0.000129309	31.548	62.3899
rs583887	age at menarche	low back pain	C	T	0.0143892	0.801361	11	65644027	0.0184	2.5e-08	ukb-b-3768	6.59168e-05	16.0809	62.3899
rs59072247	age at menarche	low back pain	T	C	0.0489499	0.030027	2	73536689	0.0733	8.80035e-16	ukb-b-3768	0.000139574	34.0528	62.3899
rs6007594	age at menarche	low back pain	A	G	0.0128885	0.260408	22	45728370	0.0159	4e-08	ukb-b-3768	6.39855e-05	15.6097	62.3899
rs61371450	age at menarche	low back pain	A	G	-0.0204651	0.176497	11	16786905	0.0245	4.70002e-14	ukb-b-3768	0.000121748	29.703	62.3899
rs61655108	age at menarche	low back pain	A	G	0.0148592	0.239524	20	33455008	0.0168	8.60003e-10	ukb-b-3768	8.04369e-05	19.6235	62.3899
rs61779781	age at menarche	low back pain	C	T	0.0149309	0.427133	1	65934354	0.0139	7.70016e-13	ukb-b-3768	0.000109099	26.6166	62.3899
rs62048402	age at menarche	low back pain	A	G	-0.030691	0.401508	16	53803223	0.0137	4.90004e-48	ukb-b-3768	0.000452694	110.481	62.3899
rs62106258	age at menarche	low back pain	C	T	0.0565703	0.048774	2	417167	0.0485	2.80027e-32	ukb-b-3768	0.000296947	72.4594	62.3899
rs62306664	age at menarche	low back pain	A	C	0.0160662	0.19994	4	132799133	0.0174	9.20005e-10	ukb-b-3768	8.25807e-05	20.1466	62.3899
rs62376854	age at menarche	low back pain	G	A	-0.028516	0.057593	5	110569130	0.0285	2e-10	ukb-b-3768	8.82705e-05	21.5348	62.3899
rs62379978	age at menarche	low back pain	G	T	0.0318755	0.151825	5	133915969	0.0165	5.19996e-28	ukb-b-3768	0.000261681	63.8518	62.3899
rs62507083	age at menarche	low back pain	T	G	-0.0174403	0.119679	8	53842780	0.0211	4.30002e-08	ukb-b-3768	6.4091e-05	15.6355	62.3899
rs62520182	age at menarche	low back pain	T	C	0.0270222	0.148406	8	140646051	0.0161	8.49963e-20	ukb-b-3768	0.000184568	45.0321	62.3899
rs6712986	age at menarche	low back pain	C	T	-0.0211673	0.1222	2	25126046	0.0289	1.69981e-11	ukb-b-3768	9.61231e-05	23.4507	62.3899
rs697049	age at menarche	low back pain	T	C	-0.0153941	0.659166	9	1616908	0.0159	1.69981e-12	ukb-b-3768	0.000106482	25.9782	62.3899
rs7048426	age at menarche	low back pain	A	C	-0.0159243	0.269771	9	11739159	0.0178	2.29985e-11	ukb-b-3768	9.99091e-05	24.3745	62.3899
rs7073746	age at menarche	low back pain	G	A	0.0134021	0.472298	10	64904071	0.0135	9.49948e-11	ukb-b-3768	8.95325e-05	21.8427	62.3899
rs7073961	age at menarche	low back pain	T	C	-0.0215373	0.920464	10	123663470	0.0256	1.7e-08	ukb-b-3768	6.79177e-05	16.5691	62.3899
rs7115813	age at menarche	low back pain	G	A	0.0280242	0.551621	11	122832074	0.0136	2.09991e-41	ukb-b-3768	0.000388492	94.8064	62.3899
rs7132908	age at menarche	low back pain	A	G	-0.0143563	0.384211	12	50263148	0.0139	1.39991e-11	ukb-b-3768	9.75252e-05	23.7928	62.3899
rs7161194	age at menarche	low back pain	G	A	0.0160838	0.664093	14	101529005	0.015	2.09991e-12	ukb-b-3768	0.000115413	28.1574	62.3899
rs7178532	age at menarche	low back pain	A	G	0.0215465	0.695152	15	23794517	0.0144	8.19974e-22	ukb-b-3768	0.000196764	48.0086	62.3899
rs72767997	age at menarche	low back pain	C	T	0.0358513	0.028534	15	99288741	0.0792	1.29999e-08	ukb-b-3768	7.12574e-05	17.3839	62.3899
rs73204208	age at menarche	low back pain	G	T	0.0200946	0.12898	21	37791466	0.0175	8.80035e-11	ukb-b-3768	9.07276e-05	22.1343	62.3899
rs73205548	age at menarche	low back pain	T	C	0.0175946	0.156374	3	132607325	0.0158	7.49998e-10	ukb-b-3768	8.16777e-05	19.9262	62.3899
rs7463166	age at menarche	low back pain	G	A	-0.0146095	0.37395	8	4833790	0.0141	7.39946e-12	ukb-b-3768	9.99363e-05	24.3811	62.3899
rs752278	age at menarche	low back pain	A	G	-0.0211905	0.421367	15	89037134	0.0143	1.59993e-23	ukb-b-3768	0.000218966	53.4266	62.3899
rs7553348	age at menarche	low back pain	A	G	0.0260579	0.562415	1	75005067	0.0135	5.79963e-36	ukb-b-3768	0.000334217	81.5567	62.3899
rs75544266	age at menarche	low back pain	T	C	0.0356147	0.055947	4	104584997	0.0376	2.39994e-15	ukb-b-3768	0.000133987	32.6894	62.3899
rs7560791	age at menarche	low back pain	C	G	0.0121194	0.324572	2	157582917	0.0144	4e-08	ukb-b-3768	6.43995e-05	15.7107	62.3899
rs7563777	age at menarche	low back pain	C	T	-0.0134158	0.515968	2	137512418	0.0136	7.8001e-11	ukb-b-3768	8.99001e-05	21.9324	62.3899
rs7652234	age at menarche	low back pain	G	C	0.0375649	0.041119	3	24190459	0.0267	9.49948e-13	ukb-b-3768	0.000111276	27.1479	62.3899
rs7727787	age at menarche	low back pain	A	G	-0.0191551	0.134618	5	180653039	0.0216	2.5e-10	ukb-b-3768	8.54889e-05	20.8561	62.3899
rs7742131	age at menarche	low back pain	G	T	-0.0124536	0.290245	6	100723855	0.0154	4.09996e-08	ukb-b-3768	6.38988e-05	15.5886	62.3899
rs78352137	age at menarche	low back pain	C	T	-0.0316275	0.111605	14	100920416	0.0255	5.90065e-22	ukb-b-3768	0.000198358	48.3974	62.3899
rs7852169	age at menarche	low back pain	G	C	0.0455731	0.08261	9	114318394	0.0259	6.20012e-34	ukb-b-3768	0.000314799	76.817	62.3899
rs7853970	age at menarche	low back pain	C	T	-0.019012	0.536328	9	86715566	0.0135	9.79941e-20	ukb-b-3768	0.000179774	43.8623	62.3899
rs7854743	age at menarche	low back pain	T	A	0.026527	0.063947	9	75943800	0.029	3.2e-10	ukb-b-3768	8.42417e-05	20.5518	62.3899
rs7915178	age at menarche	low back pain	C	T	0.0184815	0.548323	10	1734473	0.0137	1.9002e-18	ukb-b-3768	0.000169188	41.279	62.3899
rs8112411	age at menarche	low back pain	A	G	0.0235928	0.625022	19	9991735	0.0138	1.99986e-28	ukb-b-3768	0.00026091	63.6634	62.3899
rs842548	age at menarche	low back pain	C	A	-0.0145504	0.799987	2	184262798	0.0169	1.79999e-08	ukb-b-3768	6.77518e-05	16.5286	62.3899
rs852033	age at menarche	low back pain	C	A	0.0163911	0.752402	20	17085493	0.0159	7.8001e-12	ukb-b-3768	0.000100102	24.4216	62.3899
rs913588	age at menarche	low back pain	A	G	-0.0186095	0.51535	9	7174673	0.0135	1.9002e-19	ukb-b-3768	0.000172994	42.2077	62.3899
rs9322076	age at menarche	low back pain	T	C	-0.0186098	0.551428	6	100952020	0.0137	4.19952e-19	ukb-b-3768	0.00017133	41.8018	62.3899
rs9341625	age at menarche	low back pain	T	C	-0.0233803	0.20543	6	77709617	0.0182	4.90004e-20	ukb-b-3768	0.000178454	43.5402	62.3899
rs9397414	age at menarche	low back pain	G	A	-0.0136894	0.316362	6	151806283	0.0145	7.10003e-10	ukb-b-3768	8.10605e-05	19.7757	62.3899
rs9542595	age at menarche	low back pain	A	G	0.013156	0.308715	13	71722247	0.0147	4.90004e-09	ukb-b-3768	7.38742e-05	18.0223	62.3899
rs9568117	age at menarche	low back pain	C	A	0.0188351	0.159945	13	49452803	0.0196	2.60016e-11	ukb-b-3768	9.53332e-05	23.258	62.3899
rs9592952	age at menarche	low back pain	C	A	0.0132879	0.41909	13	74525794	0.0136	2.30001e-10	ukb-b-3768	8.59724e-05	20.9741	62.3899
rs9594366	age at menarche	low back pain	T	C	0.0148672	0.350836	13	40368601	0.0142	7.50067e-12	ukb-b-3768	0.000100681	24.5628	62.3899
rs9616551	age at menarche	low back pain	G	A	-0.0158305	0.802113	22	49680429	0.0148	1.29999e-09	ukb-b-3768	7.95558e-05	19.4086	62.3899
rs9635759	age at menarche	low back pain	A	G	0.0273668	0.303865	17	49613785	0.0144	8.60003e-33	ukb-b-3768	0.000316849	77.3172	62.3899
rs9696767	age at menarche	low back pain	G	A	-0.0122001	0.406705	9	92515702	0.0143	8.9e-09	ukb-b-3768	7.18302e-05	17.5237	62.3899
rs9757252	age at menarche	low back pain	C	T	0.0208834	0.617131	3	86894478	0.0139	9.30037e-23	ukb-b-3768	0.000206091	50.2847	62.3899
rs9816563	age at menarche	low back pain	C	T	0.0127161	0.501639	3	24702344	0.0137	7.29995e-10	ukb-b-3768	8.08487e-05	19.724	62.3899
rs9849338	age at menarche	low back pain	A	C	-0.0146123	0.35963	3	172126476	0.0139	1.50003e-11	ukb-b-3768	9.83454e-05	23.9929	62.3899
rs9851777	age at menarche	low back pain	C	T	-0.0236166	0.884106	3	88267467	0.0223	1.99986e-13	ukb-b-3768	0.000114296	27.8847	62.3899
